# Supplementary material for: Polyoxygenated meroterpenoids and a bioactive illudalane derivative from a co-culture of Armillaria sp. and Epicoccum sp.
Source: Royal Society of Chemistry journal article supplement (doi:10.1039/c9qo01087d), 2019-01-01
Supplement: c9qo01087d1.pdf [file c9qo01087d1.pdf]

## Supporting Information

### **Polyoxygenated Meroterpenoids and a Bioactive Illudalane Derivative from Co-culture of *Armillaria* sp. and *Epicoccum* sp.**

Hong-Tao Li, Linhuan Tang, Tao Liu, Ruining Yang, Yabin Yang, Hao Zhou\*, and  
Zhong-Tao Ding\*

*Key Laboratory of Functional Molecules Analysis and Biotransformation, Yunnan Provincial  
Department of Education, Key Laboratory of Medicinal Chemistry for Natural Resource, Ministry  
of Education, School of Chemical Science and Technology, Yunnan University, Kunming 650091,  
China*

Corresponding Authors

\*E-mail address: [haozhou@ynu.edu.cn](mailto:haozhou@ynu.edu.cn)

\*E-mail address: [ztding@ynu.edu.cn](mailto:ztding@ynu.edu.cn)

## Contents

|                                                                                                                                                                 |    |
|-----------------------------------------------------------------------------------------------------------------------------------------------------------------|----|
| <b>UPLC-QTOF-MS Analysis Conditions</b> .....                                                                                                                   | 1  |
| <b>Figure S1.</b> Total ion chromatograms (TIC) of extract and extracted ion chromatogram (EIC) of compounds <b>1-3</b> .....                                   | 1  |
| <b>X-ray Crystal Structure Analysis</b> .....                                                                                                                   | 2  |
| <b>Figure S2.</b> View of the pack drawing of <b>1</b> (Hydrogen-bonds are shown as dashed lines).....                                                          | 2  |
| <b>Table S1. Crystal Data and Structure Refinement for Compound 1</b> .....                                                                                     | 3  |
| <b>Figure S3.</b> <sup>1</sup> H NMR spectrum of epiterenoid A ( <b>1</b> ) in methanol- <i>d</i> <sub>4</sub> (400 MHz) .....                                  | 4  |
| <b>Figure S4.</b> <sup>13</sup> C and DEPT NMR spectrum of epiterenoid A ( <b>1</b> ) in methanol- <i>d</i> <sub>4</sub> (100 MHz).....                         | 4  |
| <b>Figure S5.</b> Partial enlarged <sup>13</sup> C and DEPT NMR spectrum of epiterenoid A ( <b>1</b> ) in methanol- <i>d</i> <sub>4</sub> (100 MHz) .....       | 5  |
| <b>Figure S6.</b> HSQC spectrum of epiterenoid A ( <b>1</b> ) in methanol- <i>d</i> <sub>4</sub> ( <sup>1</sup> H-400 MHz).....                                 | 5  |
| <b>Figure S7.</b> Partial enlarged HSQC spectrum of epiterenoid A ( <b>1</b> ) in methanol- <i>d</i> <sub>4</sub> ( <sup>1</sup> H-400 MHz)...                  | 6  |
| <b>Figure S8.</b> <sup>1</sup> H- <sup>1</sup> H COSY spectrum of epiterenoid A ( <b>1</b> ) in methanol- <i>d</i> <sub>4</sub> (400 MHz).....                  | 6  |
| <b>Figure S9.</b> Partial enlarged <sup>1</sup> H- <sup>1</sup> H COSY spectrum of epiterenoid A ( <b>1</b> ) in methanol- <i>d</i> <sub>4</sub> (400 MHz)..... | 7  |
| <b>Figure S10.</b> HMBC spectrum of epiterenoid A ( <b>1</b> ) in methanol- <i>d</i> <sub>4</sub> ( <sup>1</sup> H-400 MHz).....                                | 7  |
| <b>Figure S11.</b> Partial enlarged HMBC spectrum of epiterenoid A ( <b>1</b> ) in methanol- <i>d</i> <sub>4</sub> ( <sup>1</sup> H-400 MHz).....               | 8  |
| <b>Figure S12.</b> ROESY spectrum of epiterenoid A ( <b>1</b> ) in methanol- <i>d</i> <sub>4</sub> (400 MHz).....                                               | 8  |
| <b>Figure S13.</b> Partial enlarged ROESY spectrum of epiterenoid A ( <b>1</b> ) in methanol- <i>d</i> <sub>4</sub> (400 MHz)...                                | 9  |
| <b>Figure S14.</b> UV spectrum of epiterenoid A ( <b>1</b> ) in methanol.....                                                                                   | 9  |
| <b>Figure S15.</b> (+)-HRESIMS data of epiterenoid A ( <b>1</b> ).....                                                                                          | 10 |
| <b>Figure S16.</b> <sup>1</sup> H NMR spectrum of epiterenoid B ( <b>2</b> ) in methanol- <i>d</i> <sub>4</sub> (400 MHz).....                                  | 10 |
| <b>Figure S17.</b> <sup>13</sup> C and DEPT NMR spectrum of epiterenoid B ( <b>2</b> ) in methanol- <i>d</i> <sub>4</sub> (100 MHz).....                        | 11 |
| <b>Figure S18.</b> Partial enlarged <sup>13</sup> C and DEPT NMR spectrum of epiterenoid B ( <b>2</b> ) in methanol- <i>d</i> <sub>4</sub> (100 MHz).....       | 11 |
| <b>Figure S19.</b> HSQC spectrum of epiterenoid B ( <b>2</b> ) in methanol- <i>d</i> <sub>4</sub> ( <sup>1</sup> H-400 MHz).....                                | 12 |
| <b>Figure S20.</b> Partial enlarged HSQC spectrum of epiterenoid B ( <b>2</b> ) in methanol- <i>d</i> <sub>4</sub> ( <sup>1</sup> H-400 MHz).....               | 12 |
| <b>Figure S21.</b> <sup>1</sup> H- <sup>1</sup> H COSY spectrum of epiterenoid B ( <b>2</b> ) in methanol- <i>d</i> <sub>4</sub> (400 MHz).....                 | 13 |
| <b>Figure S22.</b> HMBC spectrum of epiterenoid B ( <b>2</b> ) in methanol- <i>d</i> <sub>4</sub> ( <sup>1</sup> H-400 MHz).....                                | 13 |
| <b>Figure S23.</b> Partial enlarged HMBC spectrum of epiterenoid B ( <b>2</b> ) in methanol- <i>d</i> <sub>4</sub> ( <sup>1</sup> H-400 MHz).....               | 14 |
| <b>Figure S24.</b> ROESY spectrum of epiterenoid B ( <b>2</b> ) in methanol- <i>d</i> <sub>4</sub> (400 MHz).....                                               | 14 |
| <b>Figure S25.</b> Partial enlarged ROESY spectrum of epiterenoid B ( <b>2</b> ) in methanol- <i>d</i> <sub>4</sub> (400 MHz).....                              | 15 |
| <b>Figure S26.</b> UV spectrum of epiterenoid B ( <b>2</b> ) in methanol.....                                                                                   | 15 |
| <b>Figure S27.</b> (+)-HRESIMS data of epiterenoid B ( <b>2</b> ).....                                                                                          | 16 |
| <b>Figure S28.</b> <sup>1</sup> H NMR spectrum of epiterenoid C ( <b>3</b> ) in methanol- <i>d</i> <sub>4</sub> (400 MHz).....                                  | 16 |
| <b>Figure S29.</b> <sup>13</sup> C and DEPT NMR spectrum of epiterenoid C ( <b>3</b> ) in methanol- <i>d</i> <sub>4</sub> (100 MHz).....                        | 17 |
| <b>Figure S30.</b> Partial enlarged <sup>13</sup> C and DEPT NMR spectrum of epiterenoid C ( <b>3</b> ) in methanol- <i>d</i> <sub>4</sub> (100 MHz).....       | 17 |

|                                                                                                                                                                      |       |
|----------------------------------------------------------------------------------------------------------------------------------------------------------------------|-------|
| <b>Figure S31.</b> HSQC spectrum of epiterenoid C ( <b>3</b> ) in methanol- <i>d</i> <sub>4</sub> ( <sup>1</sup> H-400 MHz).....                                     | 18    |
| <b>Figure S32.</b> Partial enlarged HSQC spectrum of epiterenoid C ( <b>3</b> ) in methanol- <i>d</i> <sub>4</sub> ( <sup>1</sup> H-400 MHz).....                    | 18    |
| <b>Figure S33.</b> <sup>1</sup> H- <sup>1</sup> H COSY spectrum of epiterenoid C ( <b>3</b> ) in methanol- <i>d</i> <sub>4</sub> (400 MHz).....                      | 19    |
| <b>Figure S34.</b> HMBC spectrum of epiterenoid C ( <b>3</b> ) in methanol- <i>d</i> <sub>4</sub> ( <sup>1</sup> H-400 MHz).....                                     | 19    |
| <b>Figure S35.</b> Partial enlarged HMBC spectrum of epiterenoid C ( <b>3</b> ) in methanol- <i>d</i> <sub>4</sub> ( <sup>1</sup> H-400 MHz).....                    | 20    |
| <b>Figure S36.</b> ROESY spectrum of epiterenoid C ( <b>3</b> ) in methanol- <i>d</i> <sub>4</sub> (400 MHz).....                                                    | 20    |
| <b>Figure S37.</b> Partial enlarged ROESY spectrum of epiterenoid C ( <b>3</b> ) in methanol- <i>d</i> <sub>4</sub> (400 MHz).....                                   | 21    |
| <b>Figure S38.</b> UV spectrum of epiterenoid C ( <b>3</b> ) in methanol.....                                                                                        | 21    |
| <b>Figure S39.</b> (+)-HRESIMS data of epiterenoid C ( <b>3</b> ).....                                                                                               | 22    |
| <b>Figure S40.</b> <sup>1</sup> H NMR spectrum of arniloid A ( <b>4</b> ) in methanol- <i>d</i> <sub>4</sub> (400 MHz).....                                          | 22    |
| <b>Figure S41.</b> <sup>13</sup> C and DEPT NMR spectrum of arniloid A ( <b>4</b> ) in methanol- <i>d</i> <sub>4</sub> (100 MHz).....                                | 23    |
| <b>Figure S42.</b> Partial enlarged <sup>13</sup> C and DEPT NMR of arniloid A ( <b>4</b> ) in methanol- <i>d</i> <sub>4</sub> (100 MHz).....                        | 23    |
| <b>Figure S43.</b> HSQC spectrum of arniloid A ( <b>4</b> ) in methanol- <i>d</i> <sub>4</sub> ( <sup>1</sup> H-400 MHz).....                                        | 24    |
| <b>Figure S44.</b> Partial enlarged HSQC spectrum of arniloid A ( <b>4</b> ) in methanol- <i>d</i> <sub>4</sub> ( <sup>1</sup> H-400 MHz).....                       | 24    |
| <b>Figure S45.</b> <sup>1</sup> H- <sup>1</sup> H COSY spectrum of arniloid A ( <b>4</b> ) in methanol- <i>d</i> <sub>4</sub> (400 MHz).....                         | 25    |
| <b>Figure S46.</b> HMBC spectrum of arniloid A ( <b>4</b> ) in methanol- <i>d</i> <sub>4</sub> ( <sup>1</sup> H-400 MHz).....                                        | 25    |
| <b>Figure S47.</b> Partial enlarged HMBC spectrum of arniloid A ( <b>4</b> ) in methanol- <i>d</i> <sub>4</sub> ( <sup>1</sup> H-400 MHz).....                       | 26    |
| <b>Figure S48.</b> Partial enlarged HMBC spectrum of arniloid A ( <b>4</b> ) in methanol- <i>d</i> <sub>4</sub> ( <sup>1</sup> H-400 MHz).....                       | 26    |
| <b>Figure S49.</b> ROESY spectrum of arniloid A ( <b>4</b> ) in methanol- <i>d</i> <sub>4</sub> (400 MHz).....                                                       | 27    |
| <b>Figure S50.</b> UV spectrum of arniloid A ( <b>4</b> ) in methanol.....                                                                                           | 27    |
| <b>Figure S51.</b> (+)-HRESIMS data of arniloid A ( <b>4</b> ).....                                                                                                  | 28    |
| <b>ECD calculation details for compounds 1-4</b> .....                                                                                                               | 28    |
| <b>Figure S52.</b> Optimized geometries of predominant conformers for <b>1</b> .....                                                                                 | 28    |
| <b>Figure S53.</b> Optimized geometries of predominant conformers for <b>2</b> .....                                                                                 | 29    |
| <b>Figure S54.</b> Optimized geometries of predominant conformers for <b>3</b> .....                                                                                 | 29    |
| <b>Figure S55.</b> Optimized geometries of predominant conformers for (1 <i>S</i> )- <b>4a</b> .....                                                                 | 29    |
| <b>Figure S56.</b> Optimized geometries of predominant conformers for (1 <i>S</i> )- <b>4b</b> .....                                                                 | 30    |
| <b>Table S2. Important Thermodynamic Parameters (a.u.) and Boltzmann Distributions of the Optimized Compounds 1-4 at B3LYP/6-311G (d, p) Level in Methanol</b> ..... | 30    |
| <b>Table S3. The Cartesian Coordinates of the Lowest Energy Conformers for Compounds 1-4</b> .....                                                                   | 31-63 |

### UPLC-QTOF-MS Analysis Conditions

The analysis of the extracts from the co-cultures was performed by an Agilent 1290 UPLC (6545)-QTOF-MS spectrometry system in the positive ion modes. The UPLC column was an Agilent ZORBAX RRHD Eclipse Plus-C18 column (1.8  $\mu\text{m}$ , 2.1  $\times$  50 mm) and kept at a temperature of 40  $^{\circ}\text{C}$ . The mobile phase consisted of A (water with 0.05% formic acid) and B (acetonitrile with 0.05% formic acid) at a flow rate of 0.4 mL/min. The injected sample (1 mg/mL) volume was set at 3  $\mu\text{L}$ . The gradient elution started with 10% B, it was increased linearly to 70% B in 50 min, and then it was increased linearly to 95% B in 10 min and held for 5 min.

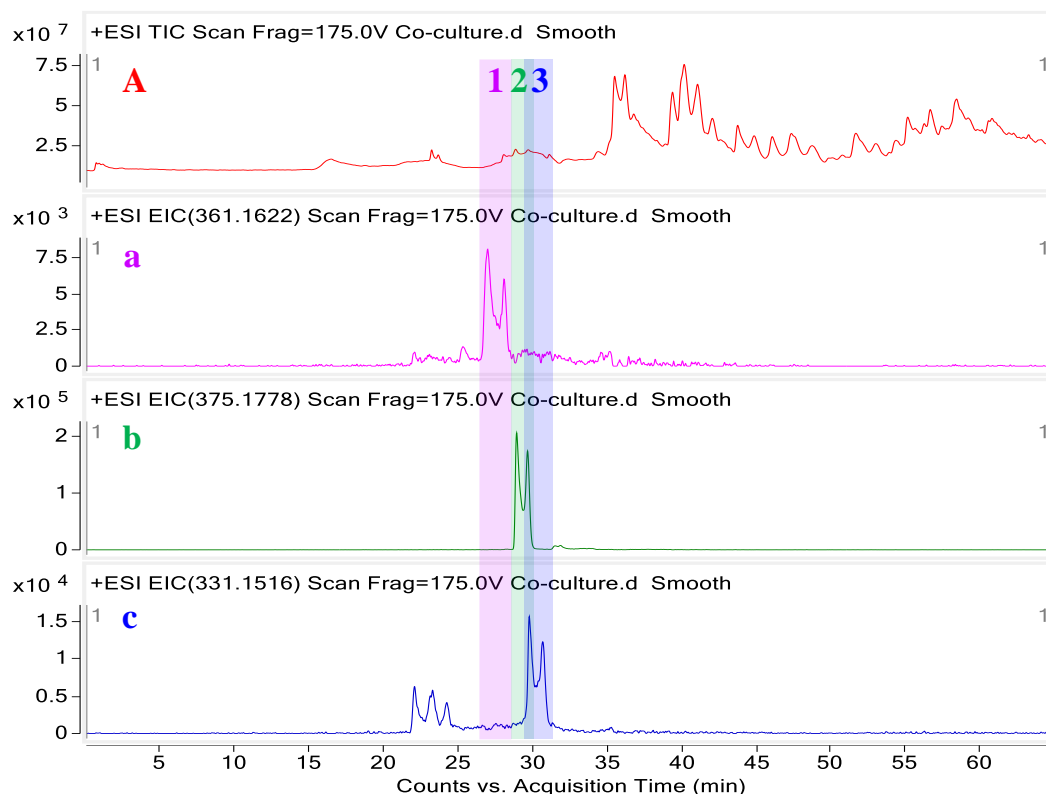

**Figure S1.** Total ion chromatograms (TIC) of extract from co-culture and extracted ion chromatogram (EIC) of compounds **1-3**. (TIC (positive) of the extract from co-culture (**A**); EIC of compound **1** at  $m/z$  361.1622  $[\text{M} + \text{Na}]^+$  in the extract of co-culture (**a**); EIC of compound **2** at  $m/z$  375.1778  $[\text{M} + \text{Na}]^+$  in the extract of co-culture (**b**); EIC of compound **3** at  $m/z$  331.1516  $[\text{M} + \text{Na}]^+$  in the extract of co-culture (**c**)).

### X-ray Crystal Structure Analysis

The crystal data of **1** was collected on a Bruker Apex DUO diffractometer with a graphite monochromator using Cu K $\alpha$  radiation ( $\lambda = 1.54178 \text{ \AA}$ ). The crystallographic data have been deposited in the Cambridge Crystallographic Data Centre with the deposition number CCDC 1918369. A copy of the data can be obtained, free of charge, on application to the Director, CCDC, 12 Union Road, Cambridge CB2 1EZ, UK (via: [www.ccdc.cam.ac.uk/data\\_request/cif](http://www.ccdc.cam.ac.uk/data_request/cif)).

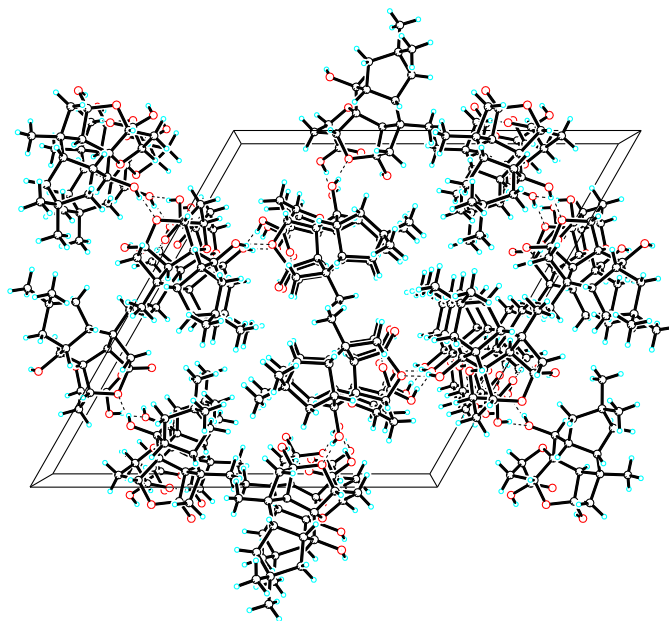

**Figure S2.** View of the pack drawing of **1** (Hydrogen-bonds are shown as dashed lines).

**Table S1. Crystal Data and Structure Refinement for Compound 1**

|                                   |                                                |          |
|-----------------------------------|------------------------------------------------|----------|
| Identification code               | global                                         |          |
| Empirical formula                 | C <sub>18</sub> H <sub>26</sub> O <sub>6</sub> |          |
| Formula weight                    | 338.39                                         |          |
| Temperature                       | 100(2) K                                       |          |
| Wavelength                        | 1.54178 Å                                      |          |
| Crystal system                    | Hexagonal                                      |          |
| Space group                       | P6 <sub>s</sub>                                |          |
| Unit cell dimensions              | a = 20.3875(7) Å                               | α = 90°  |
|                                   | b = 20.3875(7) Å                               | β = 90°  |
|                                   | c = 7.4174(3) Å                                | γ = 120° |
| Volume                            | 2670.0(2) Å <sup>3</sup>                       |          |
| Z                                 | 6                                              |          |
| Density (calculated)              | 1.263 Mg/m <sup>3</sup>                        |          |
| Absorption coefficient            | 0.777 mm <sup>-1</sup>                         |          |
| F(000)                            | 1092                                           |          |
| Crystal size                      | 0.330 x 0.130 x 0.130 mm <sup>3</sup>          |          |
| Theta range for data collection   | 2.50 to 72.41°                                 |          |
| Index ranges                      | -25 ≤ h ≤ 25, -23 ≤ k ≤ 25, -9 ≤ l ≤ 9         |          |
| Reflections collected             | 39060                                          |          |
| Independent reflections           | 3518 [R(int) = 0.0316]                         |          |
| Completeness to theta = 72.41°    | 99.8 %                                         |          |
| Absorption correction             | Semi-empirical from equivalents                |          |
| Max. and min. transmission        | 0.91 and 0.84                                  |          |
| Refinement method                 | Full-matrix least-squares on F <sup>2</sup>    |          |
| Data / restraints / parameters    | 3518 / 1 / 223                                 |          |
| Goodness-of-fit on F <sup>2</sup> | 0.831                                          |          |
| Final R indices [I > 2σ(I)]       | R1 = 0.0254, wR2 = 0.0844                      |          |
| R indices (all data)              | R1 = 0.0256, wR2 = 0.0852                      |          |
| Absolute structure parameter      | 0.06(3)                                        |          |
| Largest diff. peak and hole       | 0.246 and -0.166 e.Å <sup>-3</sup>             |          |

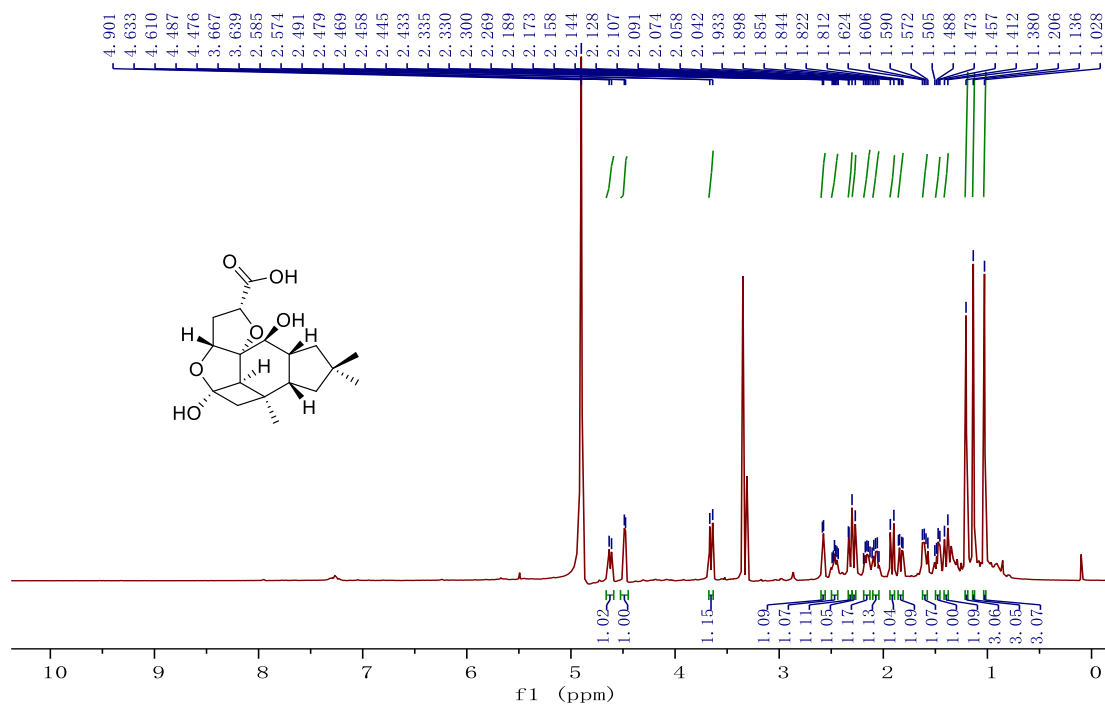

**Figure S3.** <sup>1</sup>H NMR spectrum of epiterenoid A (**1**) in methanol-*d*<sub>4</sub> (400 MHz).

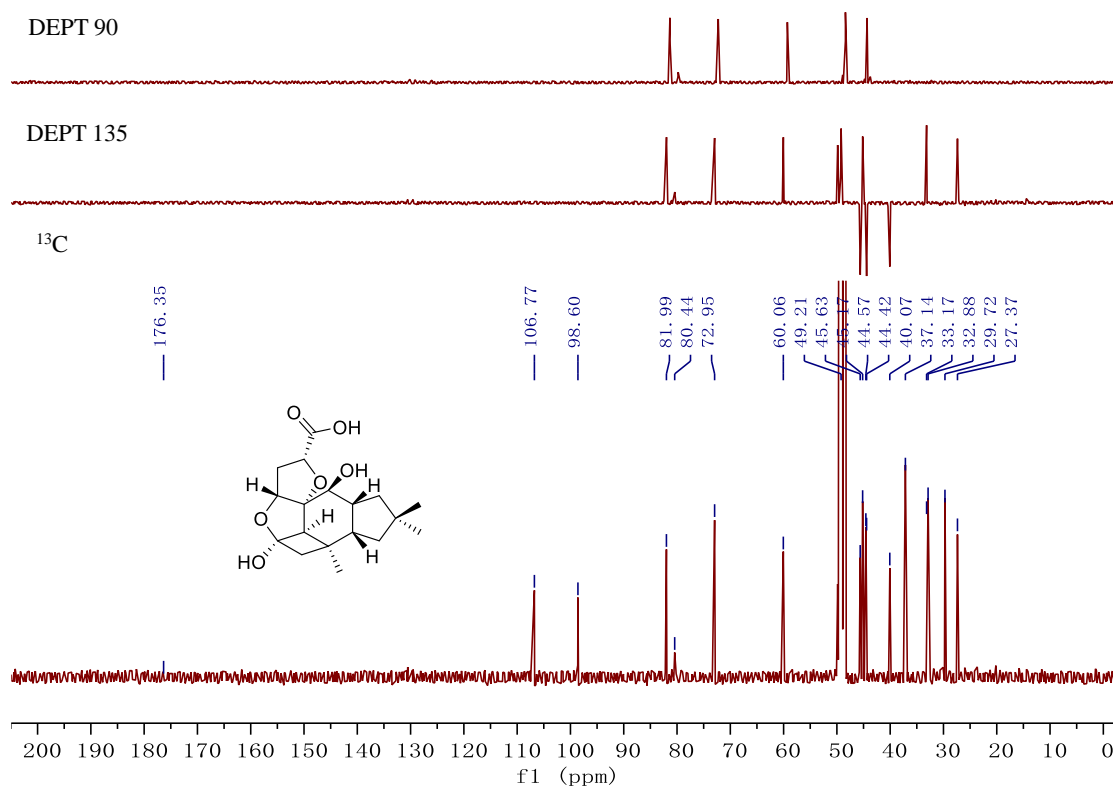

**Figure S4.** <sup>13</sup>C and DEPT NMR spectrum of epiterenoid A (**1**) in methanol-*d*<sub>4</sub> (100 MHz).

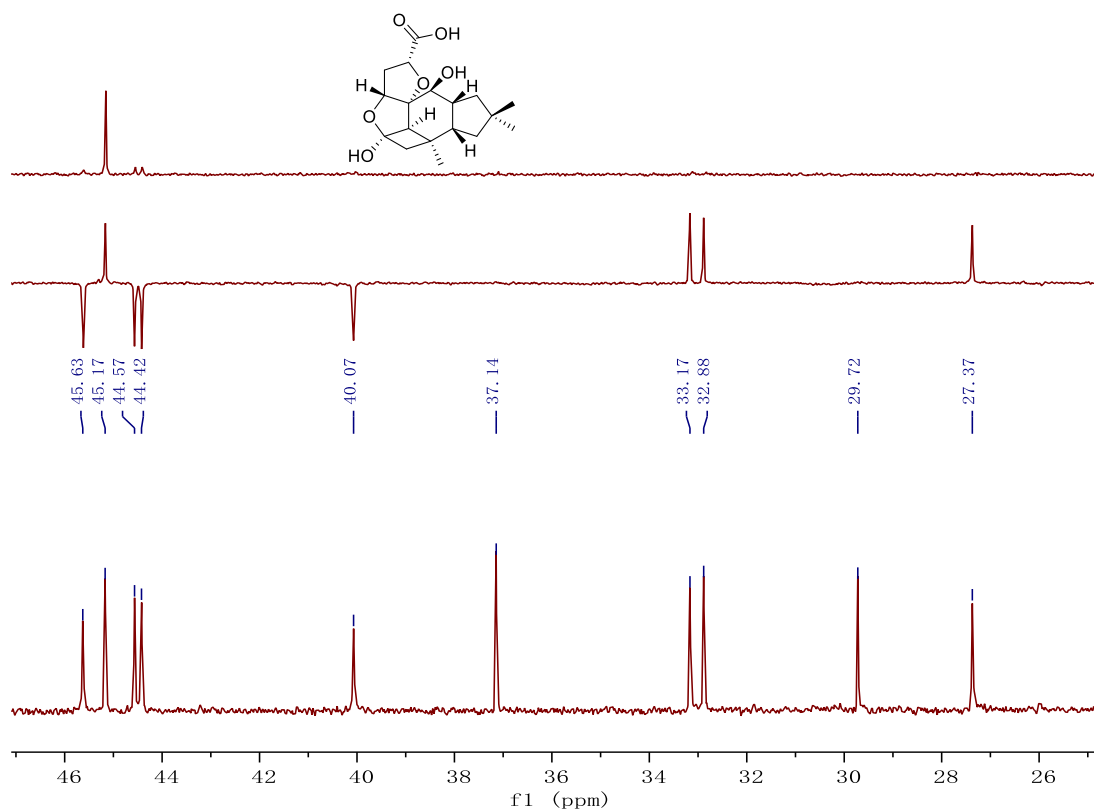

**Figure S5.** Partial enlarged  $^{13}\text{C}$  and DEPT NMR spectrum of epiterpenoid A (**1**) in methanol- $d_4$  (100 MHz).

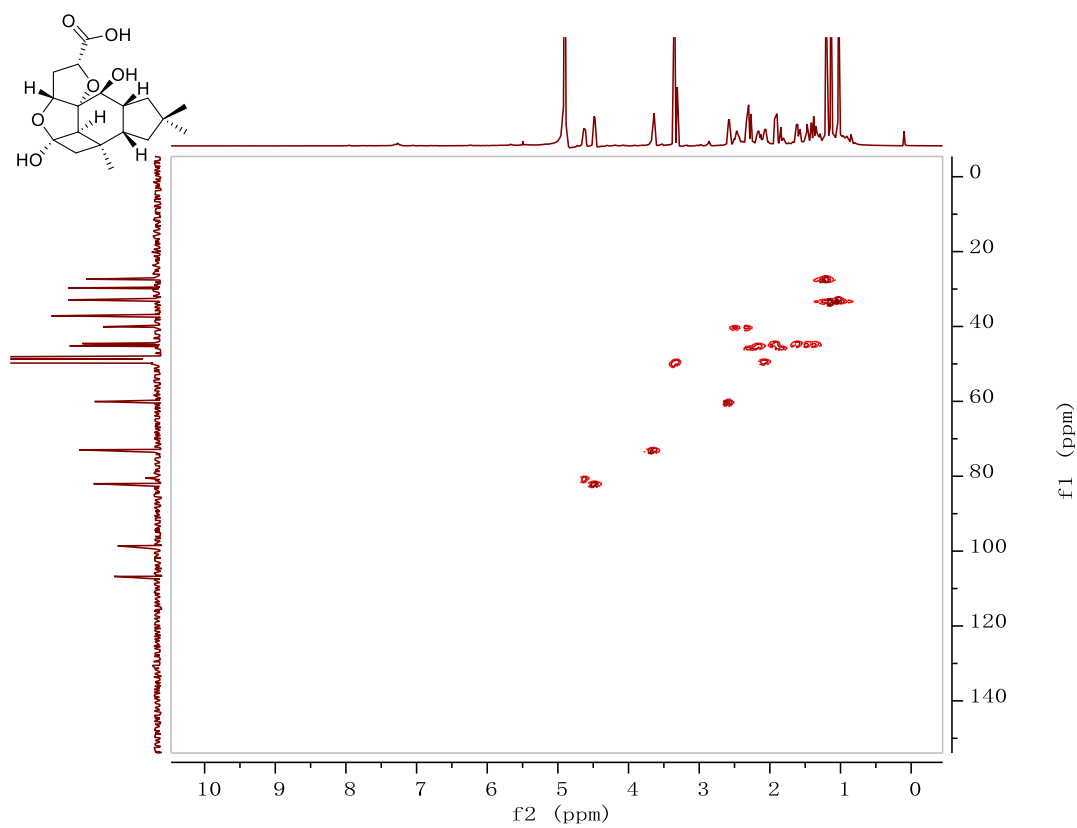

**Figure S6.** HSQC spectrum of epiterpenoid A (**1**) in methanol- $d_4$  ( $^1\text{H}$ -400 MHz).



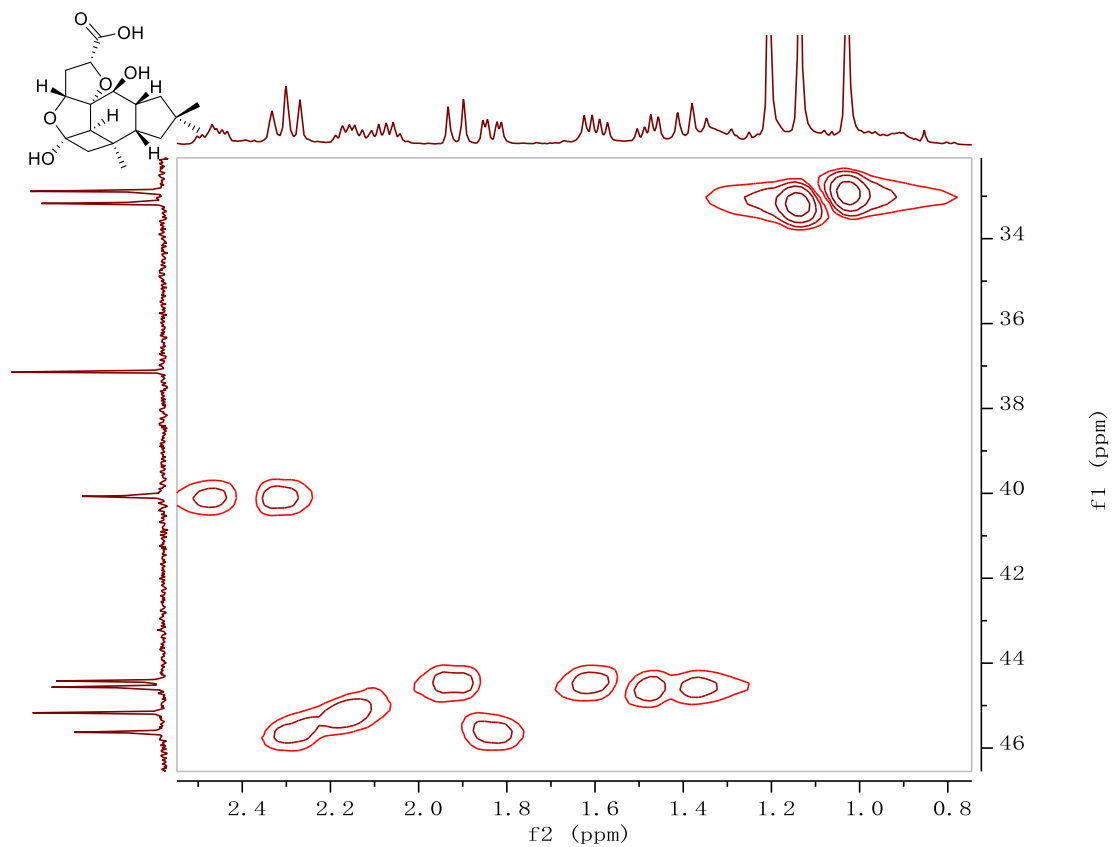

**Figure S7.** Partial enlarged HSQC spectrum of epiterenoid A (**1**) in methanol- $d_4$  ( $^1\text{H}$ -400 MHz).

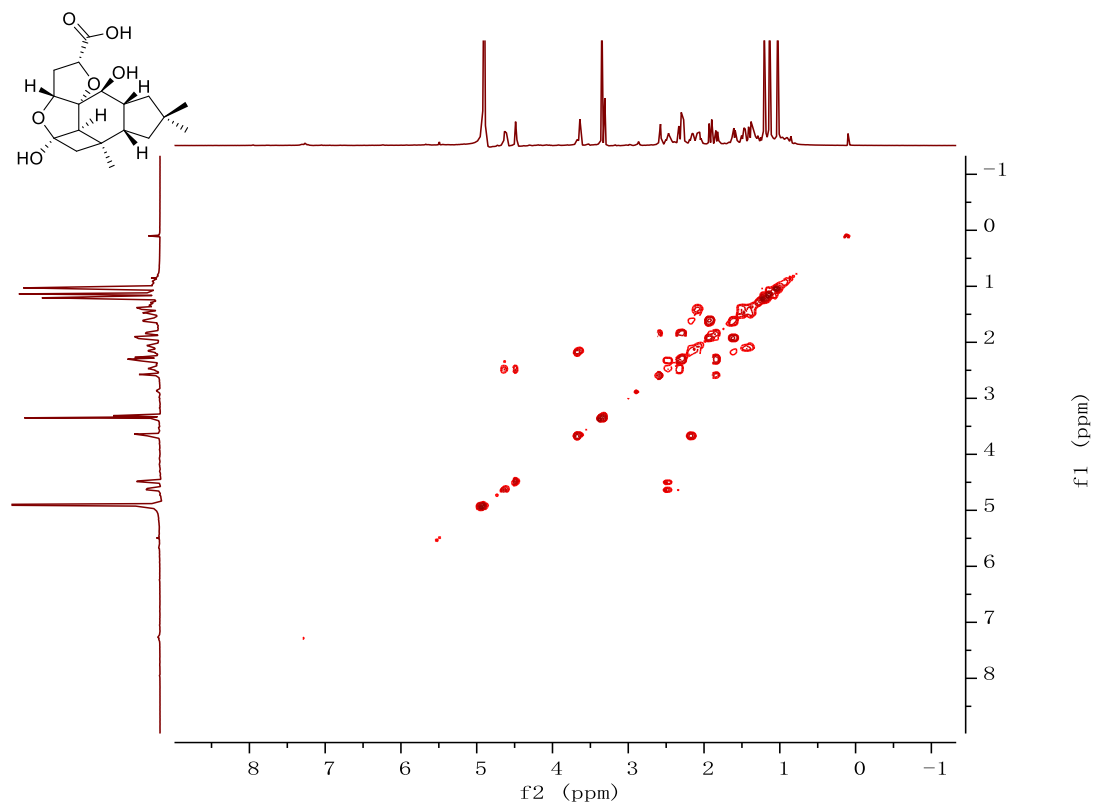

**Figure S10.**  $^1\text{H}$ - $^1\text{H}$  COSY spectrum of epiterenoid A (**1**) in methanol- $d_4$  (400 MHz).

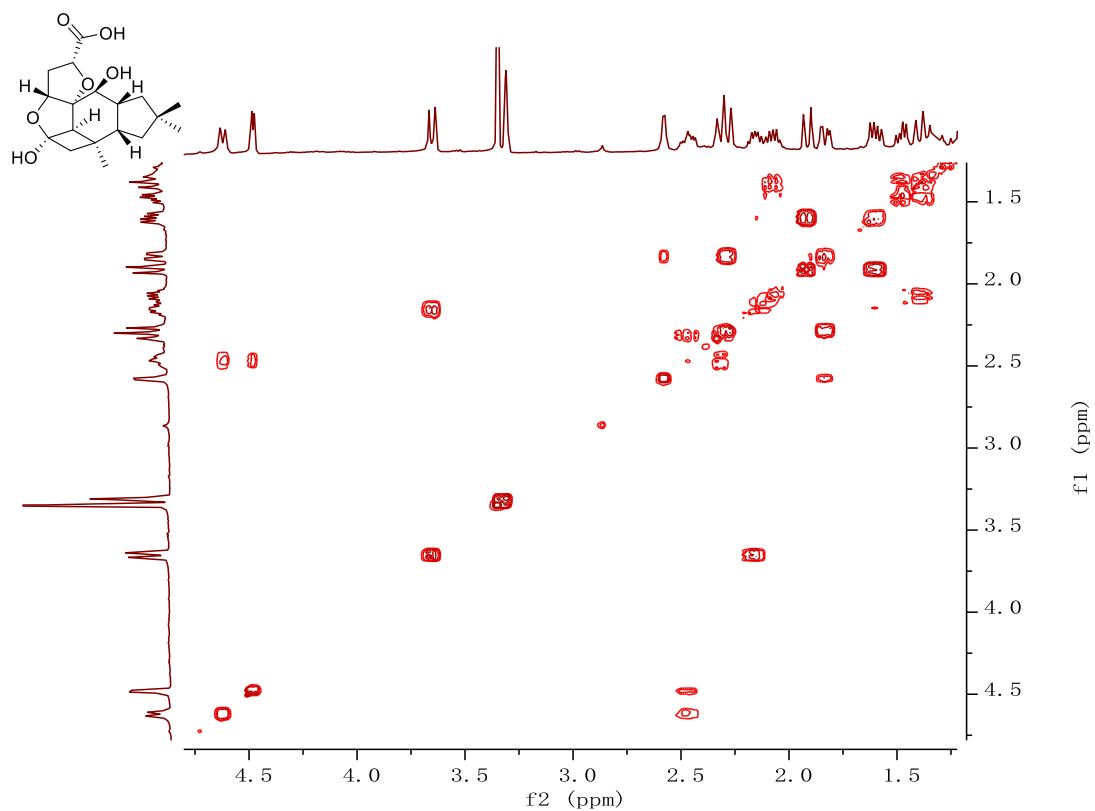

**Figure S9.** Partial enlarged  $^1\text{H}$ - $^1\text{H}$  COSY spectrum of epiterenoid A (**1**) in methanol- $d_4$  (400 MHz).

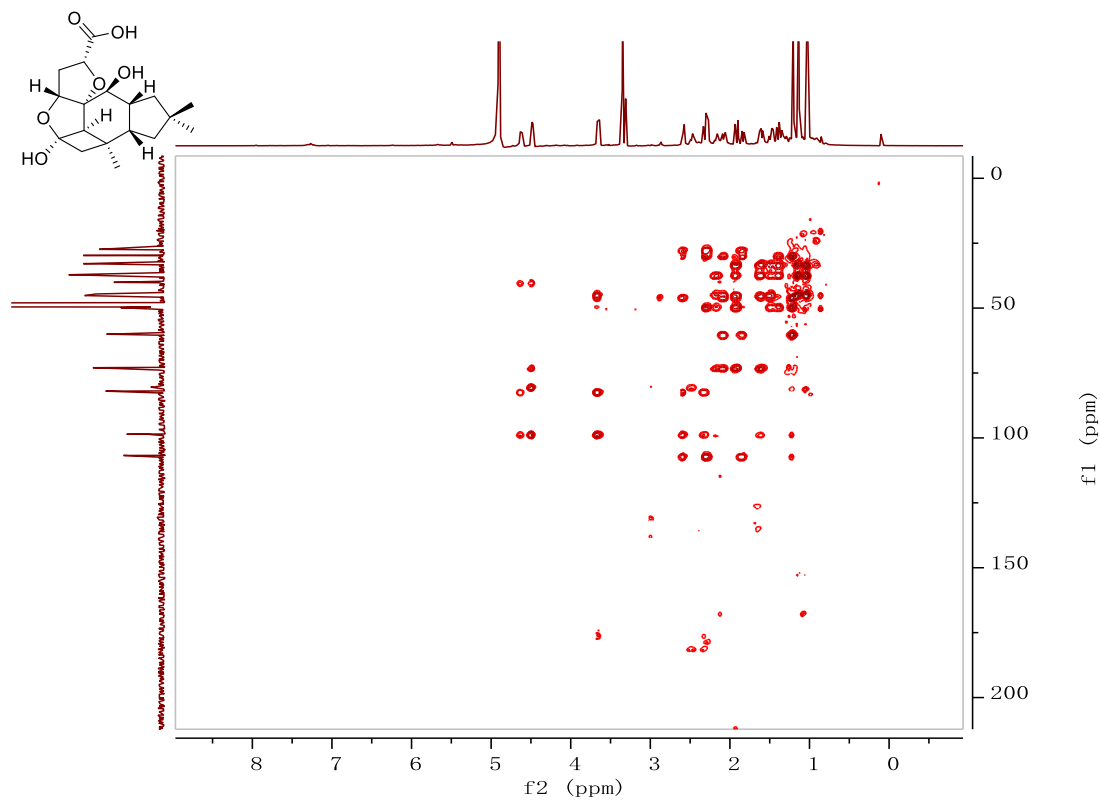

**Figure S10.** HMBC spectrum of epiterenoid A (**1**) in methanol- $d_4$  ( $^1\text{H}$ -400 MHz).

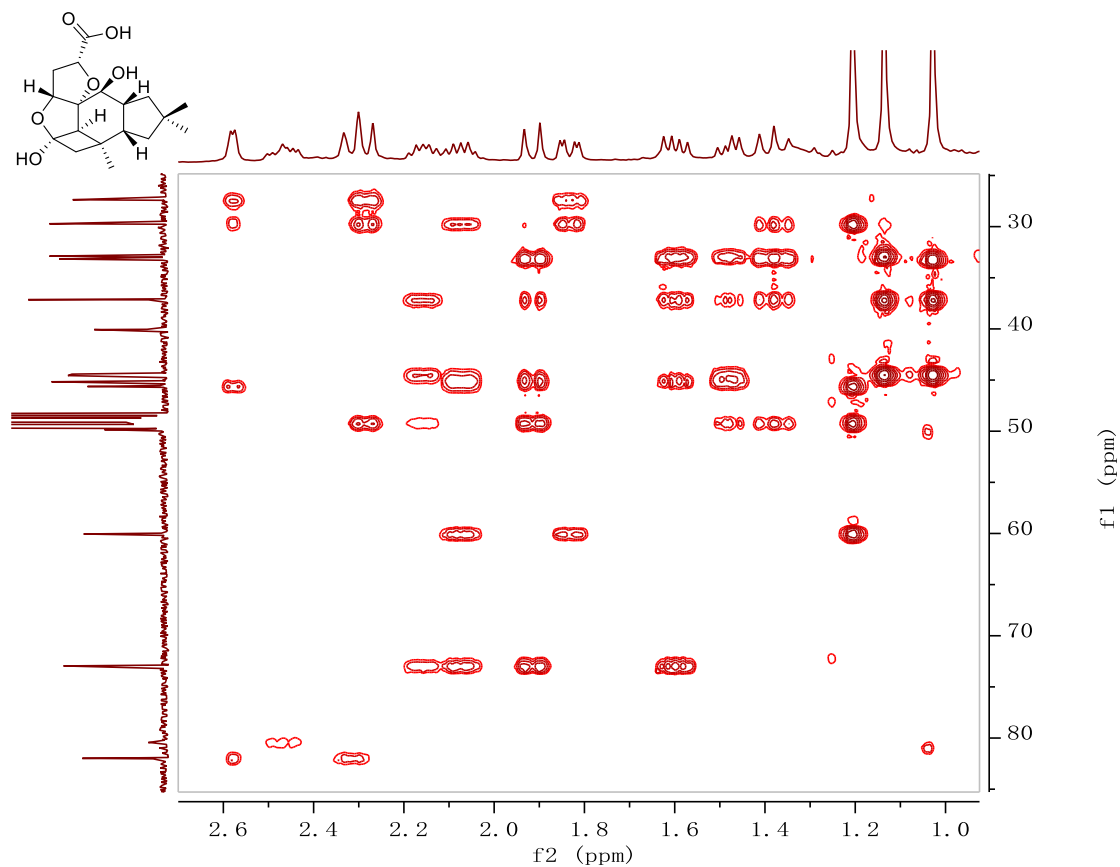

**Figure S11.** Partial enlarged HMBC spectrum of epiterenoid A (**1**) in methanol- $d_4$  ( $^1\text{H}$ -400 MHz).

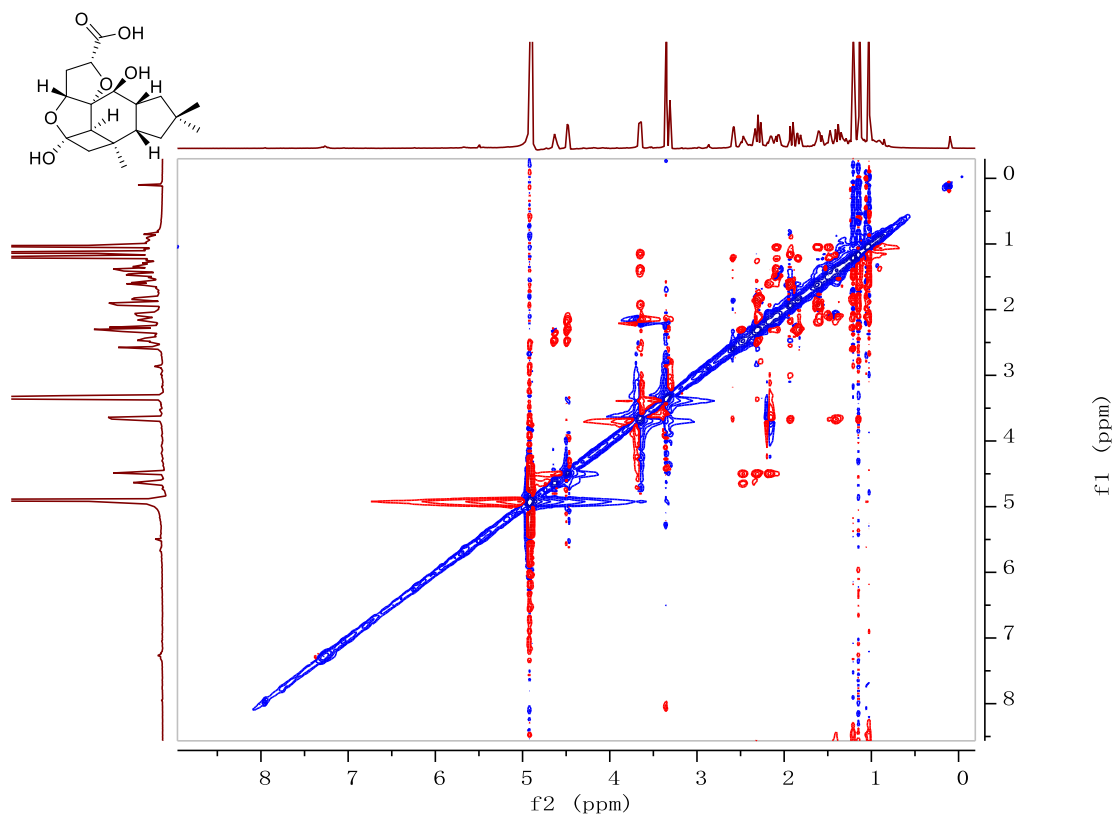

**Figure S12.** ROESY spectrum of epiterenoid A (**1**) in methanol- $d_4$  (400 MHz).

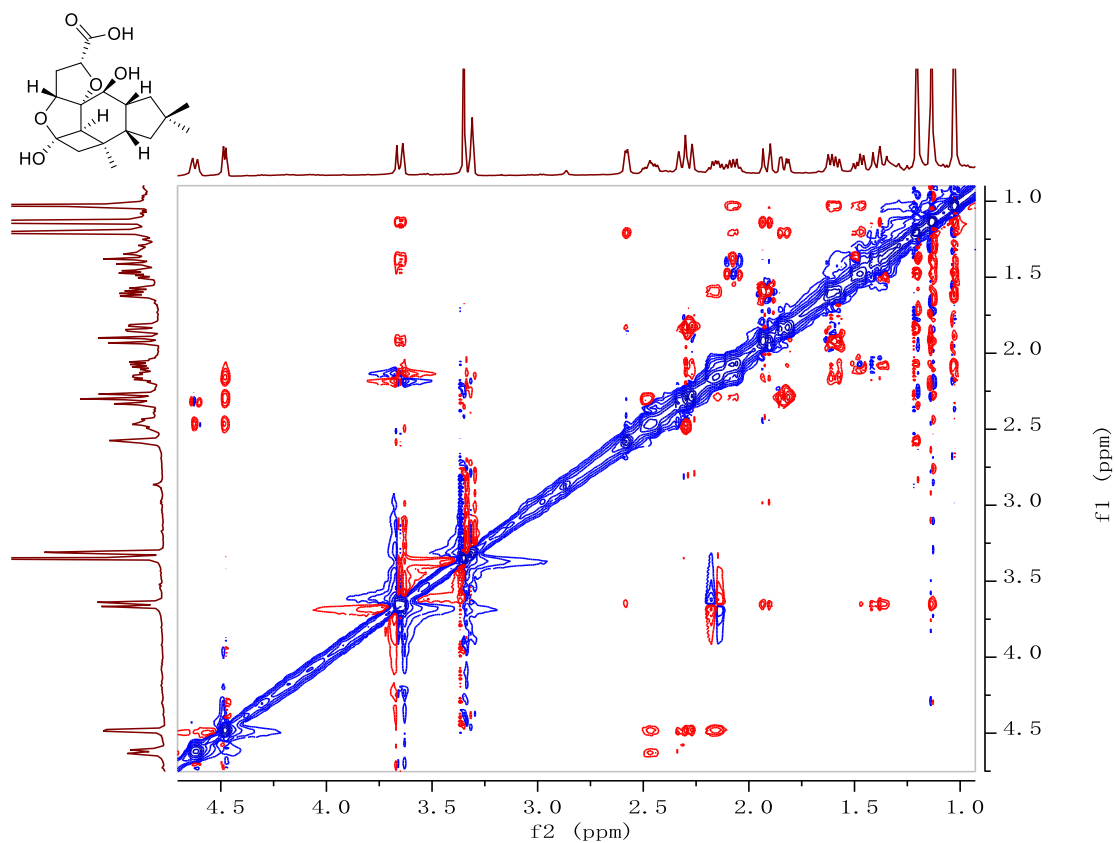

**Figure S13.** Partial enlarged ROESY spectrum of epiterenoid A (**1**) in methanol-*d*<sub>4</sub> (400 MHz).

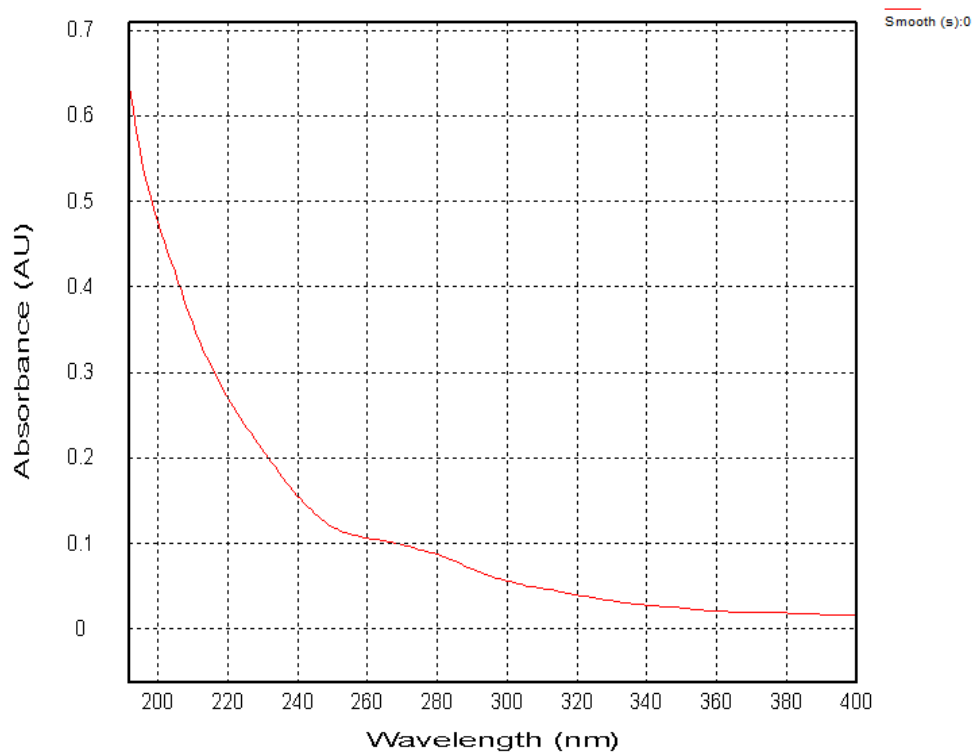

**Figure S14.** UV spectrum of epiterenoid A (**1**) in methanol.

29 #56 RT: 1.04 AV: 1 NL: 9.71E6  
T: FTMS + c ESI Full ms [100.00-400.00]

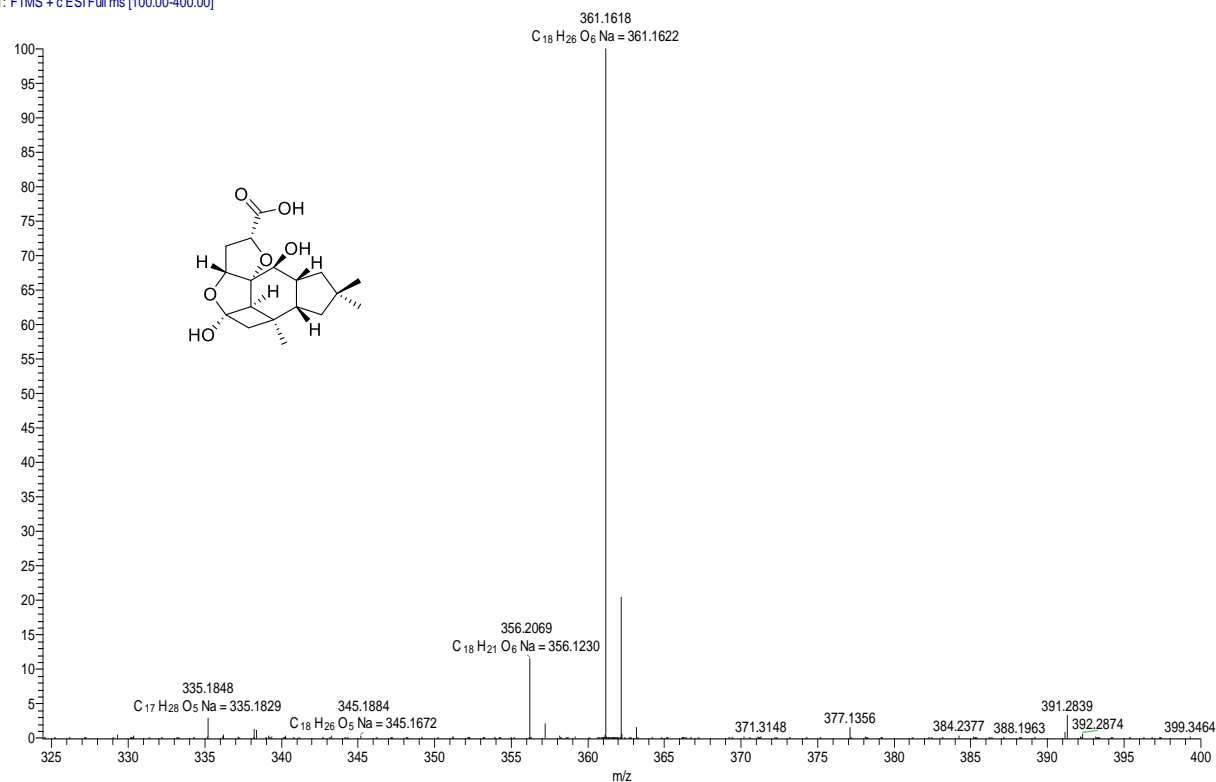

Figure S15. (+)-HRESIMS data of epiterenoid A (1).

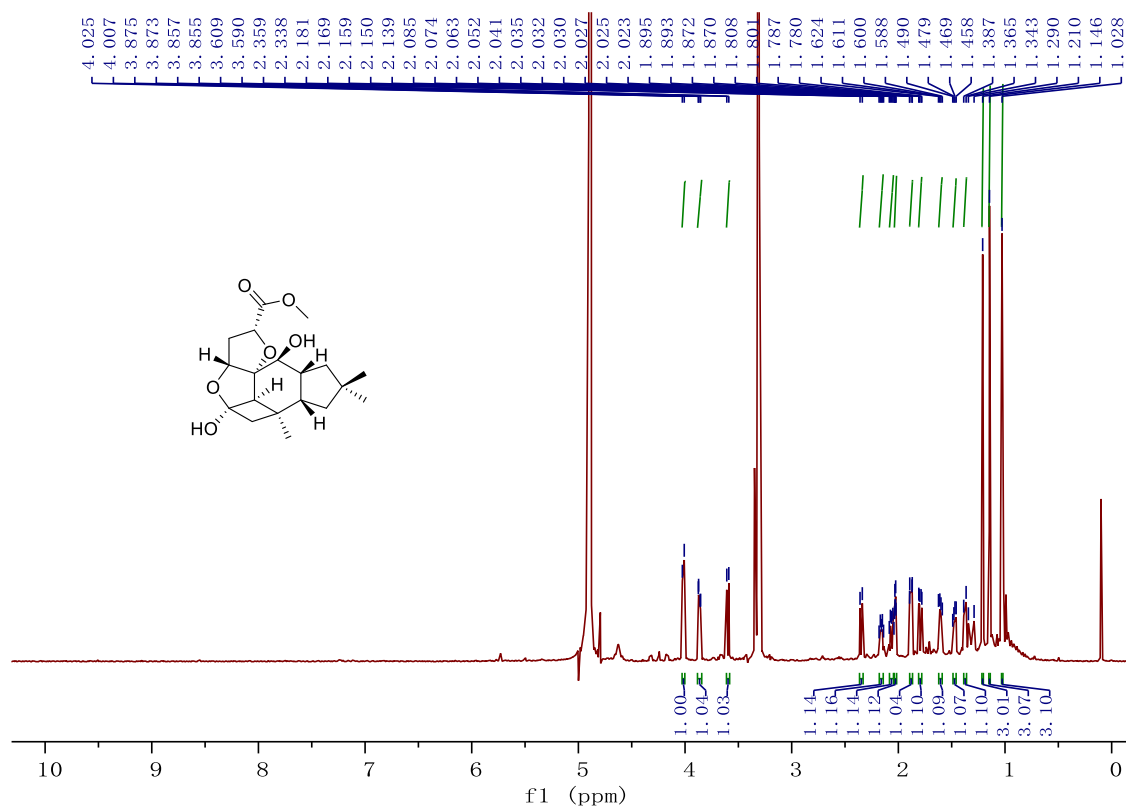

Figure S16. <sup>1</sup>H NMR spectrum of epiterenoid B (2) in methanol-*d*<sub>4</sub> (400 MHz).

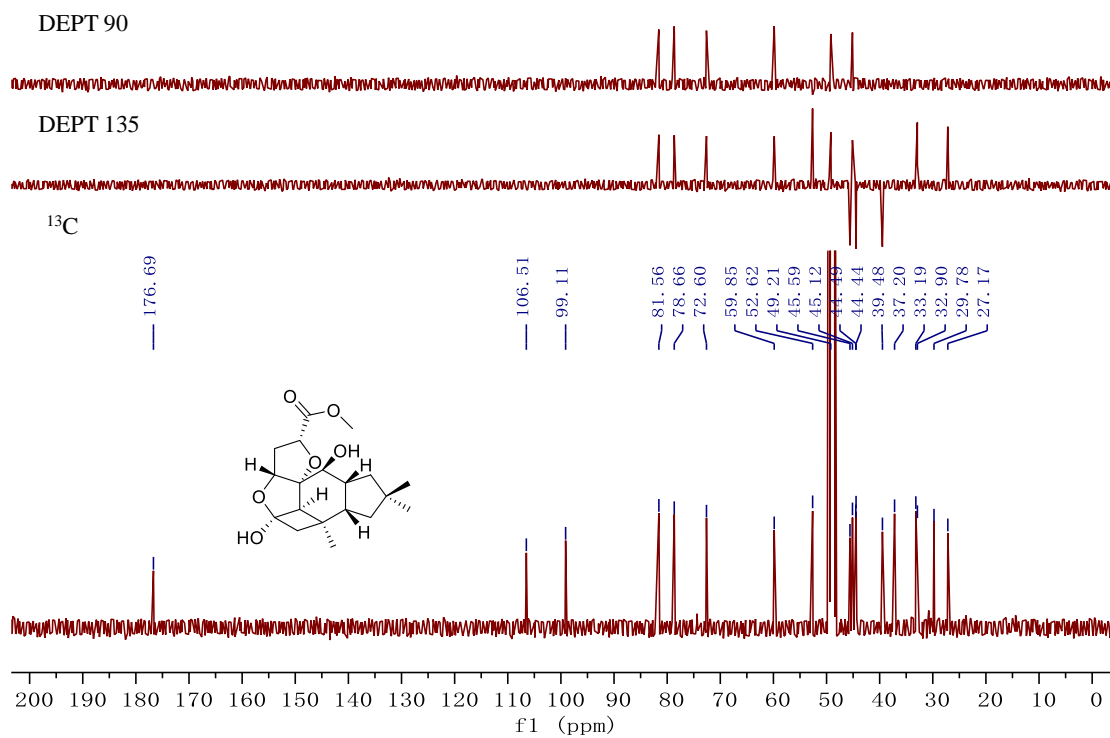

**Figure S17.**  $^{13}\text{C}$  and DEPT NMR spectrum of epiterpenoid B (**2**) in methanol- $d_4$  (100 MHz).

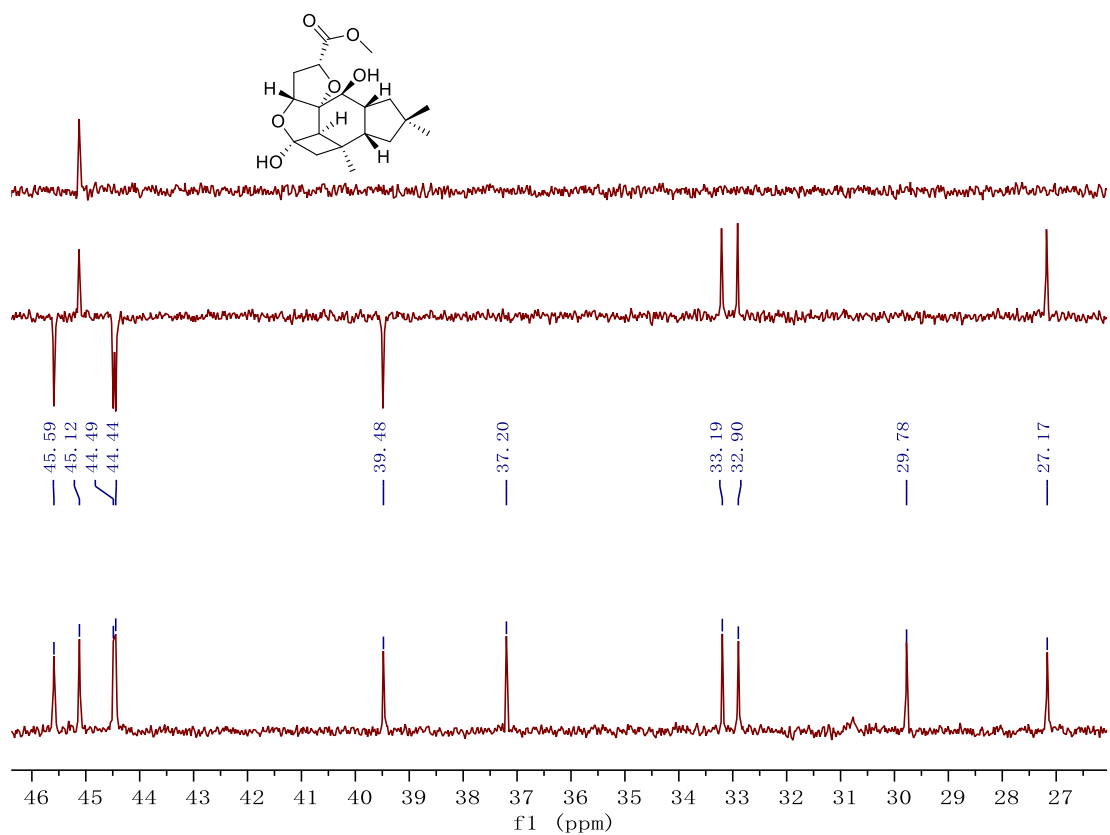

**Figure S18.** Partial enlarged  $^{13}\text{C}$  and DEPT NMR spectrum of epiterpenoid B (**2**) in methanol- $d_4$  (100 MHz).

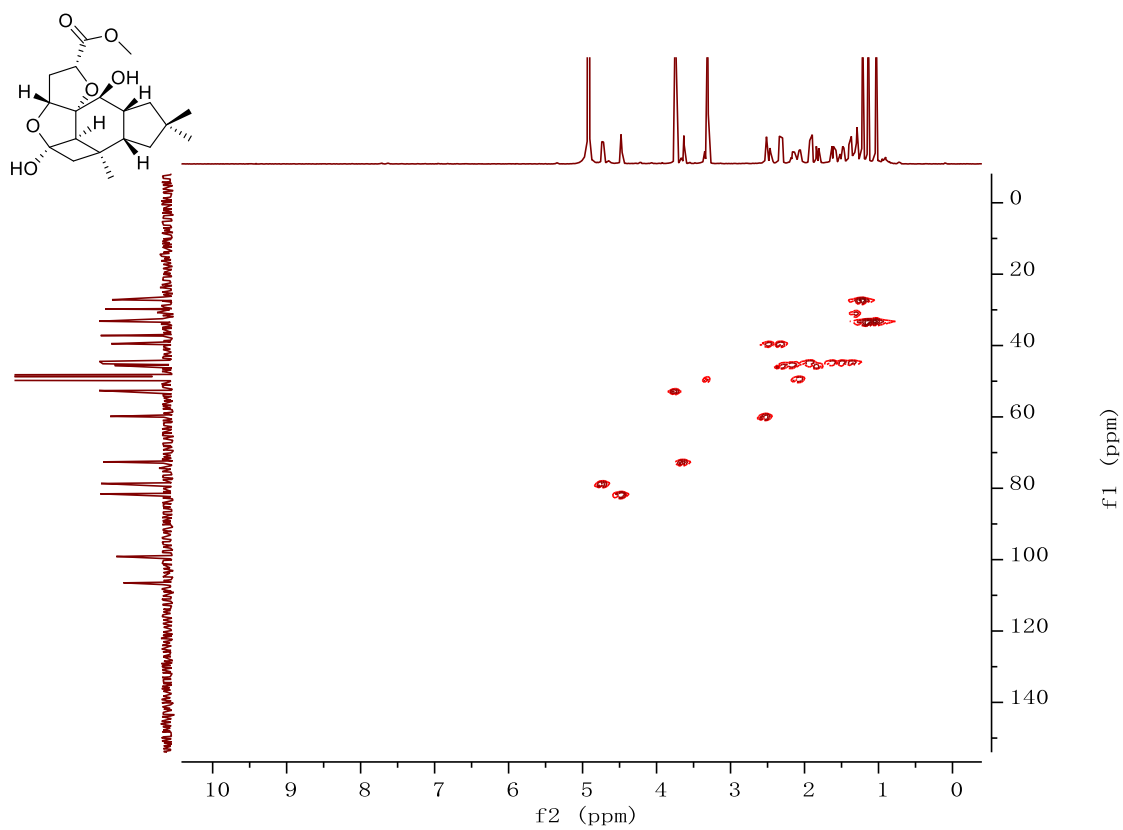

**Figure S19.** HSQC spectrum of epiterenoid B (**2**) in methanol- $d_4$  ( $^1\text{H}$ -400 MHz).

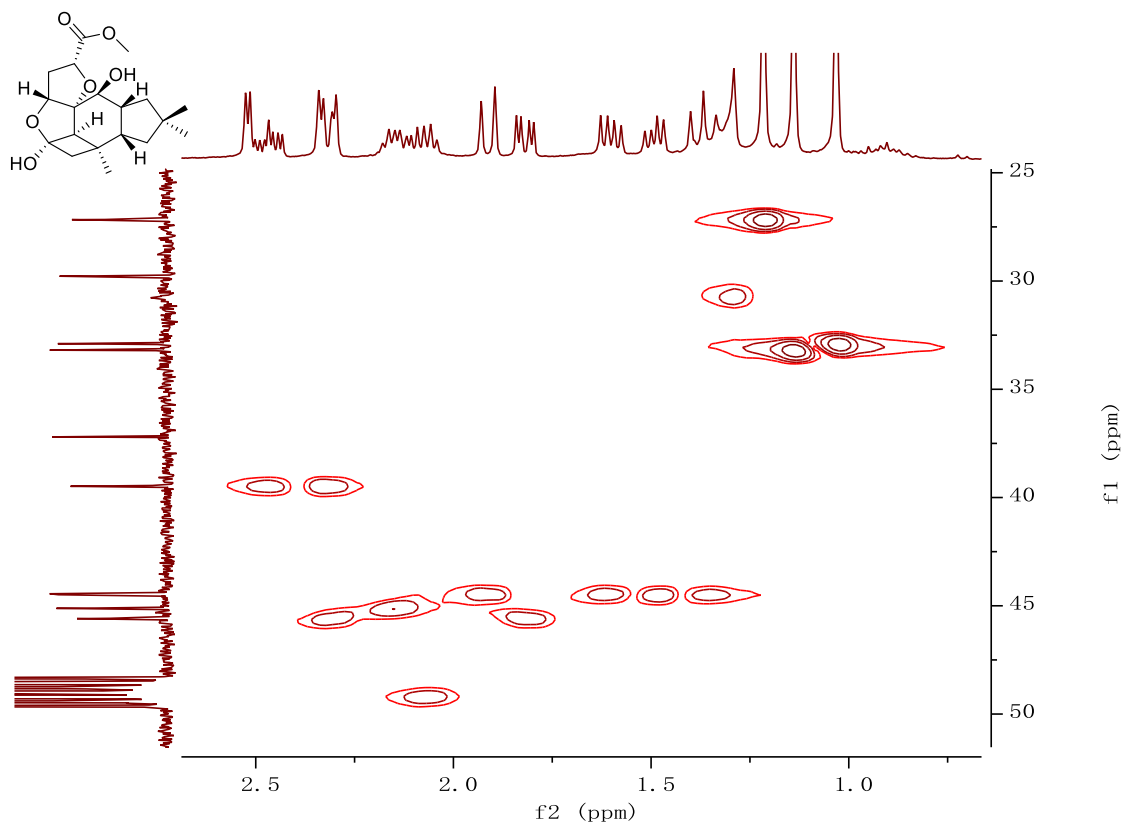

**Figure S20.** Partial enlarged HSQC spectrum of epiterenoid B (**2**) in methanol- $d_4$  ( $^1\text{H}$ -400 MHz).

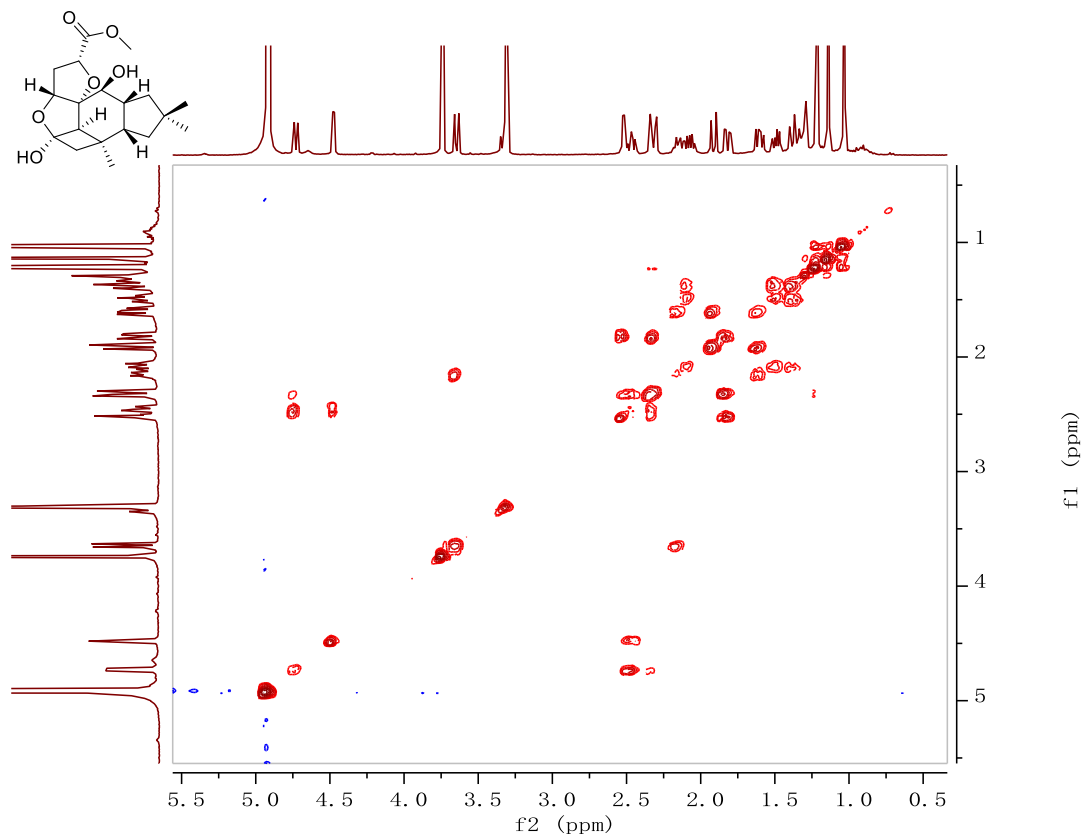

**Figure S21.**  $^1\text{H}$ - $^1\text{H}$  COSY spectrum of epiterenoid B (**2**) in methanol- $d_4$  (400 MHz).

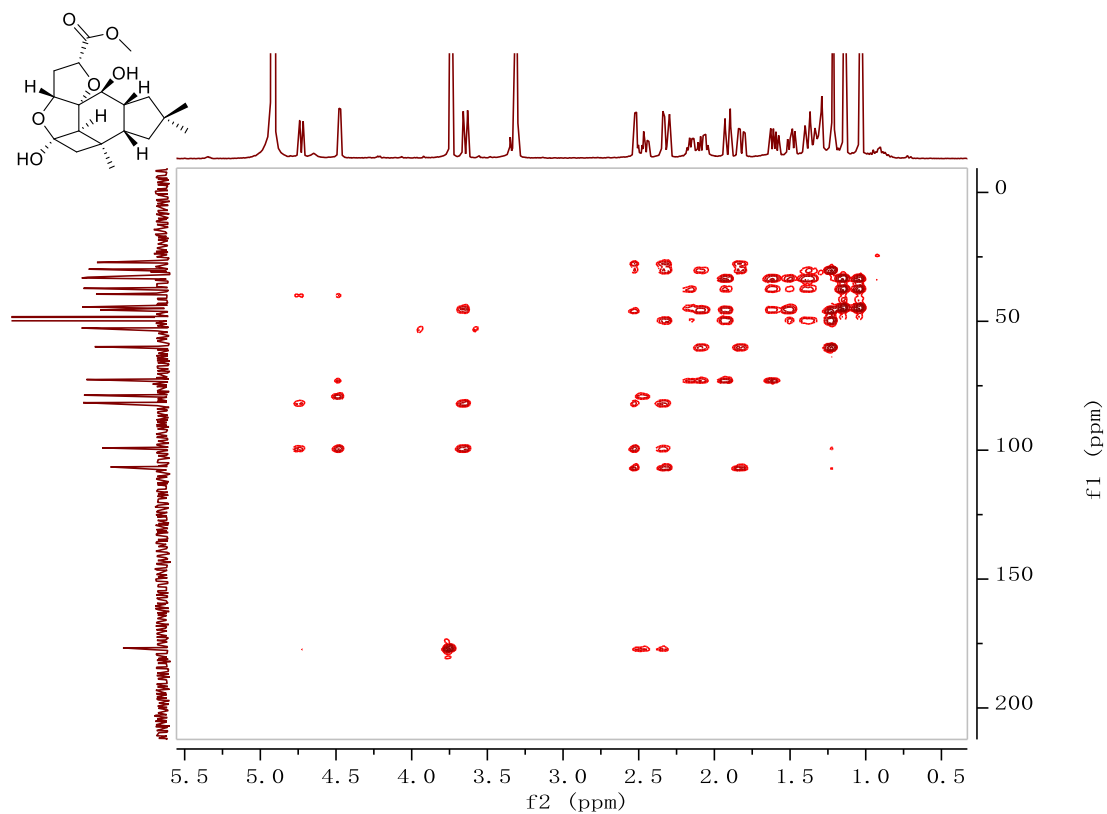

**Figure S22.** HMBC spectrum of epiterenoid B (**2**) in methanol- $d_4$  ( $^1\text{H}$ -400 MHz).



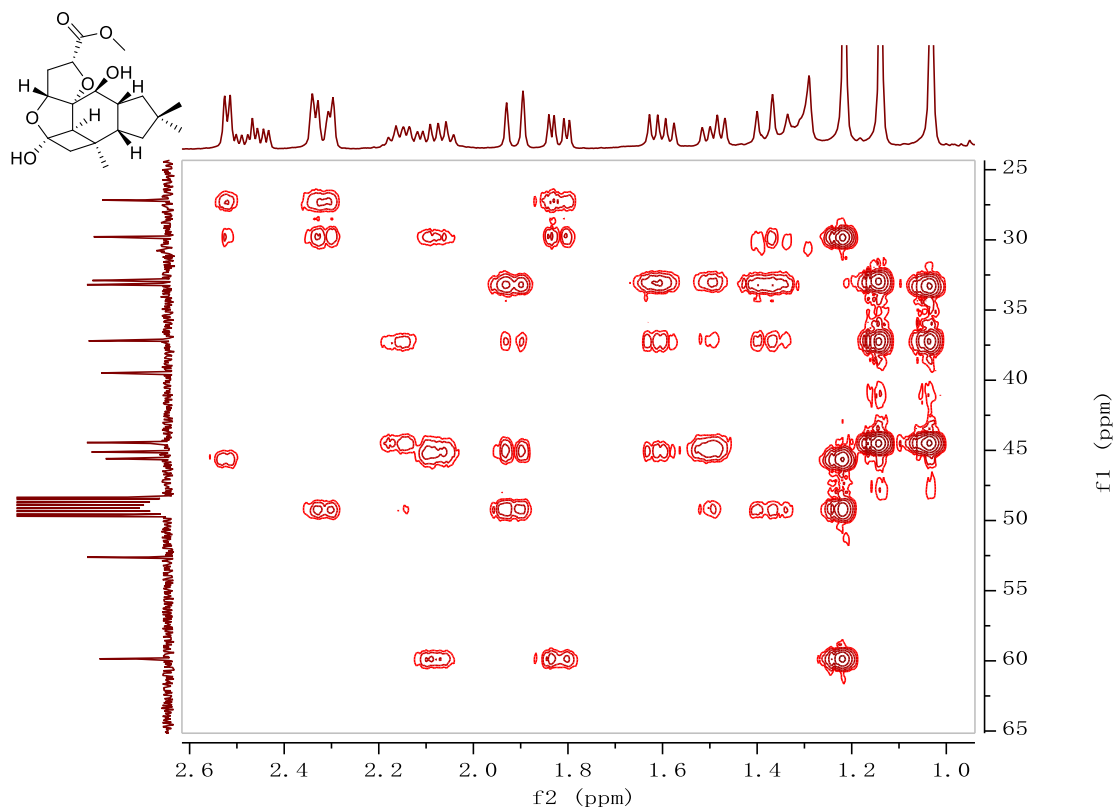

**Figure S23.** Partial enlarged HMBC spectrum of epiterenoid B (**2**) in methanol- $d_4$  ( $^1\text{H}$ -400 MHz).

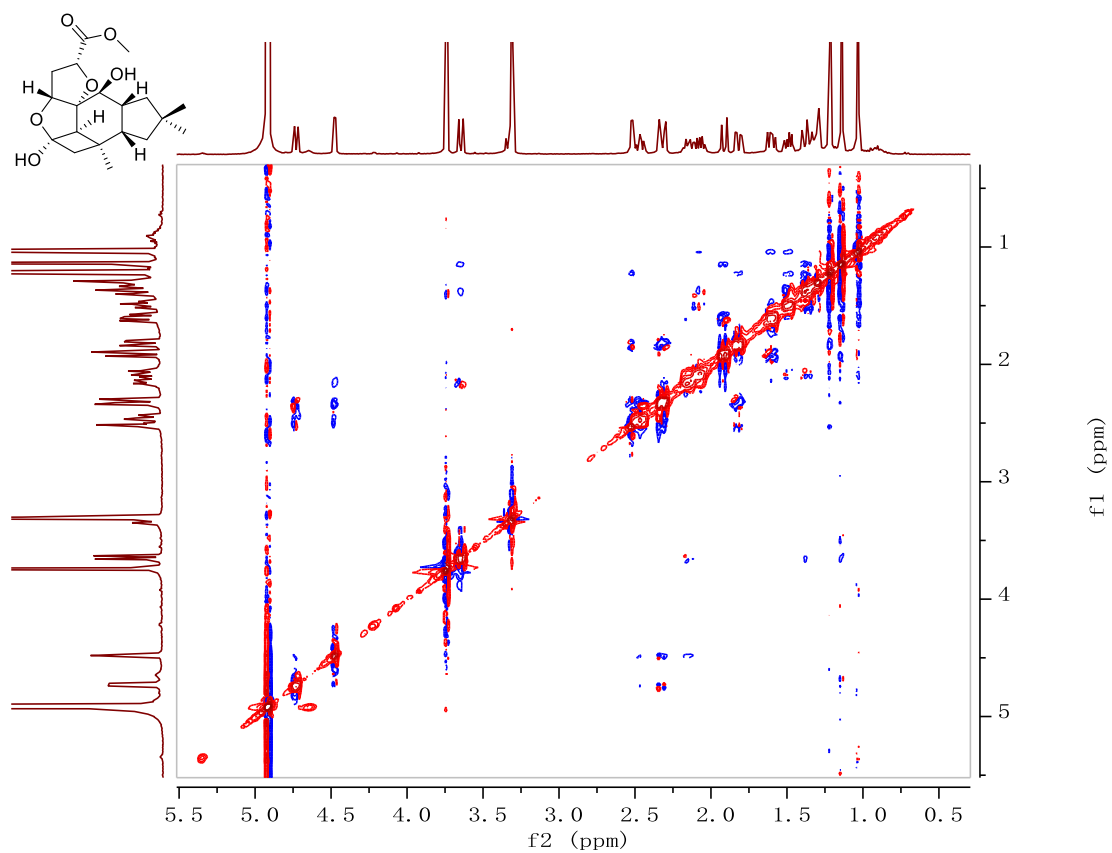

**Figure S24.** ROESY spectrum of epiterenoid B (**2**) in methanol- $d_4$  (400 MHz).

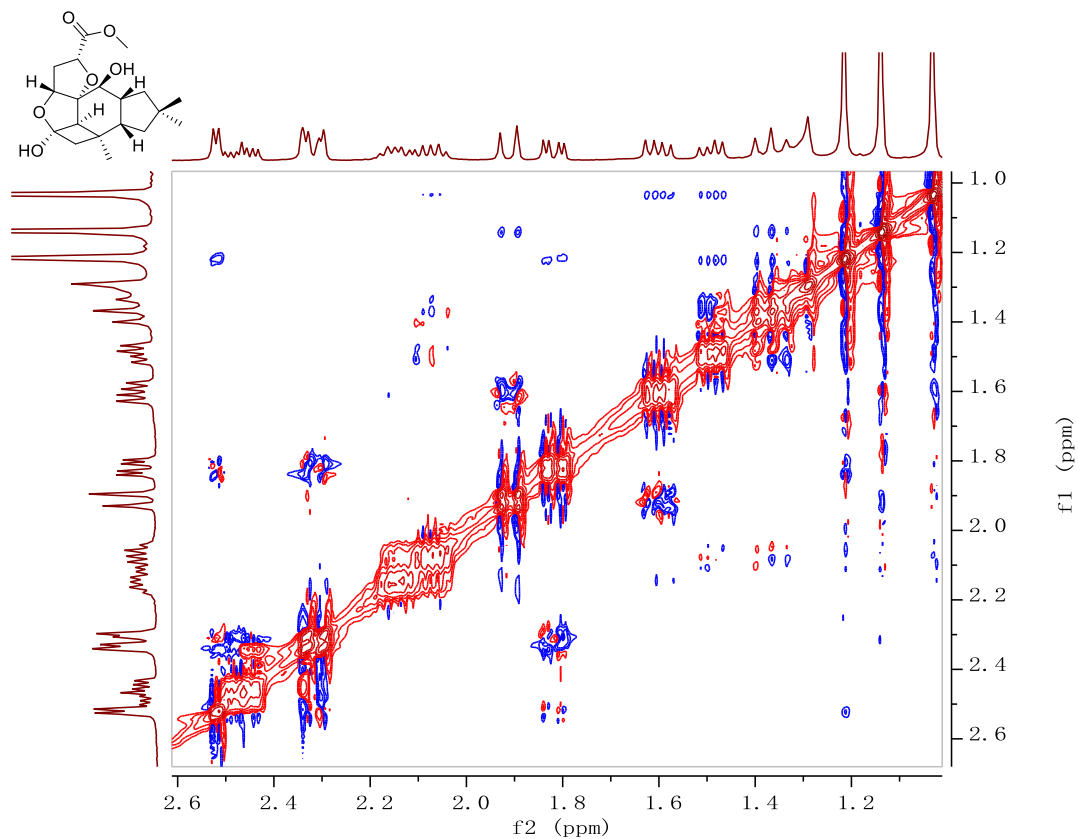

**Figure S25.** Partial enlarged ROESY spectrum of epiterenoid B (**2**) in methanol- $d_4$  (400 MHz).

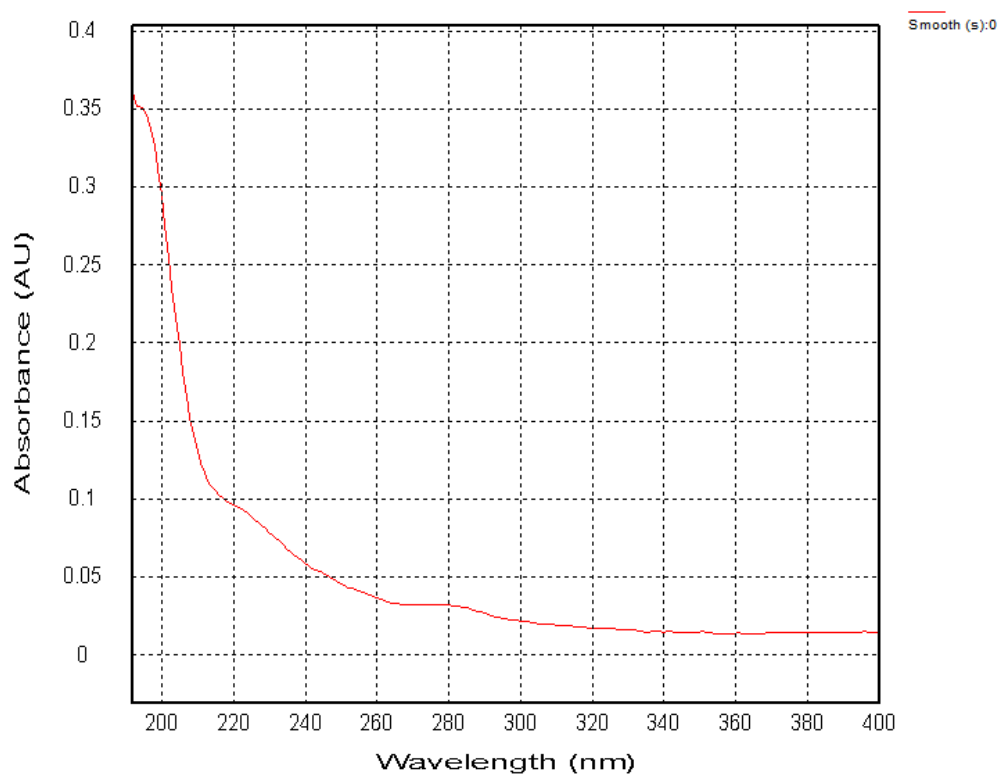

**Figure S26.** UV spectrum of epiterenoid B (**2**) in methanol.

40 #55 RT: 1.07 AV: 1 NL: 3.11E6  
T: FTMS + c ESI Full ms [100.00-400.00]

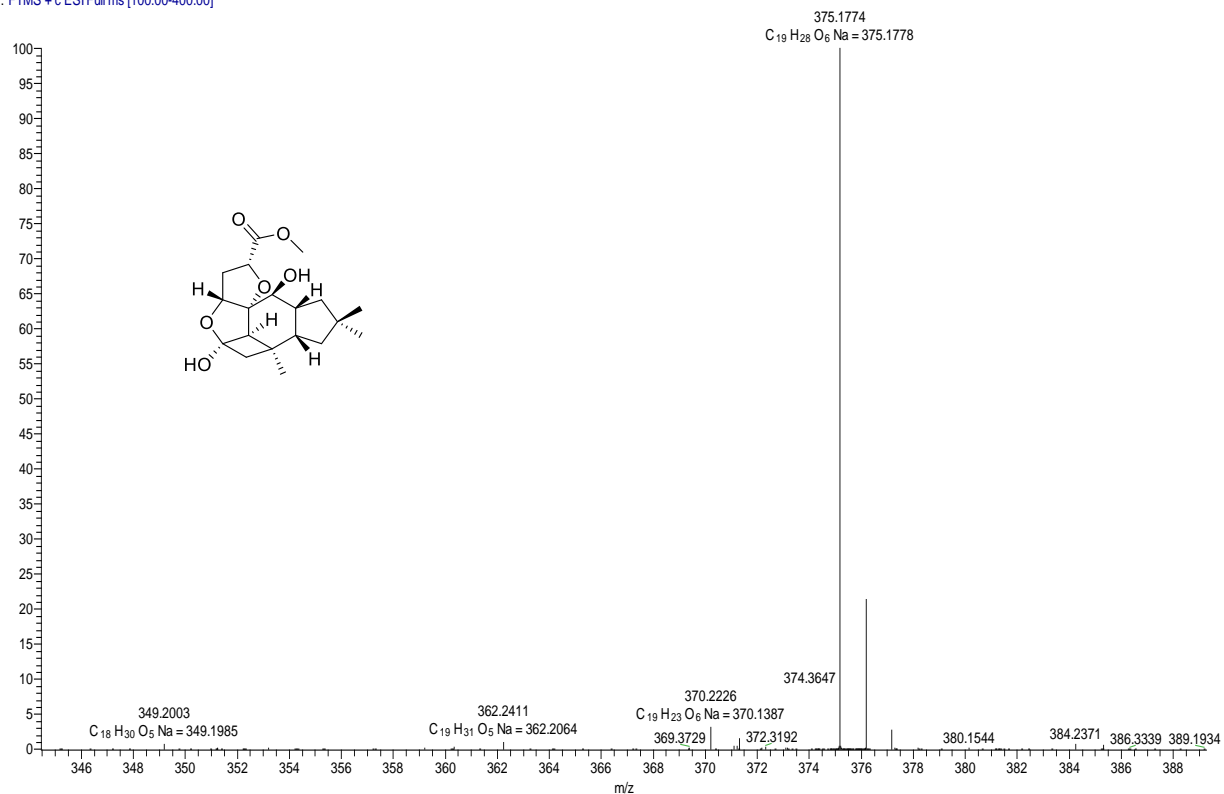

Figure S27. (+)-HRESIMS data of epiterpenoid B (2).

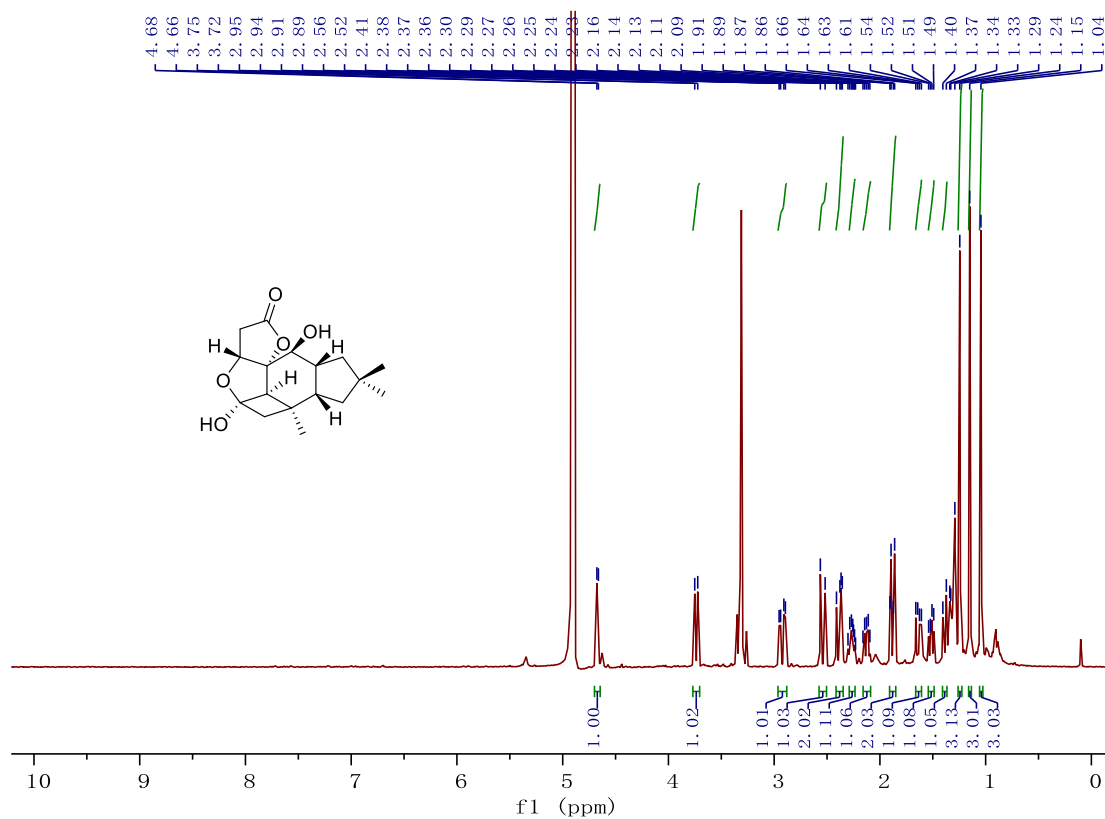

Figure S28. <sup>1</sup>H NMR spectrum of epiterpenoid C (3) in methanol-*d*<sub>4</sub> (400 MHz).

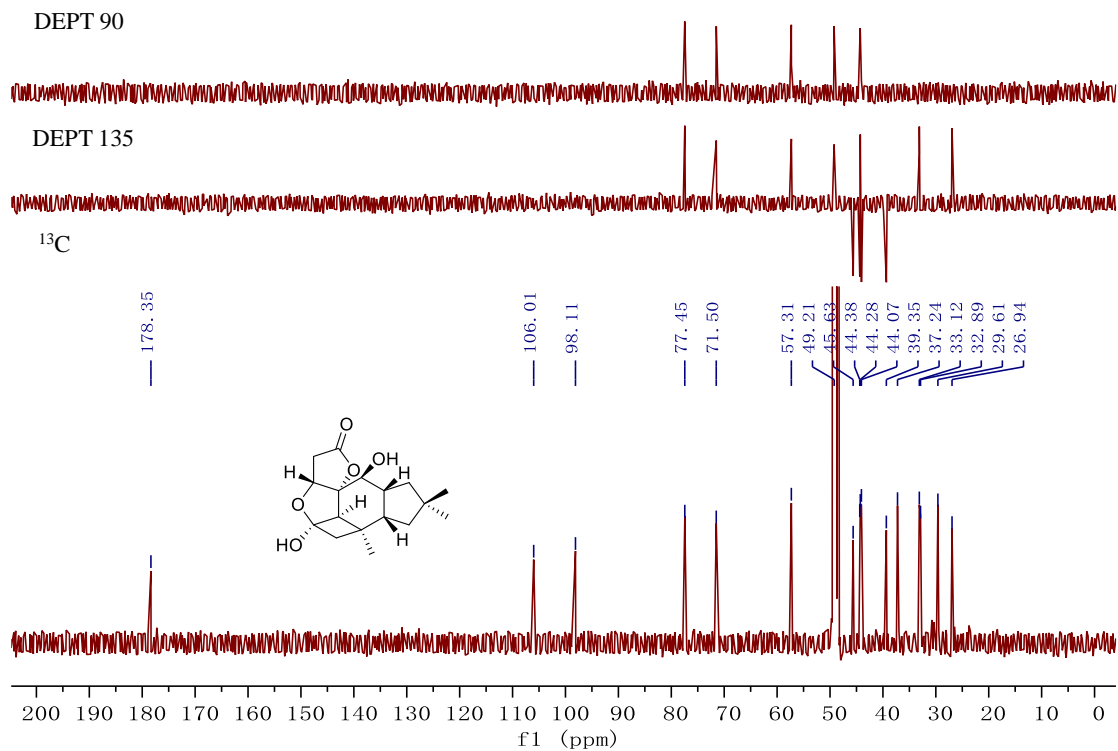

**Figure S29.**  $^{13}\text{C}$  and DEPT NMR spectrum of epiterpenoid C (**3**) in methanol- $d_4$  (100 MHz).

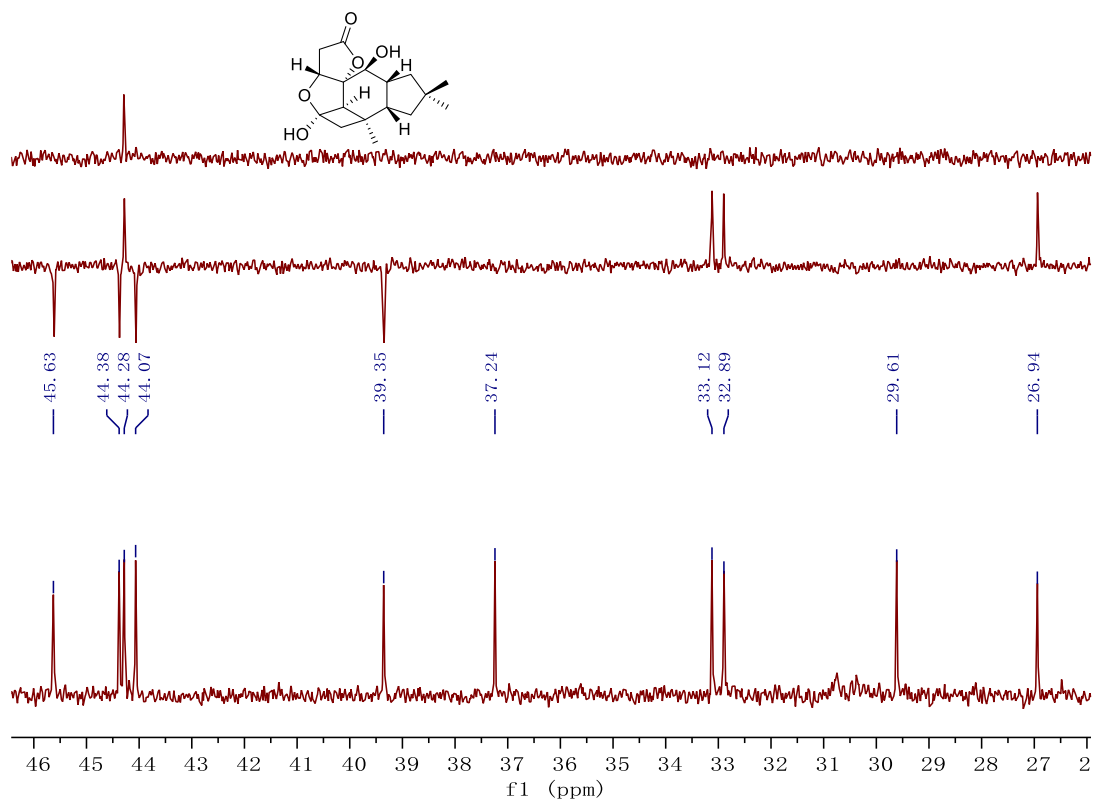

**Figure S30.** Partial enlarged  $^{13}\text{C}$  and DEPT NMR spectrum of epiterpenoid C (**3**) in methanol- $d_4$  (100 MHz).

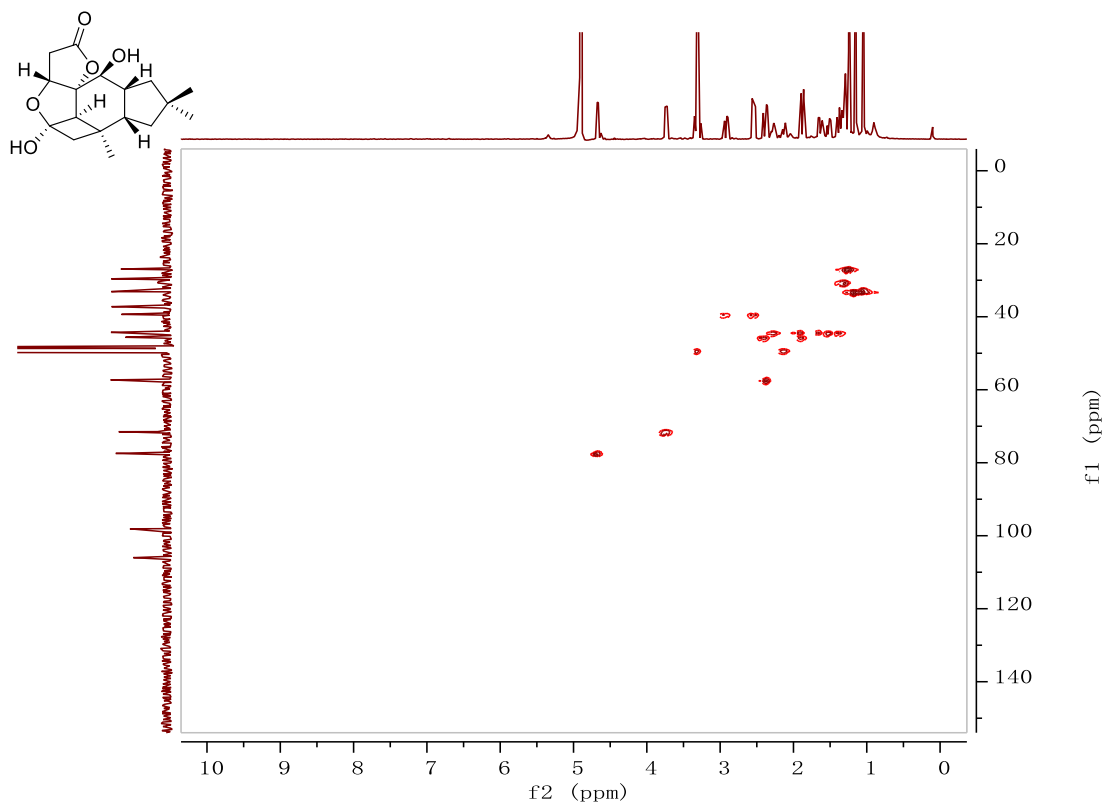

**Figure S31.** HSQC spectrum of epiterenoid C (**3**) in methanol- $d_4$  ( $^1\text{H}$ -400 MHz).

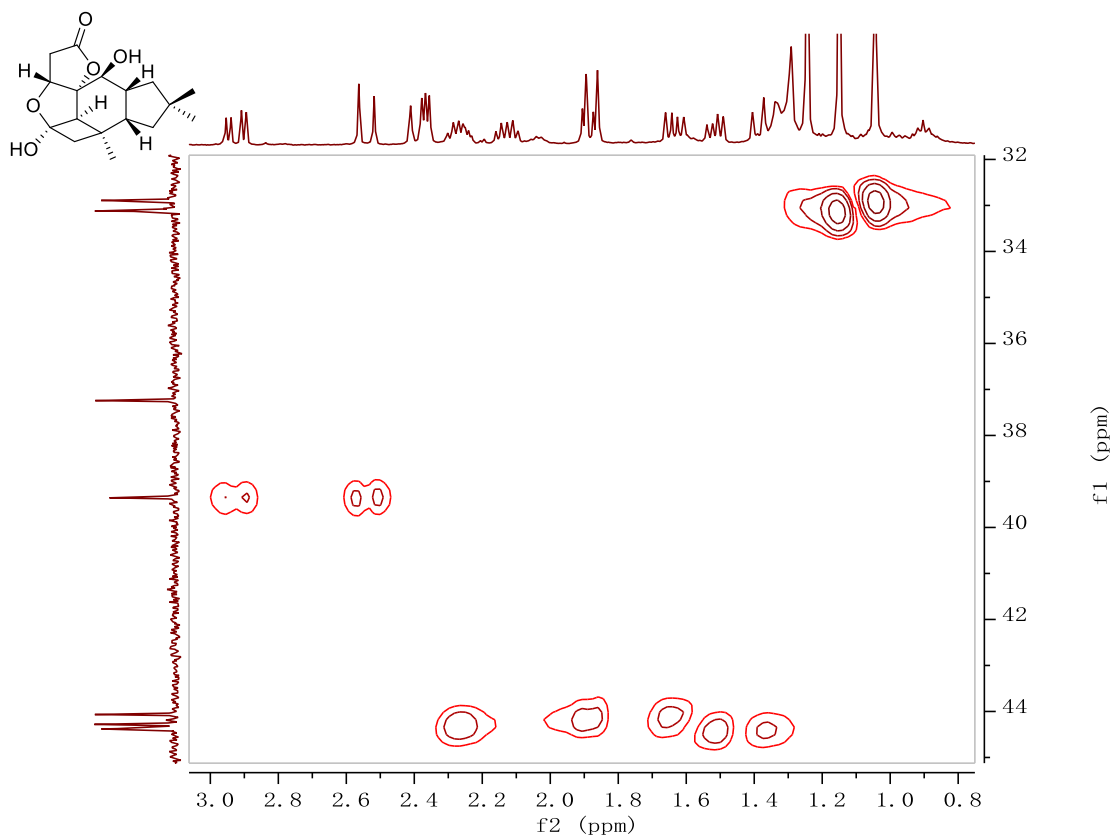

**Figure S32.** Partial enlarged HSQC spectrum of epiterenoid C (**3**) in methanol- $d_4$  ( $^1\text{H}$ -400 MHz).

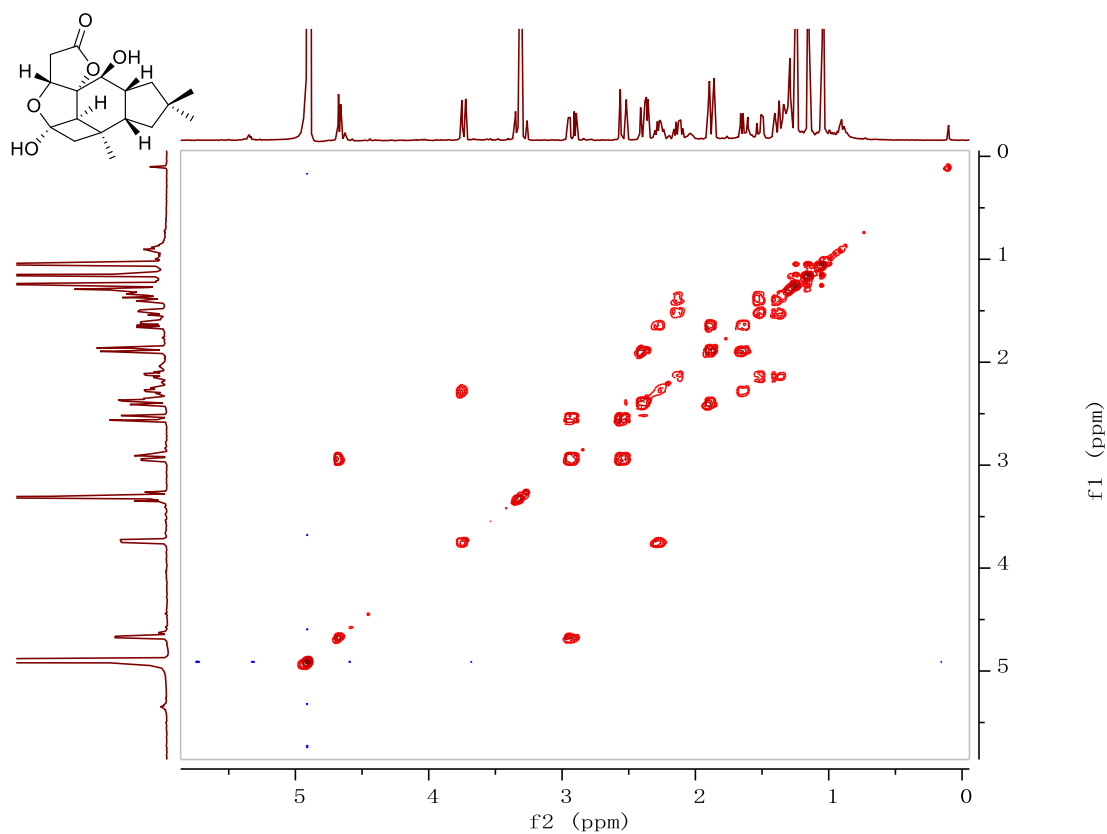

**Figure S33.**  $^1\text{H}$ - $^1\text{H}$  COSY spectrum of epiterenoid C (**3**) in methanol- $d_4$  (400 MHz).

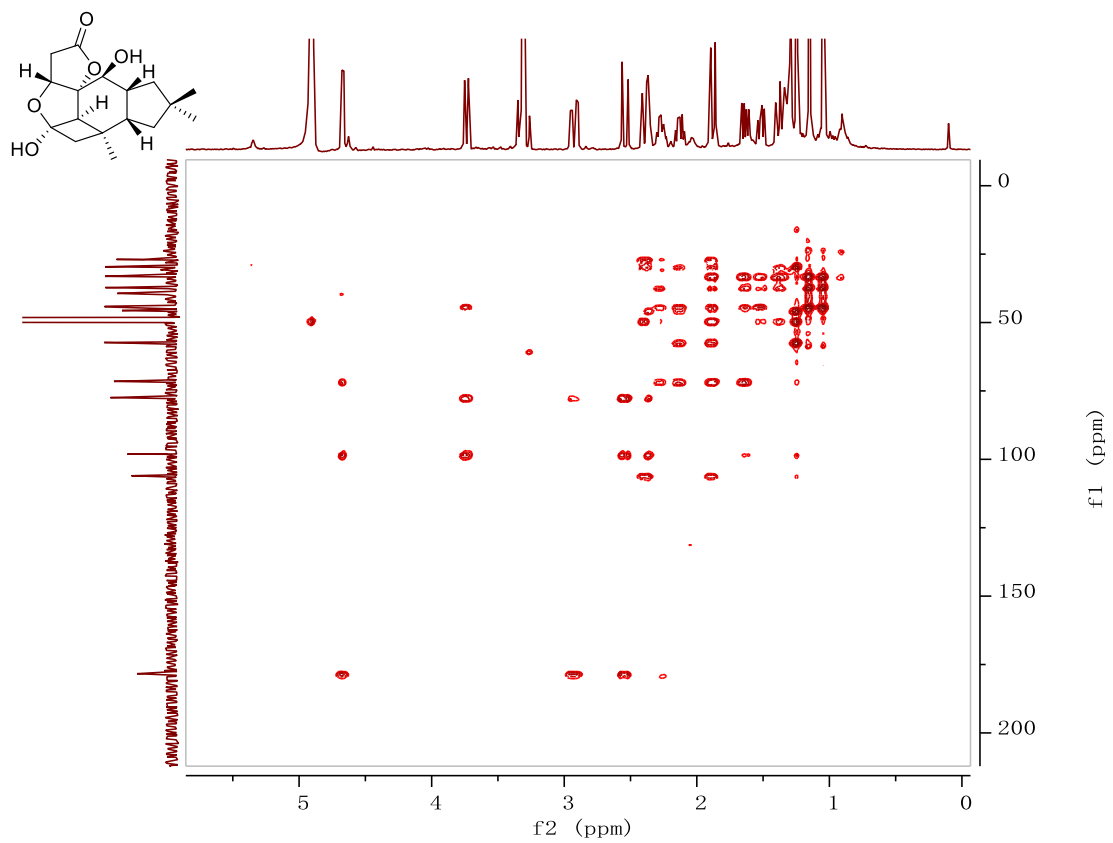

**Figure S34.** HMBC spectrum of epiterenoid C (**3**) in methanol- $d_4$  ( $^1\text{H}$ -400 MHz).

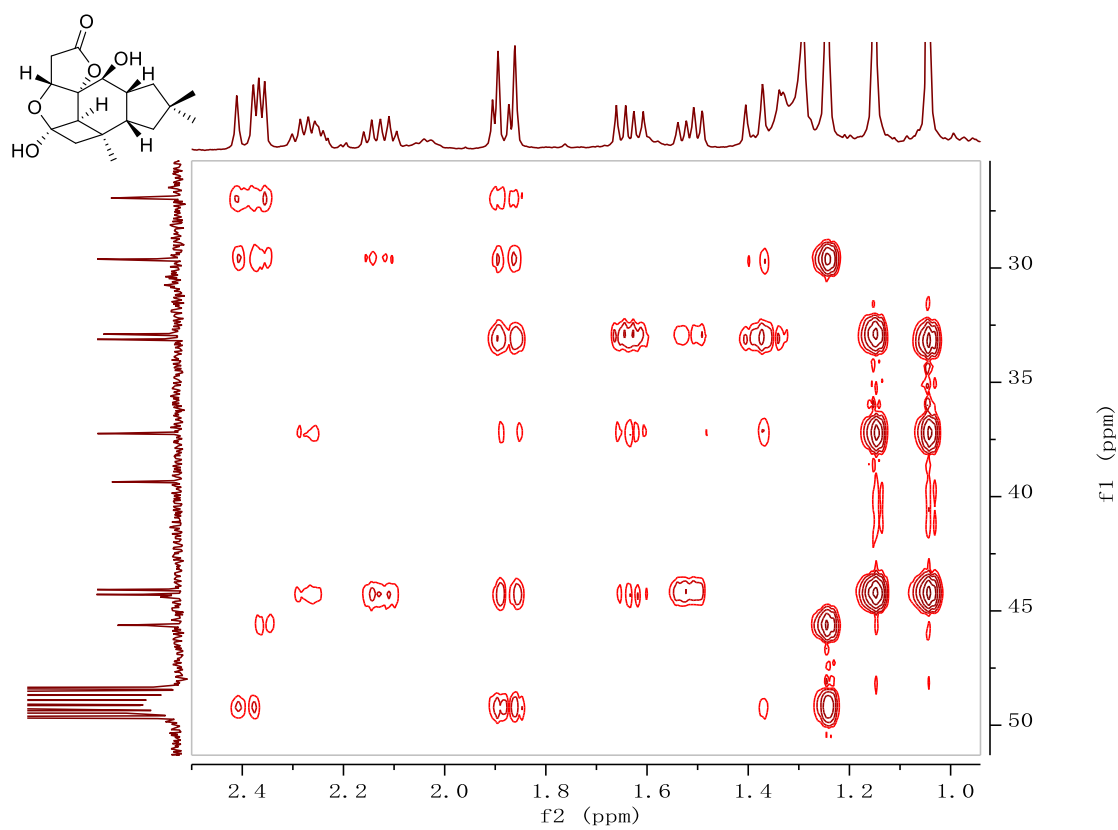

**Figure S35.** Partial enlarged HMBC spectrum of epiterenoid C (**3**) in methanol- $d_4$  ( $^1\text{H}$ -400 MHz).

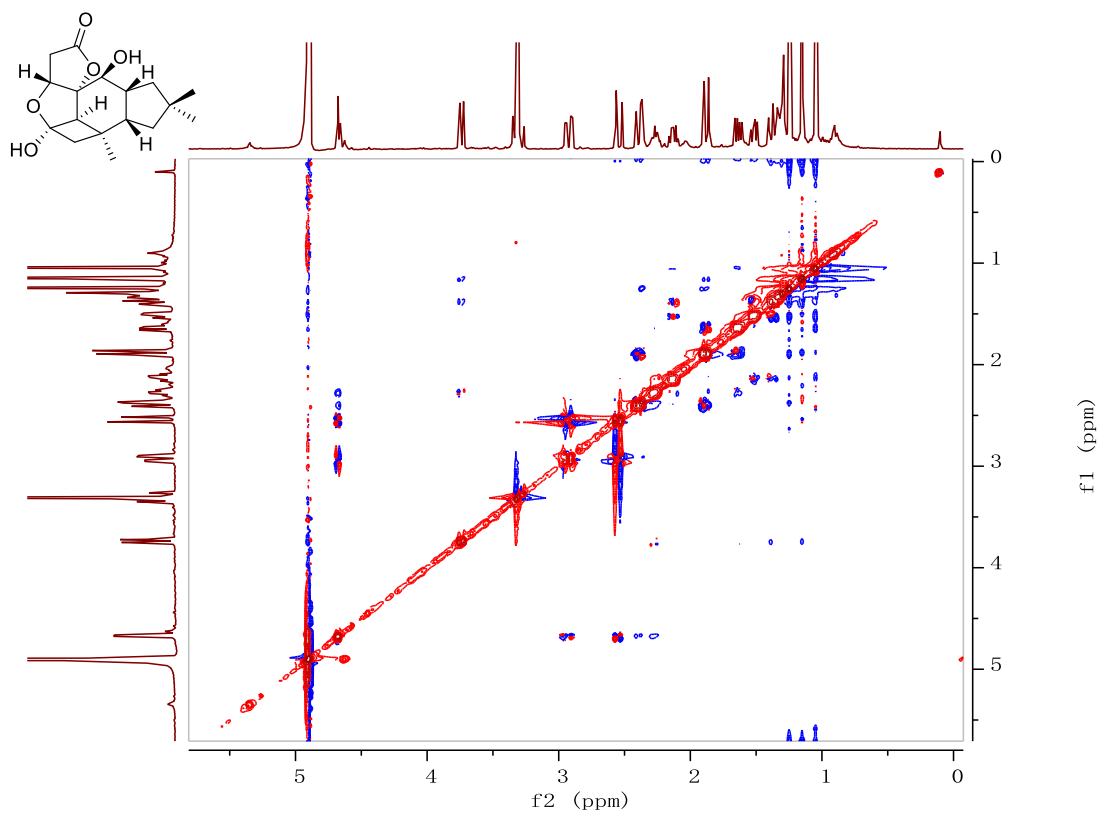

**Figure S36.** ROESY spectrum of epiterenoid C (**3**) in methanol- $d_4$  (400 MHz).

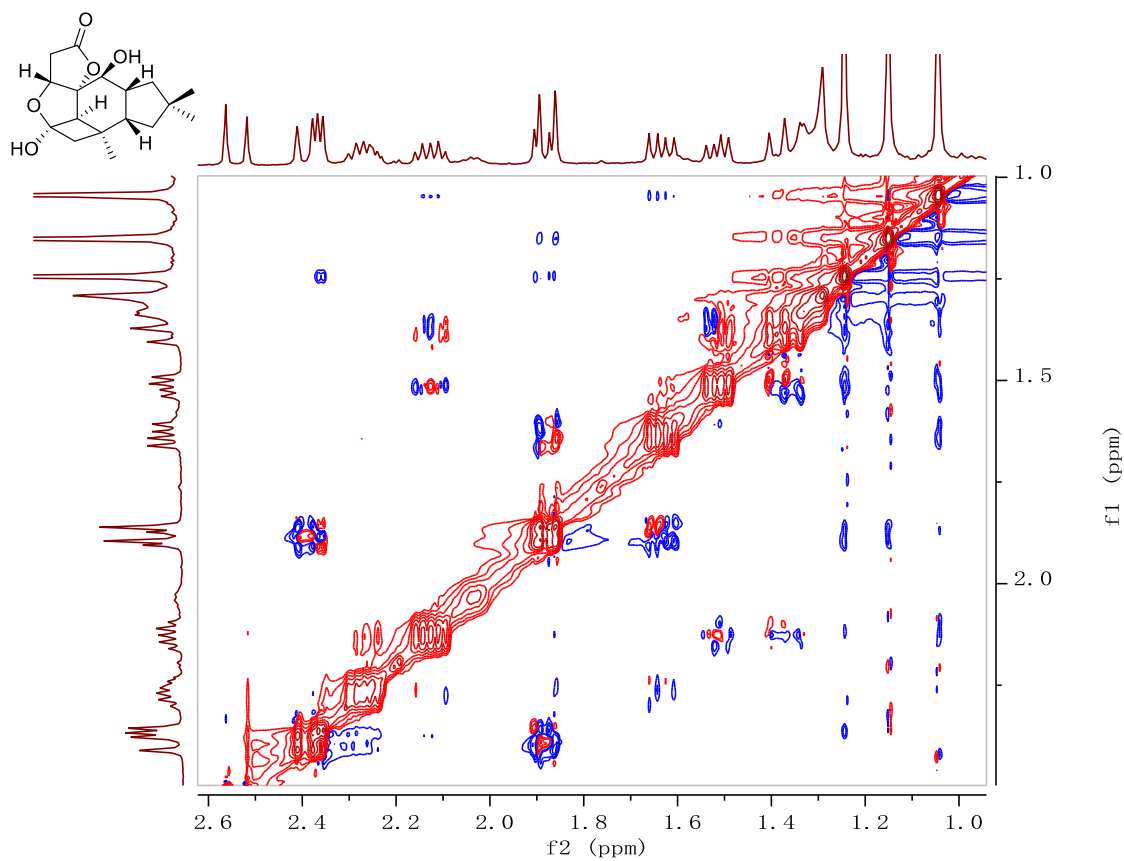

**Figure S37.** Partial enlarged ROESY spectrum of epiterenoid C (**3**) in methanol- $d_4$  (400 MHz).

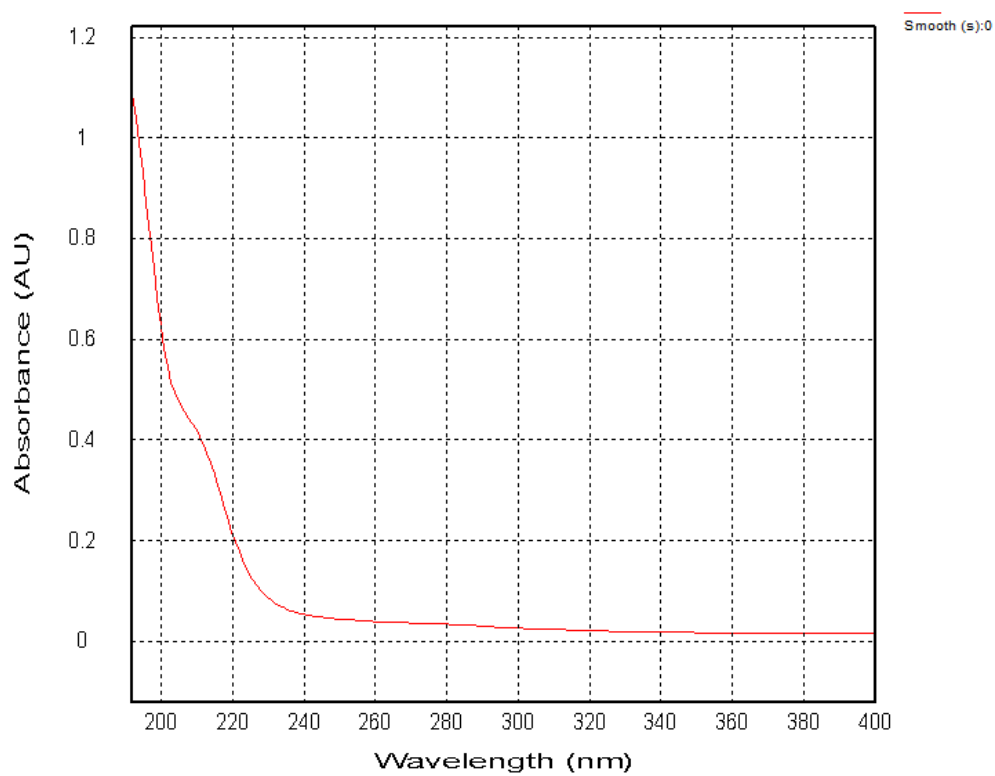

**Figure S38.** UV spectrum of epiterenoid C (**3**) in methanol.



38 #51 RT: 1.01 AV: 1 NL: 1.26E6  
T: FTMS + c ESI Full ms [100.00-400.00]

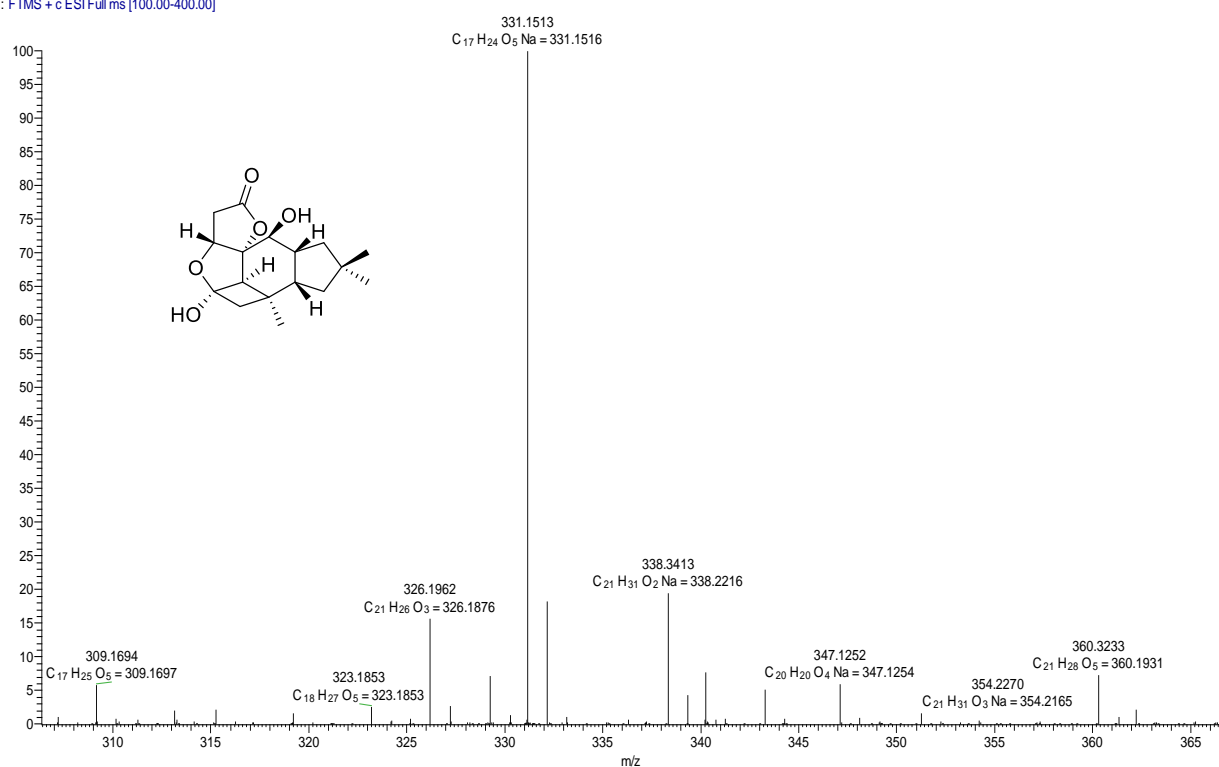

**Figure S39.** (+)-HRESIMS data of epiterenoid C (**3**).

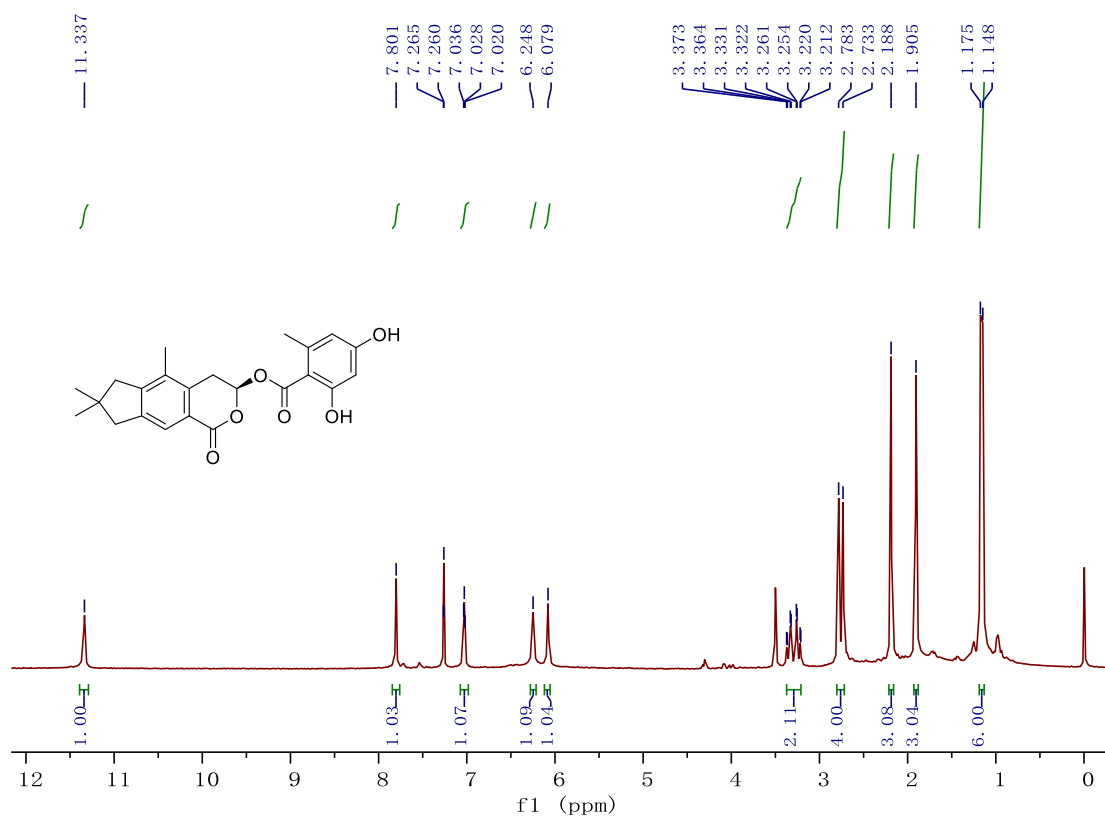

**Figure S40.** <sup>1</sup>H NMR spectrum of arniloid A (**4**) in methanol-*d*<sub>4</sub> (400 MHz).

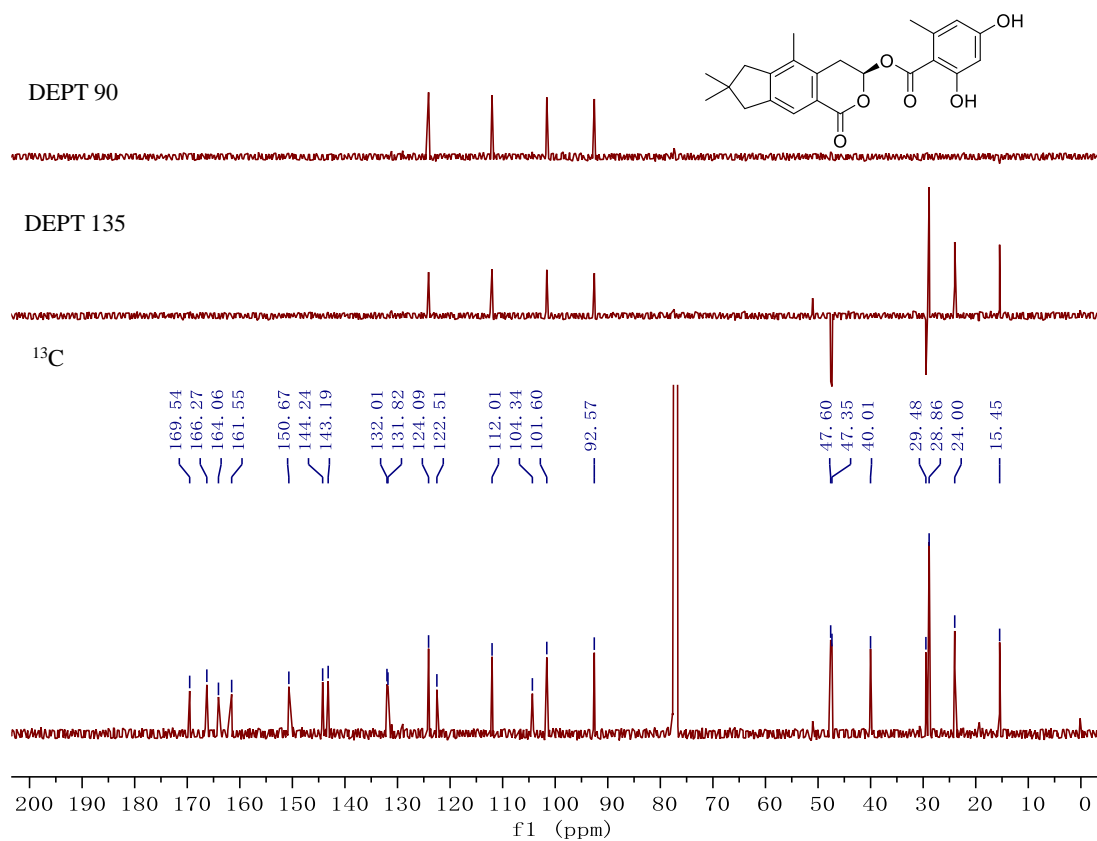

**Figure S41.**  $^{13}\text{C}$  and DEPT NMR spectrum of armiloid A (**4**) in methanol- $d_4$  (100 MHz).

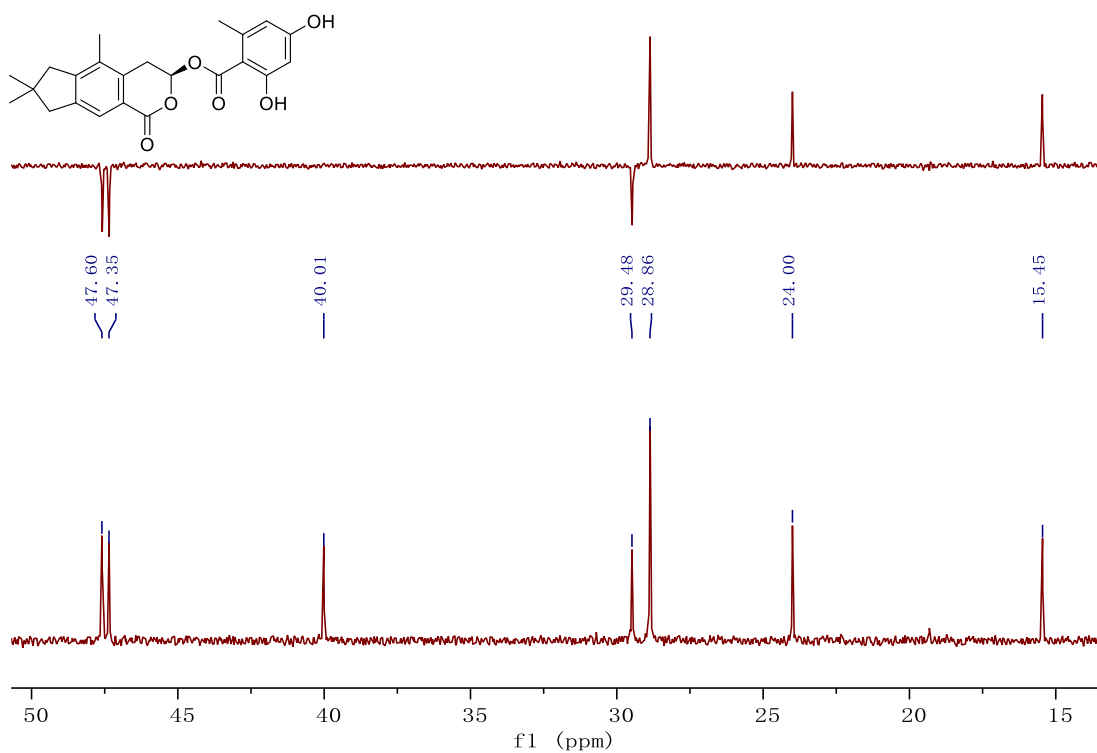

**Figure S42.** Partial enlarged  $^{13}\text{C}$  and DEPT NMR of armiloid A (**4**) in methanol- $d_4$  (100 MHz).

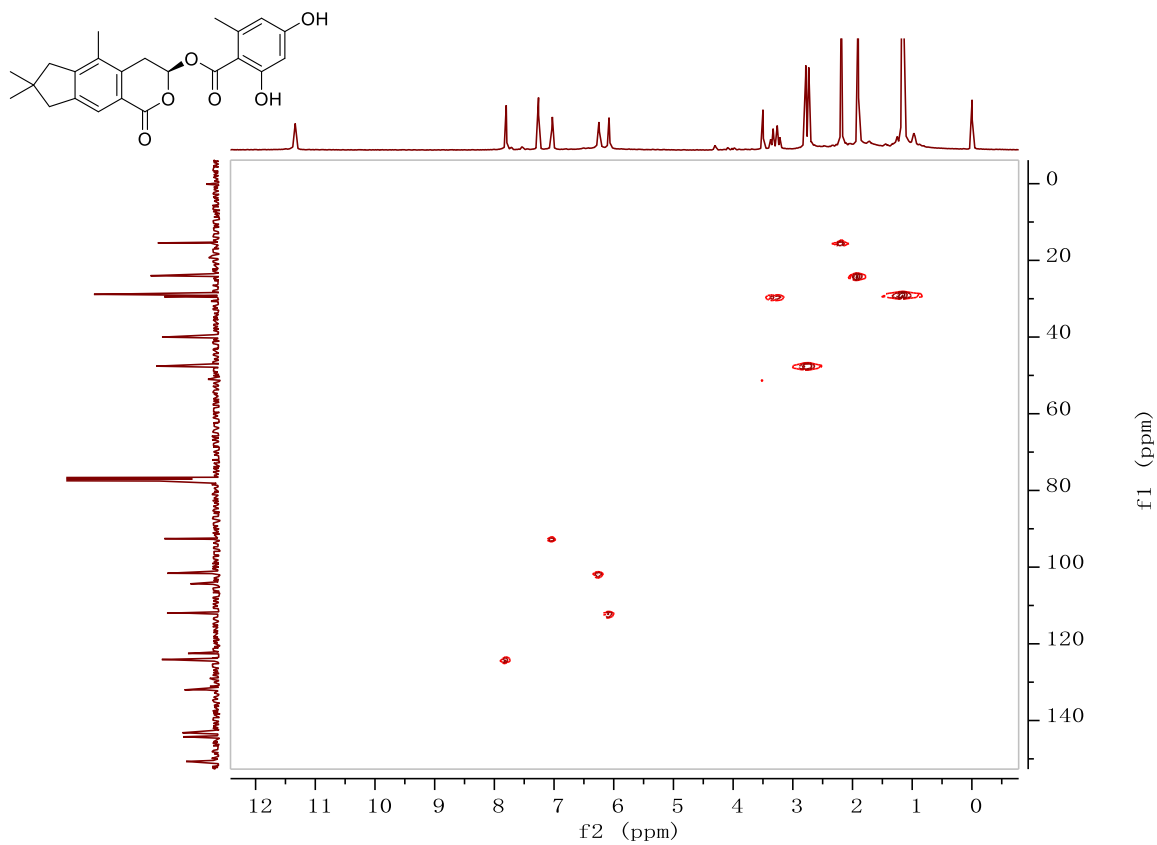

**Figure S43.** HSQC spectrum of arniloid A (**4**) in methanol- $d_4$  ( $^1\text{H}$ -400 MHz).

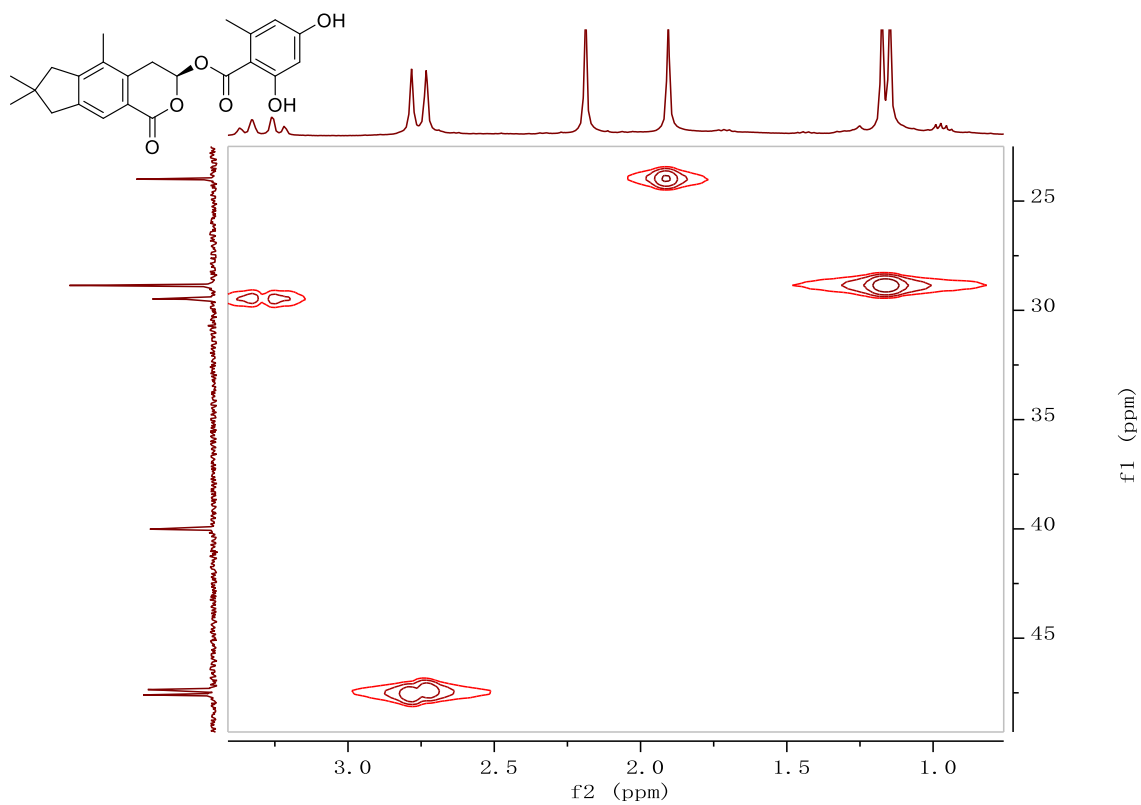

**Figure S44.** Partial enlarged HSQC spectrum of arniloid A (**4**) in methanol- $d_4$  ( $^1\text{H}$ -400 MHz).

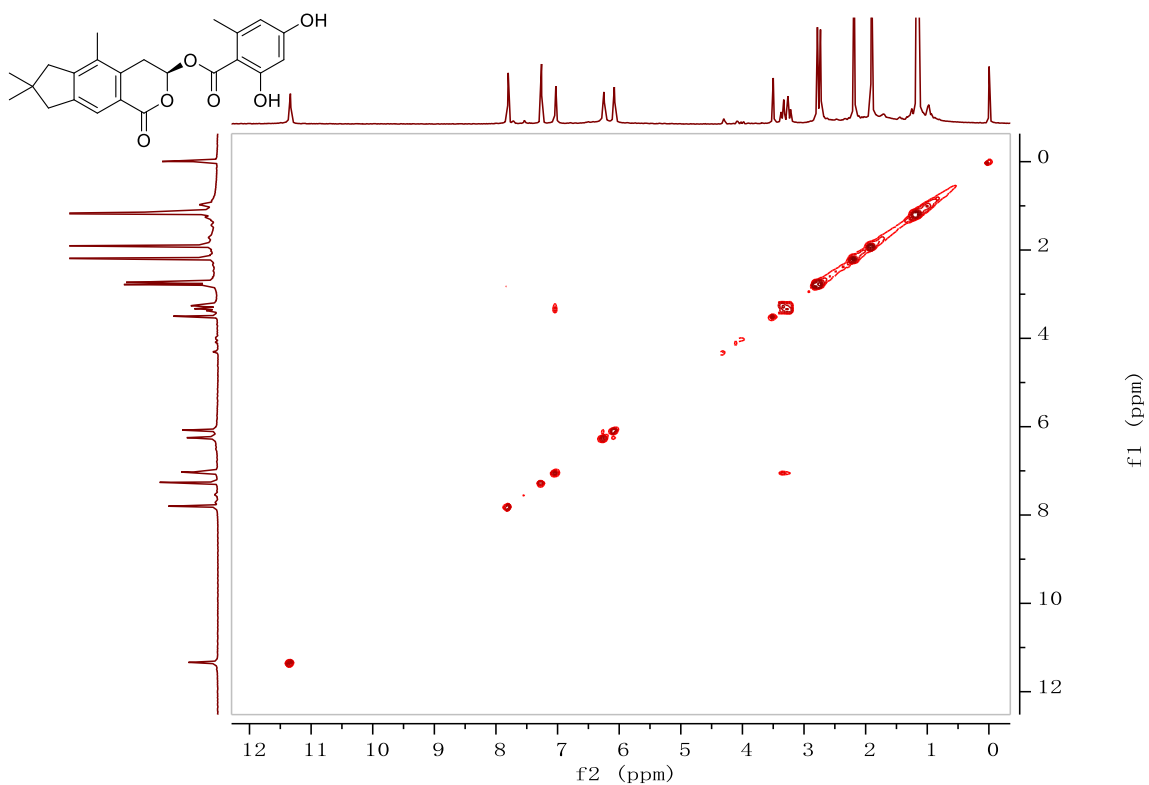

**Figure S45.**  $^1\text{H}$ - $^1\text{H}$  COSY spectrum of arniloid A (**4**) in methanol- $d_4$  (400 MHz).

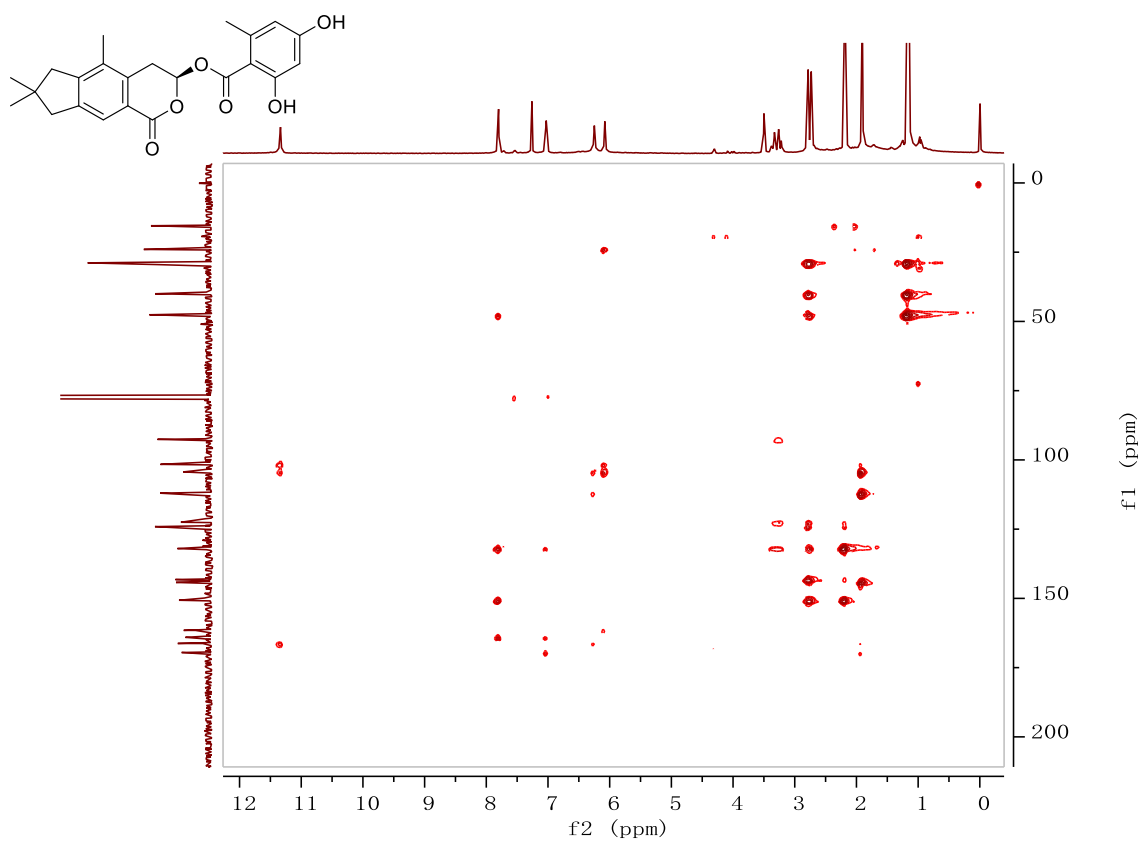

**Figure S46.** HMBC spectrum of arniloid A (**4**) in methanol- $d_4$  ( $^1\text{H}$ -400 MHz).

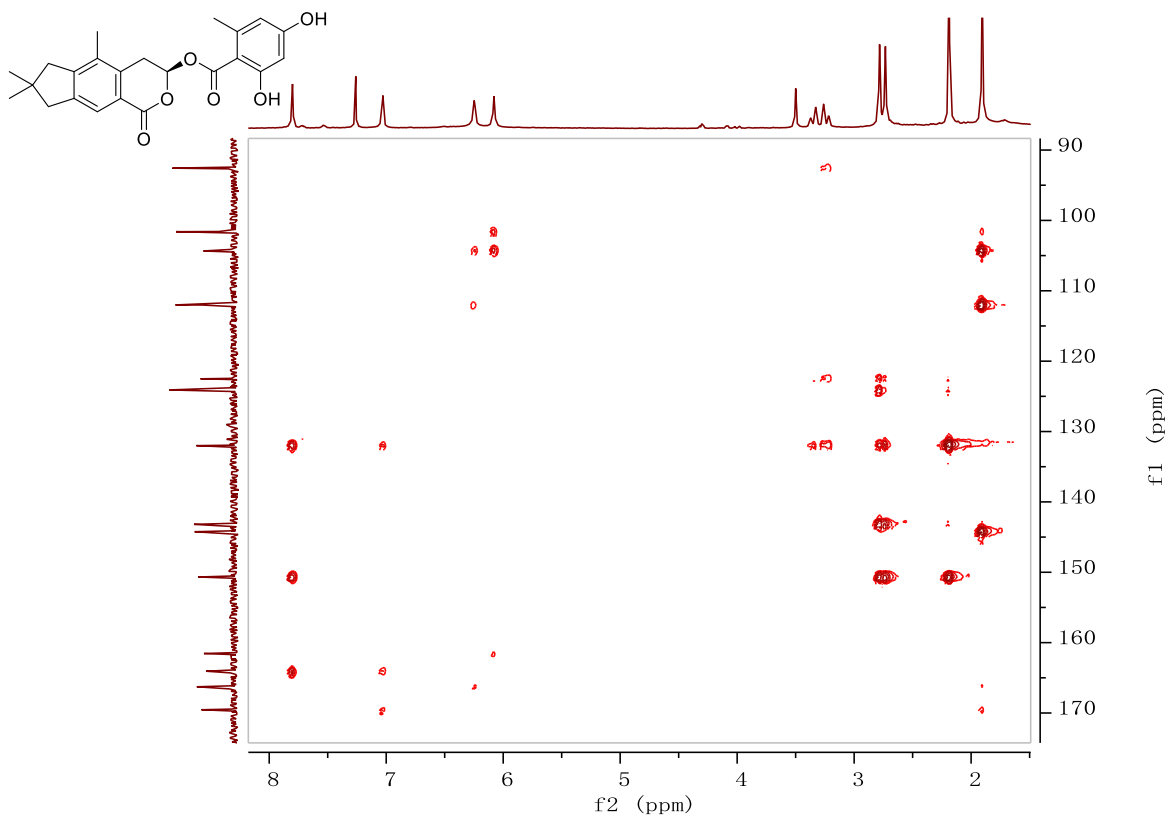

**Figure S47.** Partial enlarged HMBC spectrum of arniloid A (**4**) in methanol- $d_4$  ( $^1\text{H}$ -400 MHz).

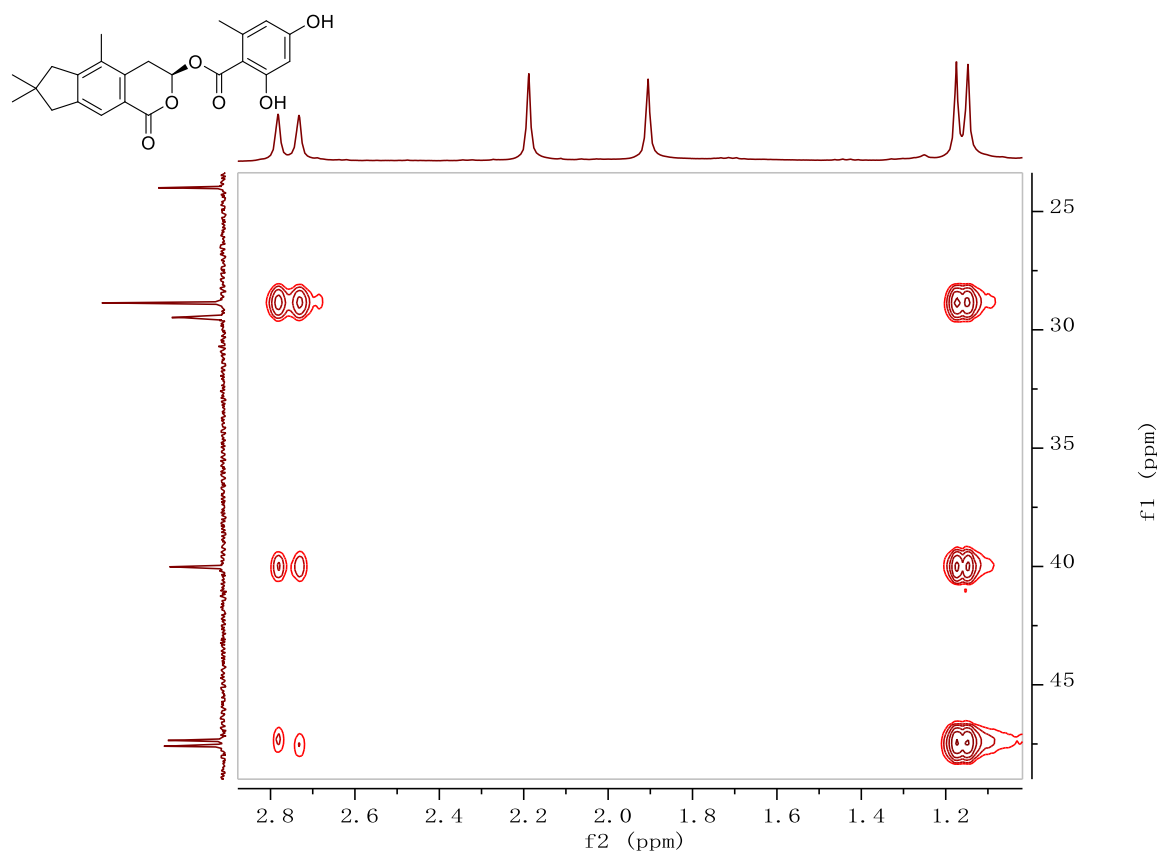

**Figure S48.** Partial enlarged HMBC spectrum of arniloid A (**4**) in methanol- $d_4$  ( $^1\text{H}$ -400 MHz).

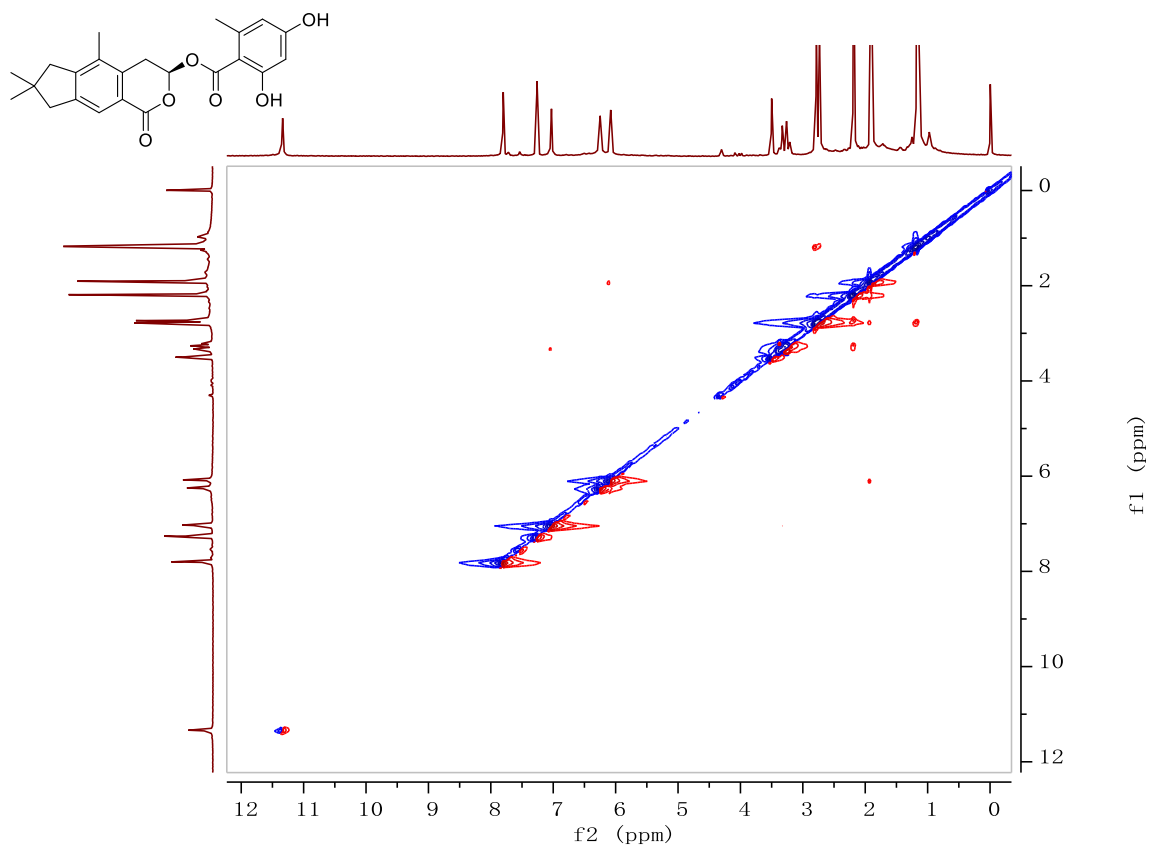

**Figure S49.** ROESY spectrum of arniloid A (**4**) in methanol-*d*<sub>4</sub> (400 MHz).

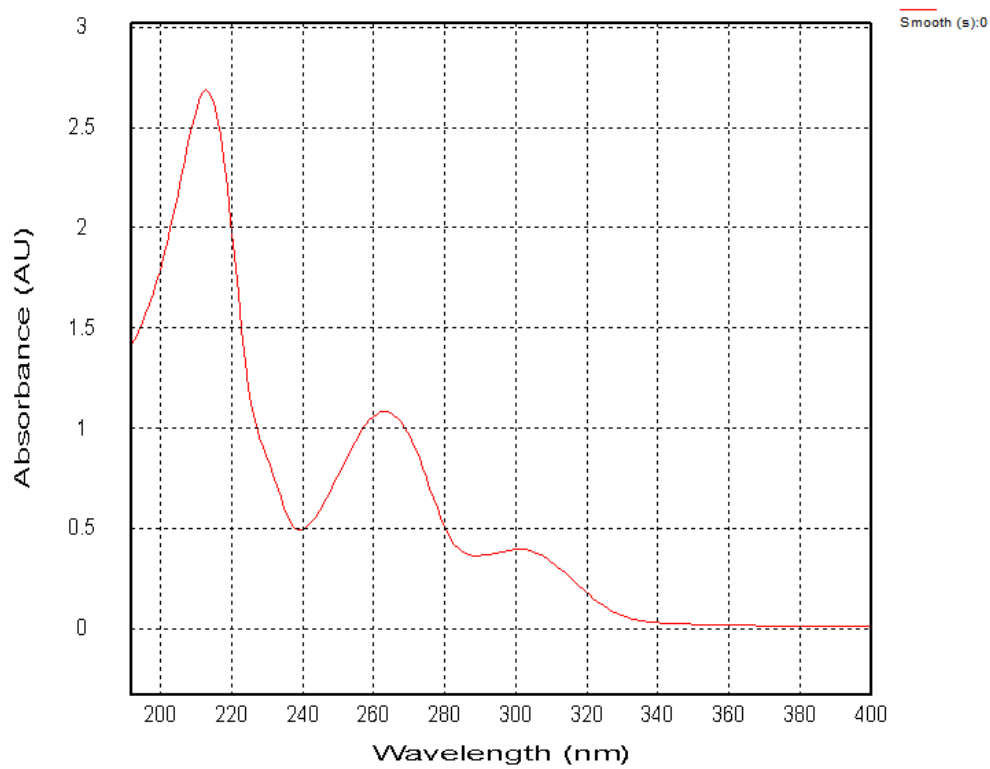

**Figure S50.** UV spectrum of arniloid A (**4**) in methanol.

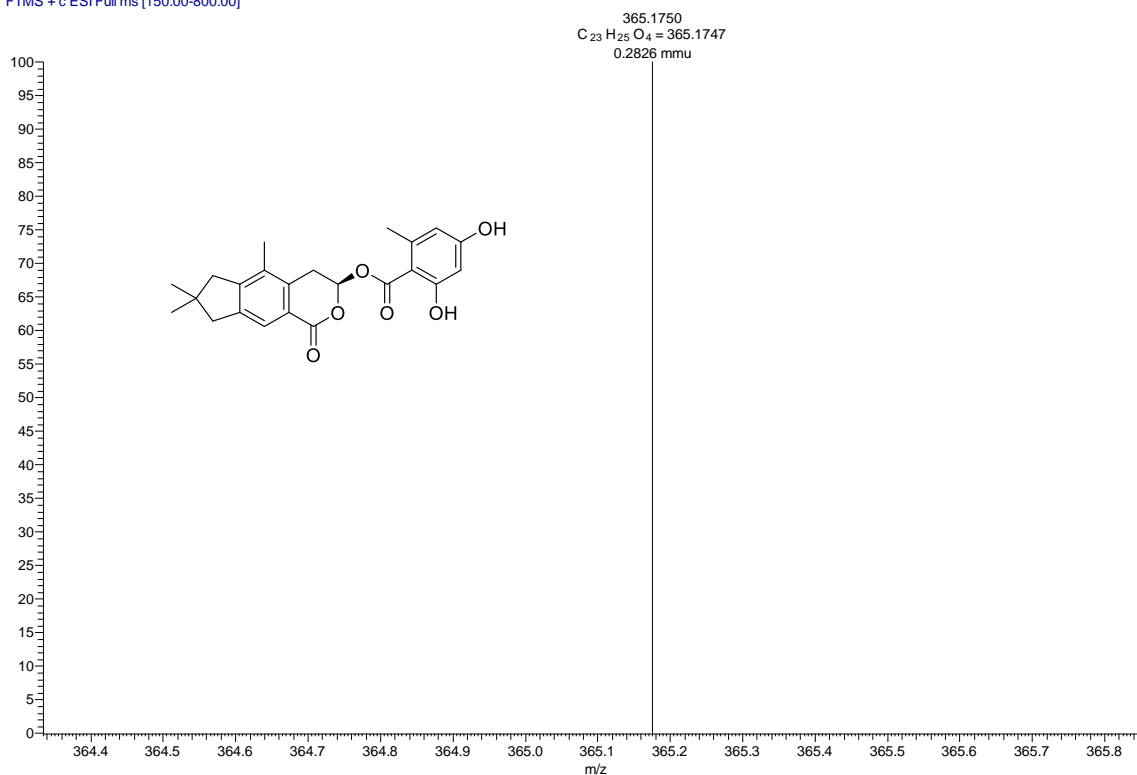

**Figure S51.** (+)-HRESIMS data of armiloid A (**4**).

### ECD calculation details for compounds 1-4

The ECD spectra were simulated by overlapping Gaussian functions for each transition according to:

$$\Delta\varepsilon(E) = \frac{1}{2.296 \times 10^{-39} \sqrt{\pi} \sigma} \sum_i^A \Delta E_i R_i e^{[-(E - \Delta E_i)^2 / \sigma^2]}$$

The  $\sigma$  represented the width of the band at  $1/e$  height, and  $\Delta E_i$  and  $R_i$  were the excitation energies and rotational strengths for transition  $i$ , respectively.  $R_{\text{vel}}$  had been used in this work.

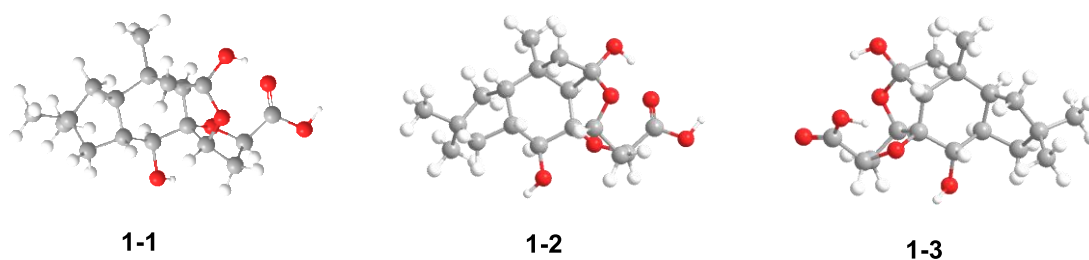

**Figure S52.** Optimized geometries of predominant conformers for **1**.

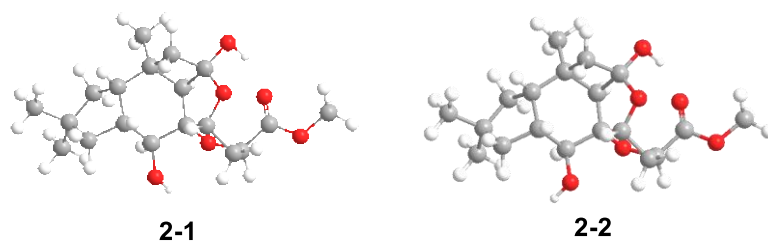

**Figure S53.** Optimized geometries of predominant conformers for 2.

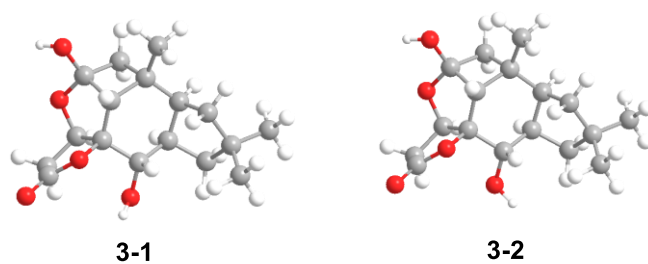

**Figure S54.** Optimized geometries of predominant conformers for 3.

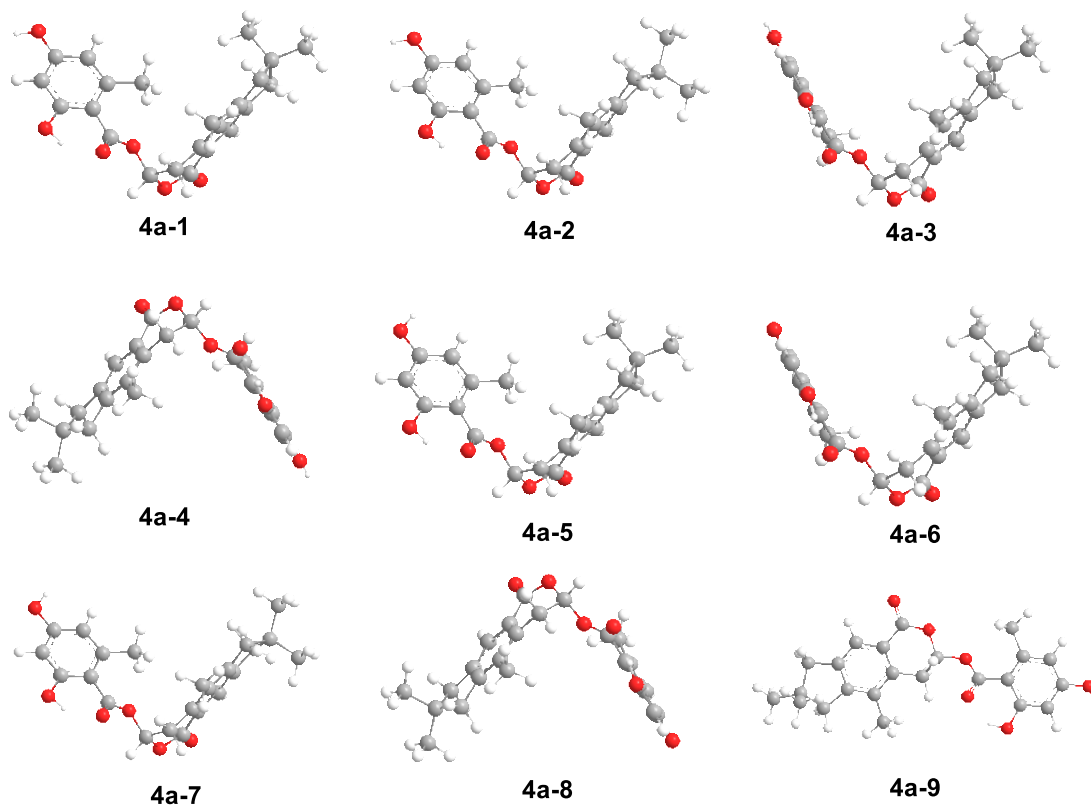

**Figure S55.** Optimized geometries of predominant conformers for (1*S*)-4a.



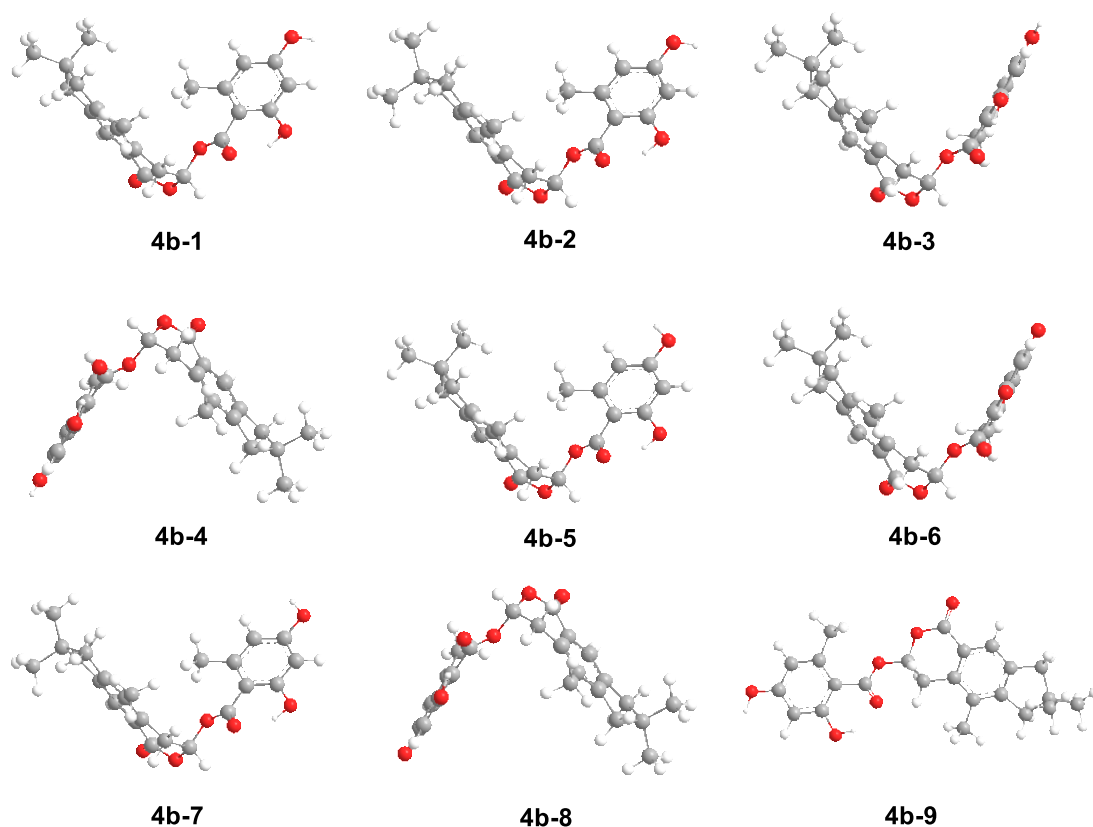

**Figure S56.** Optimized geometries of predominant conformers for (1*R*)-**4b**.

**Table S2. Important Thermodynamic Parameters (a.u.) and Boltzmann Distributions of the Optimized Compounds 1-4 at B3LYP/6-311G (d, p) Level in Methanol**

| Conformations         | Species     | Gibbers      | Ratio (%) |
|-----------------------|-------------|--------------|-----------|
| <b>1</b>              | <b>1-1</b>  | -1152.752780 | 92.20     |
|                       | <b>1-2</b>  | -1152.750789 | 5.47      |
|                       | <b>1-3</b>  | -1152.751728 | 1.60      |
| <b>2</b>              | <b>2-1</b>  | -1192.056286 | 93.92     |
|                       | <b>2-2</b>  | -1192.054195 | 6.00      |
| <b>3</b>              | <b>3-1</b>  | -1038.205386 | 59.40     |
|                       | <b>3-2</b>  | -1038.203327 | 46.60     |
| <b>(1<i>S</i>)-4a</b> | <b>4a-1</b> | -1342.209717 | 34.93     |
|                       | <b>4a-2</b> | -1342.209742 | 17.66     |
|                       | <b>4a-3</b> | -1342.209719 | 17.38     |
|                       | <b>4a-4</b> | -1342.209743 | 10.75     |
|                       | <b>4a-5</b> | -1342.209412 | 5.26      |
|                       | <b>4a-6</b> | -1342.209412 | 3.58      |
|                       | <b>4a-7</b> | -1342.209356 | 2.64      |
|                       | <b>4a-8</b> | -1342.209335 | 2.22      |
|                       | <b>4a-9</b> | -1342.209352 | 1.06      |

|                |             |              |       |
|----------------|-------------|--------------|-------|
| <b>(1R)-4b</b> | <b>4b-1</b> | -1342.209717 | 34.93 |
|                | <b>4b-2</b> | -1342.209742 | 17.66 |
|                | <b>4b-3</b> | -1342.209719 | 17.38 |
|                | <b>4b-4</b> | -1342.209743 | 10.75 |
|                | <b>4b-5</b> | -1342.209412 | 5.26  |
|                | <b>4b-6</b> | -1342.209412 | 3.58  |
|                | <b>4b-7</b> | -1342.209356 | 2.64  |
|                | <b>4b-8</b> | -1342.209335 | 2.22  |
|                | <b>4b-9</b> | -1342.209352 | 1.06  |

**Table S3. Cartesian Coordinates of the Lowest Energy Conformers for Compounds 1-4**

| <b>1-1</b> |             |             |             |
|------------|-------------|-------------|-------------|
| Atom       | X           | Y           | Z           |
| C          | 0.52710000  | -0.57470000 | -0.03770000 |
| C          | 0.36090000  | 0.88150000  | -0.46840000 |
| C          | -0.86720000 | 1.71700000  | 0.00460000  |
| C          | -2.13030000 | 0.92550000  | 0.36940000  |
| C          | -1.85910000 | -0.50090000 | 0.87320000  |
| C          | -0.83590000 | -1.27230000 | 0.01500000  |
| C          | -3.07890000 | 0.67900000  | -0.80990000 |
| C          | -4.01660000 | -0.45210000 | -0.33580000 |
| C          | -3.25390000 | -1.15240000 | 0.81550000  |
| C          | 1.32260000  | -0.59320000 | 1.27450000  |
| O          | 1.98030000  | 0.67730000  | 1.34760000  |
| C          | 1.25090000  | 1.63000000  | 0.54860000  |
| O          | 1.34630000  | -1.26670000 | -1.01840000 |
| C          | 2.61460000  | -1.58990000 | -0.42550000 |
| C          | 2.36440000  | -1.66620000 | 1.06960000  |
| C          | -0.02760000 | 2.18370000  | 1.22580000  |
| C          | 3.70670000  | -0.56570000 | -0.75700000 |
| O          | 3.56100000  | 0.52670000  | -1.28620000 |
| O          | 4.93660000  | -0.98650000 | -0.39160000 |
| H          | 0.73280000  | -0.72670000 | 2.18460000  |
| O          | 2.13110000  | 2.61280000  | -0.01010000 |
| C          | -1.16210000 | 2.92050000  | -0.90640000 |
| H          | -2.68570000 | 1.47920000  | 1.13970000  |
| H          | -1.52130000 | -0.49340000 | 1.91600000  |
| C          | -4.31980000 | -1.42500000 | -1.48130000 |
| C          | -5.34190000 | 0.12830000  | 0.18320000  |
| O          | -0.67550000 | -2.59100000 | 0.54890000  |
| H          | 0.61330000  | 1.04470000  | -1.52350000 |

|   |             |             |             |
|---|-------------|-------------|-------------|
| H | -1.21430000 | -1.40140000 | -1.00550000 |
| H | -3.63190000 | 1.58630000  | -1.07840000 |
| H | -2.51510000 | 0.37880000  | -1.70190000 |
| H | -3.75990000 | -0.97340000 | 1.77320000  |
| H | -3.20710000 | -2.23930000 | 0.68990000  |
| H | 2.93620000  | -2.55250000 | -0.83700000 |
| H | 3.26720000  | -1.51120000 | 1.66790000  |
| H | 1.93930000  | -2.64480000 | 1.31860000  |
| H | -0.01880000 | 3.26340000  | 1.41230000  |
| H | -0.27520000 | 1.69520000  | 2.17580000  |
| H | 5.52960000  | -0.24450000 | -0.63580000 |
| H | 2.78370000  | 2.06850000  | -0.49610000 |
| H | -1.50560000 | 2.59800000  | -1.89460000 |
| H | -1.93320000 | 3.56200000  | -0.46590000 |
| H | -0.27160000 | 3.53830000  | -1.06770000 |
| H | -4.97980000 | -2.23330000 | -1.14720000 |
| H | -4.81290000 | -0.91080000 | -2.31380000 |
| H | -3.40550000 | -1.88540000 | -1.87020000 |
| H | -5.88640000 | 0.64420000  | -0.61570000 |
| H | -5.99160000 | -0.66270000 | 0.57420000  |
| H | -5.17390000 | 0.85120000  | 0.98930000  |
| H | -0.16580000 | -3.08800000 | -0.11860000 |

| <b>1-2</b> |             |             |             |
|------------|-------------|-------------|-------------|
| Atom       | X           | Y           | Z           |
| C          | 0.52460000  | -0.57280000 | -0.02840000 |
| C          | 0.35400000  | 0.88510000  | -0.45220000 |
| C          | -0.86720000 | 1.72390000  | 0.02200000  |
| C          | -2.13280000 | 0.93020000  | 0.36310000  |
| C          | -1.86820000 | -0.49090000 | 0.88180000  |
| C          | -0.83420000 | -1.28190000 | 0.05070000  |
| C          | -3.05540000 | 0.67180000  | -0.83370000 |
| C          | -4.00230000 | -0.45520000 | -0.36710000 |
| C          | -3.26730000 | -1.13340000 | 0.81520000  |
| C          | 1.33490000  | -0.59870000 | 1.27360000  |
| O          | 1.98900000  | 0.67360000  | 1.35070000  |
| C          | 1.25060000  | 1.62830000  | 0.56270000  |
| O          | 1.33790000  | -1.23780000 | -1.03030000 |
| C          | 2.60240000  | -1.59030000 | -0.44860000 |
| C          | 2.37170000  | -1.67220000 | 1.04920000  |
| C          | -0.02720000 | 2.17470000  | 1.24970000  |
| C          | 3.70190000  | -0.57550000 | -0.78240000 |
| O          | 3.56310000  | 0.52910000  | -1.28840000 |

|   |             |             |             |
|---|-------------|-------------|-------------|
| O | 4.93320000  | -1.01790000 | -0.44690000 |
| H | 0.75380000  | -0.73810000 | 2.18870000  |
| O | 2.12500000  | 2.61590000  | 0.00310000  |
| C | -1.15410000 | 2.93660000  | -0.87950000 |
| H | -2.70590000 | 1.48700000  | 1.11840000  |
| H | -1.54320000 | -0.47170000 | 1.92900000  |
| C | -4.27280000 | -1.44710000 | -1.50450000 |
| C | -5.34270000 | 0.12840000  | 0.10780000  |
| O | -0.65600000 | -2.56900000 | 0.65770000  |
| H | 0.60370000  | 1.05210000  | -1.50760000 |
| H | -1.19560000 | -1.45860000 | -0.96890000 |
| H | -3.60320000 | 1.57570000  | -1.12330000 |
| H | -2.47180000 | 0.36260000  | -1.70980000 |
| H | -3.78850000 | -0.92370000 | 1.75850000  |
| H | -3.23250000 | -2.22330000 | 0.71990000  |
| H | 2.90680000  | -2.55330000 | -0.87200000 |
| H | 3.28240000  | -1.52180000 | 1.63660000  |
| H | 1.94950000  | -2.65180000 | 1.29890000  |
| H | -0.01760000 | 3.25200000  | 1.44960000  |
| H | -0.27460000 | 1.67410000  | 2.19330000  |
| H | 5.52890000  | -0.27840000 | -0.69120000 |
| H | 2.77960000  | 2.07270000  | -0.48190000 |
| H | -1.49240000 | 2.62410000  | -1.87270000 |
| H | -1.92690000 | 3.57510000  | -0.43760000 |
| H | -0.26190000 | 3.55460000  | -1.02970000 |
| H | -4.93910000 | -2.25200000 | -1.17470000 |
| H | -4.74570000 | -0.94770000 | -2.35750000 |
| H | -3.34800000 | -1.91110000 | -1.86260000 |
| H | -5.86840000 | 0.62840000  | -0.71350000 |
| H | -5.99920000 | -0.65860000 | 0.49560000  |
| H | -5.19810000 | 0.86570000  | 0.90530000  |
| H | -1.27440000 | -3.18160000 | 0.22160000  |

| <b>1-3</b> |             |             |             |
|------------|-------------|-------------|-------------|
| Atom       | X           | Y           | Z           |
| C          | -0.55660000 | -0.52460000 | -0.00070000 |
| C          | -0.35710000 | 0.91750000  | 0.47040000  |
| C          | 0.88700000  | 1.73620000  | 0.01230000  |
| C          | 2.13500000  | 0.92330000  | -0.35760000 |
| C          | 1.83820000  | -0.48730000 | -0.89050000 |
| C          | 0.78970000  | -1.25530000 | -0.05890000 |
| C          | 3.06710000  | 0.63390000  | 0.82520000  |
| C          | 3.98500000  | -0.50780000 | 0.33830000  |

|   |             |             |             |
|---|-------------|-------------|-------------|
| C | 3.21820000  | -1.17010000 | -0.83230000 |
| C | -1.33500000 | -0.47980000 | -1.32200000 |
| O | -2.00390000 | 0.78740000  | -1.31600000 |
| C | -1.23420000 | 1.70920000  | -0.52410000 |
| O | -1.41290000 | -1.21220000 | 0.95680000  |
| C | -2.62160000 | -1.63930000 | 0.28340000  |
| C | -2.35620000 | -1.58030000 | -1.20640000 |
| C | 0.05580000  | 2.23780000  | -1.20160000 |
| C | -3.79410000 | -0.75130000 | 0.71320000  |
| O | -4.88710000 | -0.71490000 | 0.17070000  |
| O | -3.49280000 | -0.01210000 | 1.81120000  |
| H | -0.73110000 | -0.54320000 | -2.23050000 |
| O | -2.08160000 | 2.70330000  | 0.05530000  |
| C | 1.20490000  | 2.92000000  | 0.94180000  |
| H | 2.70890000  | 1.47910000  | -1.11270000 |
| H | 1.51270000  | -0.45260000 | -1.93660000 |
| C | 4.25730000  | -1.50790000 | 1.46800000  |
| C | 5.32690000  | 0.05400000  | -0.15830000 |
| O | 0.60500000  | -2.55370000 | -0.62980000 |
| H | -0.59990000 | 1.05910000  | 1.53050000  |
| H | 1.15620000  | -1.41770000 | 0.96120000  |
| H | 3.63680000  | 1.52360000  | 1.11640000  |
| H | 2.48820000  | 0.32870000  | 1.70590000  |
| H | 3.73690000  | -0.98500000 | -1.78200000 |
| H | 3.14660000  | -2.25790000 | -0.72700000 |
| H | -2.85330000 | -2.65550000 | 0.61870000  |
| H | -3.25750000 | -1.39830000 | -1.79910000 |
| H | -1.91370000 | -2.52820000 | -1.53190000 |
| H | 0.07390000  | 3.31960000  | -1.37510000 |
| H | 0.28910000  | 1.75550000  | -2.15810000 |
| H | -2.56690000 | -0.20600000 | 2.08030000  |
| H | -2.97370000 | 2.37050000  | -0.15310000 |
| H | 1.53810000  | 2.57590000  | 1.92620000  |
| H | 1.99120000  | 3.55070000  | 0.51280000  |
| H | 0.32790000  | 3.55490000  | 1.10960000  |
| H | 4.90310000  | -2.32380000 | 1.12460000  |
| H | 4.75370000  | -1.01980000 | 2.31420000  |
| H | 3.33000000  | -1.95580000 | 1.84040000  |
| H | 5.87490000  | 0.54330000  | 0.65470000  |
| H | 5.96330000  | -0.74330000 | -0.55840000 |
| H | 5.18140000  | 0.79500000  | -0.95220000 |
| H | 0.14080000  | -3.08790000 | 0.04110000  |

| <b>2-1</b> |             |             |             |
|------------|-------------|-------------|-------------|
| Atom       | X           | Y           | Z           |
| C          | 0.28780000  | -0.57280000 | -0.01050000 |
| C          | 0.12620000  | 0.88350000  | -0.44280000 |
| C          | -1.11180000 | 1.71590000  | 0.00960000  |
| C          | -2.37920000 | 0.92170000  | 0.35280000  |
| C          | -2.11350000 | -0.50410000 | 0.86080000  |
| C          | -1.07450000 | -1.27290000 | 0.01940000  |
| C          | -3.30740000 | 0.67370000  | -0.84220000 |
| C          | -4.25050000 | -0.45960000 | -0.38420000 |
| C          | -3.50580000 | -1.15860000 | 0.77960000  |
| C          | 1.06150000  | -0.59070000 | 1.31460000  |
| O          | 1.71350000  | 0.68140000  | 1.40210000  |
| C          | 0.99680000  | 1.63320000  | 0.59040000  |
| O          | 1.12400000  | -1.26470000 | -0.97730000 |
| C          | 2.38820000  | -1.57380000 | -0.36670000 |
| C          | 2.11180000  | -1.65820000 | 1.12390000  |
| C          | -0.29460000 | 2.18360000  | 1.24550000  |
| C          | 3.48180000  | -0.53780000 | -0.67870000 |
| O          | 3.29820000  | 0.54360000  | -1.22720000 |
| O          | 4.69390000  | -0.99880000 | -0.25150000 |
| H          | 0.45750000  | -0.72940000 | 2.21450000  |
| O          | 1.88430000  | 2.61900000  | 0.04890000  |
| C          | -1.39370000 | 2.91930000  | -0.90570000 |
| H          | -2.94870000 | 1.47400000  | 1.11390000  |
| H          | -1.79310000 | -0.49630000 | 1.90910000  |
| C          | -4.53240000 | -1.43280000 | -1.53490000 |
| C          | -5.58560000 | 0.11790000  | 0.11260000  |
| O          | -0.92000000 | -2.59170000 | 0.55520000  |
| H          | 0.39600000  | 1.04800000  | -1.49330000 |
| C          | 5.77100000  | -0.08640000 | -0.46970000 |
| H          | -1.43580000 | -1.40240000 | -1.00730000 |
| H          | -3.85770000 | 1.57990000  | -1.11970000 |
| H          | -2.72810000 | 0.37490000  | -1.72480000 |
| H          | -4.02810000 | -0.98090000 | 1.72870000  |
| H          | -3.45460000 | -2.24540000 | 0.65450000  |
| H          | 2.72410000  | -2.53290000 | -0.77530000 |
| H          | 3.00230000  | -1.50150000 | 1.73990000  |
| H          | 1.68670000  | -2.63980000 | 1.36080000  |
| H          | -0.29150000 | 3.26330000  | 1.43270000  |
| H          | -0.55750000 | 1.69400000  | 2.19070000  |
| H          | 2.54210000  | 2.07770000  | -0.43460000 |
| H          | -1.71980000 | 2.59650000  | -1.89970000 |
| H          | -2.17350000 | 3.55890000  | -0.47800000 |

|   |             |             |             |
|---|-------------|-------------|-------------|
| H | -0.50180000 | 3.53890000  | -1.05150000 |
| H | -5.19620000 | -2.24260000 | -1.21210000 |
| H | -5.01260000 | -0.91940000 | -2.37540000 |
| H | -3.61070000 | -1.89120000 | -1.90850000 |
| H | -6.11770000 | 0.63280000  | -0.69520000 |
| H | -6.24010000 | -0.67470000 | 0.49250000  |
| H | -5.43260000 | 0.84090000  | 0.92160000  |
| H | -0.40130000 | -3.08780000 | -0.10610000 |
| H | 6.68490000  | -0.54140000 | -0.07810000 |
| H | 5.90590000  | 0.09710000  | -1.54010000 |
| H | 5.59380000  | 0.85140000  | 0.06630000  |

| 2-2  |             |             |             |
|------|-------------|-------------|-------------|
| Atom | X           | Y           | Z           |
| C    | 0.28570000  | -0.56830000 | 0.00250000  |
| C    | 0.11770000  | 0.88900000  | -0.42450000 |
| C    | -1.11590000 | 1.72290000  | 0.02600000  |
| C    | -2.38460000 | 0.92420000  | 0.34340000  |
| C    | -2.12400000 | -0.49540000 | 0.86800000  |
| C    | -1.07150000 | -1.28260000 | 0.05690000  |
| C    | -3.28320000 | 0.66150000  | -0.87060000 |
| C    | -4.23430000 | -0.46900000 | -0.42120000 |
| C    | -3.51930000 | -1.14330000 | 0.77560000  |
| C    | 1.07210000  | -0.59110000 | 1.31900000  |
| O    | 1.71760000  | 0.68430000  | 1.41080000  |
| C    | 0.99150000  | 1.63610000  | 0.60770000  |
| O    | 1.11940000  | -1.23220000 | -0.98370000 |
| C    | 2.37960000  | -1.56790000 | -0.38170000 |
| C    | 2.12010000  | -1.65700000 | 1.11160000  |
| C    | -0.30180000 | 2.17730000  | 1.26960000  |
| C    | 3.48030000  | -0.54010000 | -0.69410000 |
| O    | 3.30240000  | 0.55470000  | -1.21810000 |
| O    | 4.69420000  | -1.02360000 | -0.29650000 |
| H    | 0.47520000  | -0.73600000 | 2.22310000  |
| O    | 1.87240000  | 2.62790000  | 0.06600000  |
| C    | -1.39040000 | 2.93410000  | -0.88130000 |
| H    | -2.97410000 | 1.47920000  | 1.08730000  |
| H    | -1.81870000 | -0.47430000 | 1.92100000  |
| C    | -4.47890000 | -1.46290000 | -1.56260000 |
| C    | -5.58590000 | 0.10950000  | 0.02750000  |
| O    | -0.89890000 | -2.56890000 | 0.66790000  |
| H    | 0.38670000  | 1.05700000  | -1.47500000 |
| C    | 5.77840000  | -0.12100000 | -0.51830000 |

|   |             |             |             |
|---|-------------|-------------|-------------|
| H | -1.41310000 | -1.46170000 | -0.96910000 |
| H | -3.82900000 | 1.56300000  | -1.17110000 |
| H | -2.68180000 | 0.35400000  | -1.73520000 |
| H | -4.05900000 | -0.93440000 | 1.70870000  |
| H | -3.47880000 | -2.23300000 | 0.68220000  |
| H | 2.70070000  | -2.52740000 | -0.80100000 |
| H | 3.01730000  | -1.50270000 | 1.71830000  |
| H | 1.69930000  | -2.64020000 | 1.34920000  |
| H | -0.30060000 | 3.25470000  | 1.46930000  |
| H | -0.56530000 | 1.67580000  | 2.20830000  |
| H | 2.53440000  | 2.08830000  | -0.41410000 |
| H | -1.70850000 | 2.61990000  | -1.88060000 |
| H | -2.17400000 | 3.56960000  | -0.45440000 |
| H | -0.49800000 | 3.55560000  | -1.01470000 |
| H | -5.14820000 | -2.27030000 | -1.24500000 |
| H | -4.93740000 | -0.96610000 | -2.42500000 |
| H | -3.54560000 | -1.92350000 | -1.90260000 |
| H | -6.09780000 | 0.60660000  | -0.80420000 |
| H | -6.24640000 | -0.67990000 | 0.40340000  |
| H | -5.45960000 | 0.84800000  | 0.82700000  |
| H | -1.51270000 | -3.18220000 | 0.22640000  |
| H | 6.69370000  | -0.59470000 | -0.15290000 |
| H | 5.89560000  | 0.08090000  | -1.58750000 |
| H | 5.62370000  | 0.80870000  | 0.03840000  |

| <b>3-1</b> |             |             |             |
|------------|-------------|-------------|-------------|
| Atom       | X           | Y           | Z           |
| C          | -0.99810000 | -0.42300000 | 0.15770000  |
| C          | -0.70590000 | 0.98330000  | 0.67930000  |
| C          | 0.52890000  | 1.77560000  | 0.15660000  |
| C          | 1.70900000  | 0.93330000  | -0.34580000 |
| C          | 1.31240000  | -0.43410000 | -0.92370000 |
| C          | 0.29840000  | -1.20780000 | -0.05430000 |
| C          | 2.71210000  | 0.54490000  | 0.74680000  |
| C          | 3.54250000  | -0.60290000 | 0.13320000  |
| C          | 2.66230000  | -1.17250000 | -1.00640000 |
| C          | -1.88900000 | -0.29530000 | -1.07450000 |
| O          | -2.49750000 | 1.00070000  | -0.97300000 |
| C          | -1.62830000 | 1.85070000  | -0.20230000 |
| O          | -1.80400000 | -1.11450000 | 1.12830000  |
| C          | -2.88470000 | -1.68670000 | 0.52790000  |
| C          | -2.93510000 | -1.36690000 | -0.93060000 |
| C          | -0.37610000 | 2.36020000  | -0.96440000 |



|   |             |             |             |
|---|-------------|-------------|-------------|
| O | -3.67500000 | -2.40920000 | 1.11450000  |
| H | -1.36980000 | -0.33760000 | -2.03580000 |
| O | -2.38420000 | 2.85640000  | 0.47600000  |
| C | 0.96810000  | 2.90330000  | 1.10570000  |
| H | 2.24930000  | 1.50440000  | -1.11430000 |
| H | 0.91030000  | -0.33060000 | -1.93830000 |
| C | 3.85800000  | -1.67120000 | 1.18650000  |
| C | 4.86500000  | -0.06610000 | -0.43750000 |
| O | 0.00100000  | -2.45170000 | -0.69760000 |
| H | -0.85980000 | 1.08130000  | 1.76090000  |
| H | 0.73840000  | -1.45510000 | 0.91880000  |
| H | 3.33900000  | 1.39480000  | 1.03950000  |
| H | 2.18680000  | 0.21470000  | 1.65170000  |
| H | 3.11570000  | -0.95830000 | -1.98300000 |
| H | 2.55170000  | -2.26060000 | -0.94940000 |
| H | -2.66320000 | -2.26920000 | -1.48540000 |
| H | -3.93410000 | -1.02060000 | -1.20680000 |
| H | -0.32760000 | 3.44700000  | -1.09520000 |
| H | -0.24120000 | 1.91120000  | -1.95540000 |
| H | -3.17120000 | 2.94320000  | -0.08920000 |
| H | 1.36450000  | 2.50270000  | 2.04440000  |
| H | 1.74310000  | 3.52260000  | 0.64090000  |
| H | 0.13420000  | 3.56260000  | 1.37090000  |
| H | 4.44120000  | -2.49140000 | 0.75310000  |
| H | 4.43730000  | -1.24790000 | 2.01470000  |
| H | 2.94400000  | -2.10320000 | 1.60730000  |
| H | 5.49270000  | 0.35840000  | 0.35400000  |
| H | 5.43580000  | -0.86430000 | -0.92520000 |
| H | 4.69080000  | 0.72100000  | -1.17950000 |
| H | -0.26130000 | -3.08010000 | 0.00240000  |

| 3-2  |             |             |             |
|------|-------------|-------------|-------------|
| Atom | X           | Y           | Z           |
| C    | -0.99390000 | -0.42570000 | 0.15260000  |
| C    | -0.70310000 | 0.98200000  | 0.67070000  |
| C    | 0.52330000  | 1.78060000  | 0.14430000  |
| C    | 1.70880000  | 0.93990000  | -0.34310000 |
| C    | 1.32090000  | -0.42340000 | -0.93530000 |
| C    | 0.29930000  | -1.21220000 | -0.08720000 |
| C    | 2.69420000  | 0.54390000  | 0.76260000  |
| C    | 3.53510000  | -0.59830000 | 0.15240000  |
| C    | 2.67880000  | -1.14770000 | -1.01500000 |
| C    | -1.90330000 | -0.30610000 | -1.06620000 |

|   |             |             |             |
|---|-------------|-------------|-------------|
| O | -2.51250000 | 0.98970000  | -0.96300000 |
| C | -1.63460000 | 1.84400000  | -0.20670000 |
| O | -1.78530000 | -1.11030000 | 1.14020000  |
| C | -2.86410000 | -1.70160000 | 0.55600000  |
| C | -2.94020000 | -1.38480000 | -0.90260000 |
| C | -0.38720000 | 2.34900000  | -0.98120000 |
| O | -3.65150000 | -2.41470000 | 1.15900000  |
| H | -1.39620000 | -0.35010000 | -2.03410000 |
| O | -2.38410000 | 2.85450000  | 0.47170000  |
| C | 0.95480000  | 2.91810000  | 1.08540000  |
| H | 2.26110000  | 1.51510000  | -1.10000000 |
| H | 0.92670000  | -0.31030000 | -1.95230000 |
| C | 3.82340000  | -1.68240000 | 1.19740000  |
| C | 4.87220000  | -0.05860000 | -0.38030000 |
| O | -0.02580000 | -2.42510000 | -0.77760000 |
| H | -0.85260000 | 1.08100000  | 1.75290000  |
| H | 0.72160000  | -1.49990000 | 0.88230000  |
| H | 3.31570000  | 1.39180000  | 1.07220000  |
| H | 2.15400000  | 0.20590000  | 1.65590000  |
| H | 3.14500000  | -0.90150000 | -1.97820000 |
| H | 2.58380000  | -2.23770000 | -0.99040000 |
| H | -2.67460000 | -2.28660000 | -1.46090000 |
| H | -3.94530000 | -1.04330000 | -1.16200000 |
| H | -0.34250000 | 3.43440000  | -1.12460000 |
| H | -0.25460000 | 1.88880000  | -1.96730000 |
| H | -3.21900000 | 2.86290000  | -0.02770000 |
| H | 1.35130000  | 2.52700000  | 2.02800000  |
| H | 1.72790000  | 3.53720000  | 0.61730000  |
| H | 0.11750000  | 3.57580000  | 1.34360000  |
| H | 4.41410000  | -2.49820000 | 0.76570000  |
| H | 4.38500000  | -1.27270000 | 2.04440000  |
| H | 2.89930000  | -2.11780000 | 1.59160000  |
| H | 5.48380000  | 0.35110000  | 0.43140000  |
| H | 5.45040000  | -0.85170000 | -0.86770000 |
| H | 4.71750000  | 0.74070000  | -1.11370000 |
| H | 0.62610000  | -3.09940000 | -0.51240000 |

| <b>4a-1</b> |            |             |             |
|-------------|------------|-------------|-------------|
| Atom        | X          | Y           | Z           |
| C           | 3.13960000 | 0.29070000  | 0.78330000  |
| C           | 3.38290000 | 0.19980000  | -0.59210000 |
| C           | 2.72720000 | -0.73030000 | -1.37720000 |
| C           | 1.77940000 | -1.56080000 | -0.77020000 |

|   |             |             |             |
|---|-------------|-------------|-------------|
| C | 1.51280000  | -1.46690000 | 0.61670000  |
| C | 2.23230000  | -0.55570000 | 1.42270000  |
| C | 4.01120000  | 1.35480000  | 1.39270000  |
| C | 4.47510000  | 2.16880000  | 0.15420000  |
| C | 4.43540000  | 1.17130000  | -1.03220000 |
| C | 1.08010000  | -2.56920000 | -1.61410000 |
| O | 0.00480000  | -3.18890000 | -1.06940000 |
| C | -0.60480000 | -2.63690000 | 0.10950000  |
| C | 0.45880000  | -2.38760000 | 1.18040000  |
| O | -1.32410000 | -1.43930000 | -0.22650000 |
| C | -2.26880000 | -1.06030000 | 0.65770000  |
| C | -3.00100000 | 0.14980000  | 0.20430000  |
| O | -2.57480000 | -1.66060000 | 1.67920000  |
| C | -4.36190000 | 0.24580000  | 0.56010000  |
| C | -5.14570000 | 1.31760000  | 0.13760000  |
| C | -4.56490000 | 2.31680000  | -0.62820000 |
| C | -3.21530000 | 2.26590000  | -0.96240000 |
| C | -2.40640000 | 1.19470000  | -0.53890000 |
| C | -0.94810000 | 1.23010000  | -0.90570000 |
| O | -5.28680000 | 3.38560000  | -1.06910000 |
| O | -5.00980000 | -0.68610000 | 1.33280000  |
| O | 1.47970000  | -2.84380000 | -2.73800000 |
| C | 1.99980000  | -0.45440000 | 2.90370000  |
| C | 5.88960000  | 2.72010000  | 0.35980000  |
| C | 3.51230000  | 3.34550000  | -0.10360000 |
| H | 2.94170000  | -0.81050000 | -2.43970000 |
| H | 3.45990000  | 1.97780000  | 2.10420000  |
| H | 4.85390000  | 0.87560000  | 1.90380000  |
| H | 4.17090000  | 1.65810000  | -1.97630000 |
| H | 5.38600000  | 0.63930000  | -1.15150000 |
| H | -1.31070000 | -3.39870000 | 0.46170000  |
| H | 0.94490000  | -3.32860000 | 1.46260000  |
| H | -0.00540000 | -1.94770000 | 2.06720000  |
| H | -6.19330000 | 1.35400000  | 0.41840000  |
| H | -2.79370000 | 3.07720000  | -1.55340000 |
| H | -0.64190000 | 2.23300000  | -1.22400000 |
| H | -0.32720000 | 0.97890000  | -0.04080000 |
| H | -0.74310000 | 0.54320000  | -1.73210000 |
| H | -6.20860000 | 3.28050000  | -0.77890000 |
| H | -4.34390000 | -1.27960000 | 1.74230000  |
| H | 2.83090000  | 0.04100000  | 3.41480000  |
| H | 1.08490000  | 0.11280000  | 3.10110000  |
| H | 1.91450000  | -1.44930000 | 3.35260000  |
| H | 6.23020000  | 3.26970000  | -0.52470000 |

|   |            |            |             |
|---|------------|------------|-------------|
| H | 5.92560000 | 3.40190000 | 1.21660000  |
| H | 6.60780000 | 1.91400000 | 0.54660000  |
| H | 3.50890000 | 4.04170000 | 0.74270000  |
| H | 3.81060000 | 3.90770000 | -0.99560000 |
| H | 2.48230000 | 3.00430000 | -0.25590000 |

| <b>4a-2</b> |             |             |             |
|-------------|-------------|-------------|-------------|
| Atom        | X           | Y           | Z           |
| C           | 3.06990000  | 0.47760000  | 0.71830000  |
| C           | 3.29420000  | 0.36860000  | -0.65920000 |
| C           | 2.63010000  | -0.57250000 | -1.42450000 |
| C           | 1.71200000  | -1.41610000 | -0.79110000 |
| C           | 1.45770000  | -1.30050000 | 0.59600000  |
| C           | 2.15750000  | -0.35020000 | 1.37610000  |
| C           | 3.89810000  | 1.59740000  | 1.28760000  |
| C           | 4.94630000  | 1.85720000  | 0.17110000  |
| C           | 4.27340000  | 1.39340000  | -1.14560000 |
| C           | 1.02590000  | -2.45400000 | -1.60980000 |
| O           | -0.02110000 | -3.09750000 | -1.03850000 |
| C           | -0.63150000 | -2.54430000 | 0.13930000  |
| C           | 0.43730000  | -2.24010000 | 1.19030000  |
| O           | -1.39630000 | -1.37870000 | -0.20800000 |
| C           | -2.34070000 | -1.01520000 | 0.68290000  |
| C           | -3.12600000 | 0.15640000  | 0.21610000  |
| O           | -2.60660000 | -1.60330000 | 1.72270000  |
| C           | -4.47930000 | 0.21710000  | 0.60730000  |
| C           | -5.31070000 | 1.24960000  | 0.17770000  |
| C           | -4.78600000 | 2.24510000  | -0.63200000 |
| C           | -3.44530000 | 2.22930000  | -1.00340000 |
| C           | -2.58870000 | 1.19830000  | -0.57350000 |
| C           | -1.14360000 | 1.27170000  | -0.98480000 |
| O           | -5.55590000 | 3.27610000  | -1.08180000 |
| O           | -5.07440000 | -0.71320000 | 1.42310000  |
| O           | 1.41330000  | -2.73180000 | -2.73720000 |
| C           | 1.89700000  | -0.20400000 | 2.84900000  |
| C           | 6.22380000  | 1.03540000  | 0.43590000  |
| C           | 5.31680000  | 3.34230000  | 0.10360000  |
| H           | 2.81960000  | -0.65410000 | -2.49170000 |
| H           | 3.25310000  | 2.46800000  | 1.45230000  |
| H           | 4.37980000  | 1.31800000  | 2.22950000  |
| H           | 3.72510000  | 2.20720000  | -1.63350000 |
| H           | 4.99180000  | 0.96610000  | -1.85250000 |
| H           | -1.30630000 | -3.32260000 | 0.51540000  |

|   |             |             |             |
|---|-------------|-------------|-------------|
| H | 0.95560000  | -3.16050000 | 1.48360000  |
| H | -0.02880000 | -1.80010000 | 2.07560000  |
| H | -6.35090000 | 1.25910000  | 0.48700000  |
| H | -3.06840000 | 3.03650000  | -1.62920000 |
| H | -0.88210000 | 2.27400000  | -1.34230000 |
| H | -0.48920000 | 1.06870000  | -0.13200000 |
| H | -0.93890000 | 0.56700000  | -1.79620000 |
| H | -6.46510000 | 3.14880000  | -0.76230000 |
| H | -4.37850000 | -1.27580000 | 1.82630000  |
| H | 2.63500000  | 0.43300000  | 3.34360000  |
| H | 0.91010000  | 0.24100000  | 3.01140000  |
| H | 1.94290000  | -1.17950000 | 3.34430000  |
| H | 6.95880000  | 1.18480000  | -0.36300000 |
| H | 6.69360000  | 1.33390000  | 1.37990000  |
| H | 6.01250000  | -0.03790000 | 0.49570000  |
| H | 5.76660000  | 3.67890000  | 1.04420000  |
| H | 6.03460000  | 3.53280000  | -0.70190000 |
| H | 4.43460000  | 3.96450000  | -0.08390000 |

| <b>4a-3</b> |             |             |             |
|-------------|-------------|-------------|-------------|
| Atom        | X           | Y           | Z           |
| C           | 3.05130000  | 0.50660000  | 0.71040000  |
| C           | 3.31680000  | 0.21040000  | -0.63120000 |
| C           | 2.70500000  | -0.85500000 | -1.26580000 |
| C           | 1.78170000  | -1.61810000 | -0.54300000 |
| C           | 1.49340000  | -1.31880000 | 0.81000000  |
| C           | 2.16570000  | -0.26280000 | 1.46710000  |
| C           | 3.87720000  | 1.68350000  | 1.15330000  |
| C           | 4.33670000  | 2.30780000  | -0.19240000 |
| C           | 4.34190000  | 1.13770000  | -1.20970000 |
| C           | 1.14260000  | -2.78050000 | -1.22140000 |
| O           | 0.11330000  | -3.38170000 | -0.57590000 |
| C           | -0.54650000 | -2.68300000 | 0.49190000  |
| C           | 0.47990000  | -2.18880000 | 1.51150000  |
| O           | -1.33050000 | -1.60690000 | -0.04490000 |
| C           | -2.33730000 | -1.16860000 | 0.73580000  |
| C           | -3.03900000 | -0.00300000 | 0.13540000  |
| O           | -2.60880000 | -1.58900000 | 1.85270000  |
| C           | -3.61510000 | 0.92570000  | 1.02750000  |
| C           | -4.24600000 | 2.07910000  | 0.56530000  |
| C           | -4.32230000 | 2.30450000  | -0.80030000 |
| C           | -3.79070000 | 1.39040000  | -1.70420000 |
| C           | -3.15670000 | 0.21560000  | -1.25650000 |

|   |             |             |             |
|---|-------------|-------------|-------------|
| C | -2.63410000 | -0.73530000 | -2.29940000 |
| O | -4.92550000 | 3.41760000  | -1.30530000 |
| O | -3.59920000 | 0.77530000  | 2.39250000  |
| O | 1.55210000  | -3.19380000 | -2.29840000 |
| C | 1.90860000  | 0.06060000  | 2.91190000  |
| C | 5.73250000  | 2.92550000  | -0.06080000 |
| C | 3.34650000  | 3.40180000  | -0.64010000 |
| H | 2.93770000  | -1.09200000 | -2.30070000 |
| H | 3.29370000  | 2.39130000  | 1.75060000  |
| H | 4.72590000  | 1.32060000  | 1.74420000  |
| H | 4.07240000  | 1.46310000  | -2.21960000 |
| H | 5.31050000  | 0.62600000  | -1.23960000 |
| H | -1.20940000 | -3.41880000 | 0.96300000  |
| H | 1.01200000  | -3.03690000 | 1.95770000  |
| H | -0.02660000 | -1.63000000 | 2.30330000  |
| H | -4.66840000 | 2.77770000  | 1.28020000  |
| H | -3.88080000 | 1.59810000  | -2.76910000 |
| H | -3.07840000 | -0.53150000 | -3.28020000 |
| H | -1.54900000 | -0.63460000 | -2.39930000 |
| H | -2.89610000 | -1.76890000 | -2.05190000 |
| H | -5.24950000 | 3.95960000  | -0.56640000 |
| H | -3.32150000 | -0.14170000 | 2.60720000  |
| H | 2.70910000  | 0.66890000  | 3.34370000  |
| H | 0.96650000  | 0.60860000  | 3.01110000  |
| H | 1.86180000  | -0.85380000 | 3.51230000  |
| H | 6.07090000  | 3.34090000  | -1.01650000 |
| H | 5.73730000  | 3.73300000  | 0.67970000  |
| H | 6.46970000  | 2.17970000  | 0.25660000  |
| H | 3.31180000  | 4.22060000  | 0.08740000  |
| H | 3.64250000  | 3.82700000  | -1.60570000 |
| H | 2.32870000  | 3.01100000  | -0.74780000 |

| <b>4a-4</b> |             |             |             |
|-------------|-------------|-------------|-------------|
| Atom        | X           | Y           | Z           |
| C           | -2.96510000 | -0.68720000 | 0.58350000  |
| C           | -3.21010000 | -0.31370000 | -0.74330000 |
| C           | -2.59320000 | 0.78850000  | -1.30640000 |
| C           | -1.70350000 | 1.52700000  | -0.51960000 |
| C           | -1.42900000 | 1.14710000  | 0.81560000  |
| C           | -2.07900000 | 0.02950000  | 1.39060000  |
| C           | -3.73960000 | -1.93280000 | 0.91890000  |
| C           | -4.78970000 | -2.00760000 | -0.22330000 |
| C           | -4.15180000 | -1.26110000 | -1.42220000 |

|   |             |             |             |
|---|-------------|-------------|-------------|
| C | -1.07610000 | 2.74040000  | -1.11470000 |
| O | -0.07150000 | 3.32190000  | -0.41470000 |
| C | 0.58400000  | 2.57400000  | 0.62180000  |
| C | -0.44930000 | 1.99560000  | 1.58860000  |
| O | 1.40340000  | 1.55070000  | 0.03680000  |
| C | 2.40510000  | 1.08850000  | 0.81020000  |
| C | 3.14780000  | -0.02000000 | 0.15360000  |
| O | 2.64360000  | 1.44400000  | 1.95680000  |
| C | 3.72620000  | -0.99070000 | 0.99800000  |
| C | 4.39490000  | -2.09730000 | 0.47810000  |
| C | 4.50700000  | -2.23240000 | -0.89690000 |
| C | 3.97360000  | -1.27430000 | -1.75290000 |
| C | 3.30170000  | -0.14540000 | -1.24620000 |
| C | 2.77960000  | 0.85880000  | -2.23810000 |
| O | 5.14800000  | -3.29660000 | -1.45750000 |
| O | 3.67630000  | -0.92870000 | 2.36900000  |
| O | -1.47430000 | 3.20940000  | -2.17300000 |
| C | -1.79470000 | -0.39830000 | 2.80310000  |
| C | -6.09640000 | -1.31040000 | 0.20570000  |
| C | -5.10010000 | -3.46340000 | -0.58640000 |
| H | -2.79810000 | 1.07320000  | -2.33520000 |
| H | -3.05750000 | -2.79050000 | 0.90300000  |
| H | -4.22100000 | -1.86880000 | 1.89950000  |
| H | -3.57630000 | -1.93660000 | -2.06530000 |
| H | -4.89540000 | -0.73200000 | -2.02670000 |
| H | 1.22020000  | 3.29430000  | 1.15000000  |
| H | -1.01060000 | 2.80310000  | 2.07300000  |
| H | 0.05520000  | 1.40470000  | 2.35760000  |
| H | 4.81810000  | -2.83080000 | 1.15680000  |
| H | 4.09250000  | -1.41070000 | -2.82650000 |
| H | 3.25100000  | 0.72950000  | -3.21890000 |
| H | 1.69980000  | 0.73980000  | -2.37040000 |
| H | 3.01030000  | 1.88000000  | -1.91820000 |
| H | 5.46890000  | -3.87750000 | -0.74730000 |
| H | 3.37370000  | -0.03330000 | 2.63500000  |
| H | -2.49480000 | -1.15830000 | 3.15960000  |
| H | -0.78550000 | -0.81720000 | 2.87080000  |
| H | -1.88210000 | 0.45360000  | 3.48550000  |
| H | -6.83420000 | -1.32760000 | -0.60450000 |
| H | -6.54230000 | -1.81180000 | 1.07210000  |
| H | -5.92830000 | -0.26290000 | 0.47900000  |
| H | -5.52460000 | -4.00040000 | 0.26910000  |
| H | -5.81910000 | -3.51860000 | -1.41120000 |
| H | -4.19560000 | -3.99750000 | -0.89800000 |

| <b>4a-5</b> |             |             |             |
|-------------|-------------|-------------|-------------|
| Atom        | X           | Y           | Z           |
| C           | 3.14300000  | 0.28430000  | 0.78180000  |
| C           | 3.38170000  | 0.20200000  | -0.59480000 |
| C           | 2.72090000  | -0.72100000 | -1.38410000 |
| C           | 1.77320000  | -1.55360000 | -0.77970000 |
| C           | 1.51150000  | -1.46850000 | 0.60860000  |
| C           | 2.23550000  | -0.56420000 | 1.41830000  |
| C           | 4.02040000  | 1.34080000  | 1.39610000  |
| C           | 4.48390000  | 2.16140000  | 0.16180000  |
| C           | 4.43680000  | 1.17240000  | -1.03130000 |
| C           | 1.06870000  | -2.55450000 | -1.62840000 |
| O           | -0.00200000 | -3.18070000 | -1.08220000 |
| C           | -0.60840000 | -2.63530000 | 0.10160000  |
| C           | 0.45890000  | -2.39210000 | 1.17030000  |
| O           | -1.32890000 | -1.43630000 | -0.22770000 |
| C           | -2.26430000 | -1.05510000 | 0.66560000  |
| C           | -3.00220000 | 0.15210000  | 0.21280000  |
| O           | -2.55650000 | -1.65110000 | 1.69340000  |
| C           | -4.35960000 | 0.24610000  | 0.57820000  |
| C           | -5.14430000 | 1.31430000  | 0.15240000  |
| C           | -4.57490000 | 2.31030000  | -0.62570000 |
| C           | -3.22680000 | 2.26330000  | -0.97090000 |
| C           | -2.41470000 | 1.19490000  | -0.54180000 |
| C           | -0.95700000 | 1.22780000  | -0.91440000 |
| O           | -5.37480000 | 3.33800000  | -1.02850000 |
| O           | -4.99880000 | -0.68330000 | 1.36000000  |
| O           | 1.46000000  | -2.81630000 | -2.75830000 |
| C           | 2.00840000  | -0.47320000 | 2.90090000  |
| C           | 5.90120000  | 2.70570000  | 0.36700000  |
| C           | 3.52510000  | 3.34380000  | -0.08500000 |
| H           | 2.93250000  | -0.79520000 | -2.44770000 |
| H           | 3.47350000  | 1.96100000  | 2.11340000  |
| H           | 4.86280000  | 0.85480000  | 1.90140000  |
| H           | 4.17140000  | 1.66670000  | -1.97130000 |
| H           | 5.38490000  | 0.63750000  | -1.15720000 |
| H           | -1.31410000 | -3.39830000 | 0.45170000  |
| H           | 0.94560000  | -3.33500000 | 1.44520000  |
| H           | -0.00150000 | -1.95750000 | 2.06160000  |
| H           | -6.19330000 | 1.36790000  | 0.42910000  |
| H           | -2.79310000 | 3.06140000  | -1.56890000 |
| H           | -0.65080000 | 2.23010000  | -1.23460000 |



|   |             |             |             |
|---|-------------|-------------|-------------|
| H | -0.33280000 | 0.97720000  | -0.05160000 |
| H | -0.75630000 | 0.54000000  | -1.74100000 |
| H | -4.85880000 | 3.94450000  | -1.58420000 |
| H | -4.32980000 | -1.26970000 | 1.77310000  |
| H | 1.92520000  | -1.47140000 | 3.34310000  |
| H | 2.84120000  | 0.01890000  | 3.41250000  |
| H | 1.09410000  | 0.09230000  | 3.10570000  |
| H | 6.24140000  | 3.26010000  | -0.51470000 |
| H | 5.94240000  | 3.38140000  | 1.22830000  |
| H | 6.61670000  | 1.89550000  | 0.54610000  |
| H | 3.52690000  | 4.03410000  | 0.76610000  |
| H | 3.82310000  | 3.91100000  | -0.97400000 |
| H | 2.49330000  | 3.00780000  | -0.23670000 |

| <b>4a-6</b> |             |             |             |
|-------------|-------------|-------------|-------------|
| Atom        | X           | Y           | Z           |
| C           | 3.04890000  | 0.49730000  | 0.70160000  |
| C           | 3.30850000  | 0.19870000  | -0.64060000 |
| C           | 2.69030000  | -0.86480000 | -1.27190000 |
| C           | 1.76670000  | -1.62390000 | -0.54510000 |
| C           | 1.48510000  | -1.32270000 | 0.80890000  |
| C           | 2.16340000  | -0.26830000 | 1.46230000  |
| C           | 3.88030000  | 1.67170000  | 1.14060000  |
| C           | 4.33770000  | 2.29280000  | -0.20730000 |
| C           | 4.33520000  | 1.12160000  | -1.22330000 |
| C           | 1.11920000  | -2.78320000 | -1.22110000 |
| O           | 0.09430000  | -3.38410000 | -0.56820000 |
| C           | -0.55950000 | -2.68270000 | 0.50160000  |
| C           | 0.47220000  | -2.18900000 | 1.51590000  |
| O           | -1.34320000 | -1.60600000 | -0.03450000 |
| C           | -2.34430000 | -1.16270000 | 0.75120000  |
| C           | -3.03790000 | 0.00600000  | 0.14930000  |
| O           | -2.61300000 | -1.57950000 | 1.86970000  |
| C           | -3.56800000 | 0.96180000  | 1.03880000  |
| C           | -4.18150000 | 2.11890000  | 0.56660000  |
| C           | -4.28940000 | 2.32340000  | -0.80010000 |
| C           | -3.80500000 | 1.38090000  | -1.70320000 |
| C           | -3.18790000 | 0.20000000  | -1.24440000 |
| C           | -2.71350000 | -0.78850000 | -2.27630000 |
| O           | -4.89210000 | 3.46950000  | -1.22600000 |
| O           | -3.51840000 | 0.83330000  | 2.40450000  |
| O           | 1.51710000  | -3.19340000 | -2.30360000 |
| C           | 1.91220000  | 0.05800000  | 2.90760000  |

|   |             |             |             |
|---|-------------|-------------|-------------|
| C | 5.73630000  | 2.90550000  | -0.08100000 |
| C | 3.35010000  | 3.38990000  | -0.65290000 |
| H | 2.91840000  | -1.10370000 | -2.30740000 |
| H | 3.30130000  | 2.38220000  | 1.73890000  |
| H | 4.72970000  | 1.30640000  | 1.72910000  |
| H | 4.06380000  | 1.44680000  | -2.23270000 |
| H | 5.30180000  | 0.60620000  | -1.25580000 |
| H | -1.22210000 | -3.41630000 | 0.97640000  |
| H | 1.00400000  | -3.03760000 | 1.96160000  |
| H | -0.02980000 | -1.62750000 | 2.30880000  |
| H | -4.57460000 | 2.85390000  | 1.26290000  |
| H | -3.90860000 | 1.55190000  | -2.77220000 |
| H | -3.18930000 | -0.60710000 | -3.24660000 |
| H | -1.63120000 | -0.70560000 | -2.41550000 |
| H | -2.97970000 | -1.81090000 | -1.98990000 |
| H | -4.89820000 | 3.48410000  | -2.19700000 |
| H | -3.27380000 | -0.09000000 | 2.62870000  |
| H | 1.86500000  | -0.85540000 | 3.50950000  |
| H | 2.71590000  | 0.66460000  | 3.33580000  |
| H | 0.97200000  | 0.60880000  | 3.00920000  |
| H | 6.07300000  | 3.31850000  | -1.03830000 |
| H | 5.74650000  | 3.71380000  | 0.65860000  |
| H | 6.47170000  | 2.15720000  | 0.23480000  |
| H | 3.32090000  | 4.20970000  | 0.07370000  |
| H | 3.64450000  | 3.81300000  | -1.62000000 |
| H | 2.33050000  | 3.00290000  | -0.75690000 |

| <b>4a-7</b> |             |             |             |
|-------------|-------------|-------------|-------------|
| Atom        | X           | Y           | Z           |
| C           | 3.07330000  | 0.47230000  | 0.71940000  |
| C           | 3.29330000  | 0.37390000  | -0.65960000 |
| C           | 2.62450000  | -0.55950000 | -1.43030000 |
| C           | 1.70670000  | -1.40650000 | -0.80100000 |
| C           | 1.45720000  | -1.30170000 | 0.58770000  |
| C           | 2.16100000  | -0.35870000 | 1.37320000  |
| C           | 3.90710000  | 1.58440000  | 1.29560000  |
| C           | 4.95300000  | 1.84980000  | 0.17820000  |
| C           | 4.27470000  | 1.39920000  | -1.14020000 |
| C           | 1.01590000  | -2.43630000 | -1.62620000 |
| O           | -0.02590000 | -3.08760000 | -1.05440000 |
| C           | -0.63360000 | -2.54280000 | 0.12880000  |
| C           | 0.43860000  | -2.24570000 | 1.17840000  |
| O           | -1.39990000 | -1.37570000 | -0.21050000 |

|   |             |             |             |
|---|-------------|-------------|-------------|
| C | -2.33540000 | -1.01110000 | 0.68960000  |
| C | -3.12690000 | 0.15750000  | 0.22480000  |
| O | -2.58750000 | -1.59570000 | 1.73450000  |
| C | -4.47650000 | 0.21550000  | 0.62530000  |
| C | -5.30930000 | 1.24430000  | 0.19350000  |
| C | -4.79670000 | 2.23690000  | -0.62700000 |
| C | -3.45780000 | 2.22580000  | -1.00930000 |
| C | -2.59740000 | 1.19790000  | -0.57480000 |
| C | -1.15310000 | 1.27000000  | -0.99160000 |
| O | -5.64250000 | 3.22510000  | -1.03430000 |
| O | -5.06230000 | -0.71310000 | 1.44890000  |
| O | 1.39490000  | -2.69970000 | -2.75990000 |
| C | 1.90590000  | -0.22480000 | 2.84830000  |
| C | 6.22840000  | 1.02150000  | 0.43260000  |
| C | 5.32830000  | 3.33420000  | 0.12190000  |
| H | 2.81130000  | -0.63350000 | -2.49860000 |
| H | 3.26560000  | 2.45580000  | 1.46960000  |
| H | 4.39060000  | 1.29530000  | 2.23370000  |
| H | 3.72790000  | 2.21890000  | -1.62000000 |
| H | 4.98960000  | 0.97520000  | -1.85260000 |
| H | -1.30780000 | -3.32330000 | 0.50160000  |
| H | 0.95800000  | -3.16810000 | 1.46320000  |
| H | -0.02390000 | -1.81230000 | 2.06880000  |
| H | -6.35150000 | 1.26980000  | 0.49830000  |
| H | -3.06900000 | 3.02090000  | -1.64110000 |
| H | -0.89220000 | 2.27210000  | -1.35000000 |
| H | -0.49540000 | 1.06720000  | -0.14120000 |
| H | -0.95210000 | 0.56510000  | -1.80370000 |
| H | -5.16350000 | 3.83320000  | -1.62070000 |
| H | -4.36320000 | -1.26850000 | 1.85490000  |
| H | 2.64360000  | 0.41070000  | 3.34500000  |
| H | 0.91830000  | 0.21610000  | 3.01810000  |
| H | 1.95660000  | -1.20410000 | 3.33560000  |
| H | 6.96170000  | 1.17500000  | -0.36720000 |
| H | 6.70190000  | 1.31060000  | 1.37760000  |
| H | 6.01360000  | -0.05150000 | 0.48410000  |
| H | 5.78200000  | 3.66150000  | 1.06400000  |
| H | 6.04450000  | 3.52890000  | -0.68410000 |
| H | 4.44770000  | 3.96090000  | -0.05790000 |

| <b>4a-8</b> |             |             |            |
|-------------|-------------|-------------|------------|
| Atom        | X           | Y           | Z          |
| C           | -2.96230000 | -0.67990000 | 0.57580000 |

|   |             |             |             |
|---|-------------|-------------|-------------|
| C | -3.20190000 | -0.30410000 | -0.75130000 |
| C | -2.57950000 | 0.79670000  | -1.31120000 |
| C | -1.69000000 | 1.53160000  | -0.52060000 |
| C | -1.42180000 | 1.14970000  | 0.81520000  |
| C | -2.07670000 | 0.03320000  | 1.38660000  |
| C | -3.74150000 | -1.92360000 | 0.90750000  |
| C | -4.78840000 | -1.99370000 | -0.23800000 |
| C | -4.14470000 | -1.24780000 | -1.43410000 |
| C | -1.05530000 | 2.74240000  | -1.11330000 |
| O | -0.05560000 | 3.32390000  | -0.40620000 |
| C | 0.59470000  | 2.57350000  | 0.63200000  |
| C | -0.44330000 | 1.99490000  | 1.59350000  |
| O | 1.41460000  | 1.55030000  | 0.04750000  |
| C | 2.41090000  | 1.08320000  | 0.82550000  |
| C | 3.14640000  | -0.02770000 | 0.16690000  |
| O | 2.64640000  | 1.43490000  | 1.97340000  |
| C | 3.67990000  | -1.02640000 | 1.00570000  |
| C | 4.33230000  | -2.13580000 | 0.47510000  |
| C | 4.47610000  | -2.24880000 | -0.89890000 |
| C | 3.98890000  | -1.26120000 | -1.75110000 |
| C | 3.33250000  | -0.12730000 | -1.23230000 |
| C | 2.85700000  | 0.91480000  | -2.20940000 |
| O | 5.11650000  | -3.35050000 | -1.38290000 |
| O | 3.59640000  | -0.98750000 | 2.37530000  |
| O | -1.44220000 | 3.20870000  | -2.17700000 |
| C | -1.79770000 | -0.39770000 | 2.79930000  |
| C | -6.09420000 | -1.29300000 | 0.18800000  |
| C | -5.10230000 | -3.44810000 | -0.60380000 |
| H | -2.78030000 | 1.08310000  | -2.34020000 |
| H | -3.06200000 | -2.78330000 | 0.89250000  |
| H | -4.22560000 | -1.85930000 | 1.88660000  |
| H | -3.56940000 | -1.92420000 | -2.07630000 |
| H | -4.88480000 | -0.71550000 | -2.04010000 |
| H | 1.23010000  | 3.29180000  | 1.16380000  |
| H | -1.00490000 | 2.80250000  | 2.07740000  |
| H | 0.05730000  | 1.40170000  | 2.36330000  |
| H | 4.72780000  | -2.90510000 | 1.13200000  |
| H | 4.12090000  | -1.36020000 | -2.82600000 |
| H | 3.35940000  | 0.80850000  | -3.17750000 |
| H | 1.78070000  | 0.81550000  | -2.38020000 |
| H | 3.09050000  | 1.92240000  | -1.85100000 |
| H | 5.14550000  | -3.30170000 | -2.35250000 |
| H | 3.32610000  | -0.08600000 | 2.65220000  |
| H | -1.88590000 | 0.45310000  | 3.48300000  |

|   |             |             |             |
|---|-------------|-------------|-------------|
| H | -2.50020000 | -1.15720000 | 3.15220000  |
| H | -0.78950000 | -0.81850000 | 2.86960000  |
| H | -6.82960000 | -1.30690000 | -0.62440000 |
| H | -6.54430000 | -1.79400000 | 1.05250000  |
| H | -5.92370000 | -0.24640000 | 0.46310000  |
| H | -5.53090000 | -3.98490000 | 0.24970000  |
| H | -5.81900000 | -3.50010000 | -1.43080000 |
| H | -4.19850000 | -3.98460000 | -0.91340000 |

| <b>4a-9</b> |             |             |             |
|-------------|-------------|-------------|-------------|
| Atom        | X           | Y           | Z           |
| C           | -4.04090000 | -0.72790000 | -0.44290000 |
| C           | -4.48730000 | 0.54250000  | -0.06190000 |
| C           | -3.60640000 | 1.59790000  | 0.08770000  |
| C           | -2.24340000 | 1.36040000  | -0.11980000 |
| C           | -1.77810000 | 0.07600000  | -0.48970000 |
| C           | -2.69160000 | -0.98280000 | -0.69530000 |
| C           | -5.20760000 | -1.66890000 | -0.57150000 |
| C           | -6.33840000 | -0.92200000 | 0.18710000  |
| C           | -5.97770000 | 0.58270000  | 0.08860000  |
| C           | -1.29860000 | 2.50520000  | 0.01210000  |
| O           | 0.02560000  | 2.21440000  | -0.00720000 |
| C           | 0.44090000  | 0.86210000  | 0.24600000  |
| C           | -0.29630000 | -0.08780000 | -0.69430000 |
| O           | 1.85400000  | 0.78210000  | 0.00480000  |
| C           | 2.49290000  | -0.22160000 | 0.63870000  |
| C           | 3.94390000  | -0.24820000 | 0.31840000  |
| O           | 1.96230000  | -1.08520000 | 1.32460000  |
| C           | 4.57470000  | -1.50950000 | 0.30840000  |
| C           | 5.91880000  | -1.64390000 | -0.03370000 |
| C           | 6.65050000  | -0.50950000 | -0.34940000 |
| C           | 6.06250000  | 0.75090000  | -0.31430000 |
| C           | 4.70800000  | 0.90690000  | 0.03650000  |
| C           | 4.15380000  | 2.30520000  | 0.08300000  |
| O           | 7.96730000  | -0.58490000 | -0.69350000 |
| O           | 3.93030000  | -2.68010000 | 0.62470000  |
| O           | -1.70180000 | 3.65680000  | 0.10520000  |
| C           | -2.23460000 | -2.34790000 | -1.12660000 |
| C           | -6.37710000 | -1.36750000 | 1.66270000  |
| C           | -7.70280000 | -1.20130000 | -0.45140000 |
| H           | -3.96720000 | 2.58740000  | 0.35650000  |
| H           | -5.44620000 | -1.79710000 | -1.63350000 |
| H           | -4.99630000 | -2.64590000 | -0.12520000 |

|   |             |             |             |
|---|-------------|-------------|-------------|
| H | -6.41430000 | 1.05050000  | -0.80110000 |
| H | -6.28170000 | 1.14280000  | 0.97870000  |
| H | 0.22870000  | 0.65260000  | 1.30370000  |
| H | 0.02700000  | -1.11520000 | -0.50090000 |
| H | -0.05550000 | 0.14160000  | -1.73970000 |
| H | 6.36980000  | -2.63090000 | -0.04310000 |
| H | 6.67400000  | 1.61850000  | -0.55640000 |
| H | 4.95760000  | 3.04840000  | 0.13350000  |
| H | 3.56450000  | 2.51280000  | -0.81520000 |
| H | 3.54120000  | 2.45300000  | 0.97810000  |
| H | 8.24250000  | -1.51690000 | -0.67390000 |
| H | 3.07350000  | -2.46440000 | 1.05290000  |
| H | -3.05620000 | -2.94520000 | -1.53340000 |
| H | -1.48710000 | -2.27330000 | -1.92310000 |
| H | -1.80580000 | -2.88570000 | -0.27540000 |
| H | -7.15000000 | -0.82280000 | 2.21650000  |
| H | -6.60150000 | -2.43710000 | 1.74360000  |
| H | -5.42090000 | -1.19060000 | 2.16720000  |
| H | -7.94600000 | -2.26870000 | -0.40930000 |
| H | -8.49850000 | -0.65230000 | 0.06420000  |
| H | -7.71910000 | -0.89840000 | -1.50430000 |

| <b>4b-1</b> |             |             |             |
|-------------|-------------|-------------|-------------|
| Atom        | X           | Y           | Z           |
| C           | -3.13960000 | 0.29070000  | 0.78330000  |
| C           | -3.38290000 | 0.19980000  | -0.59210000 |
| C           | -2.72720000 | -0.73030000 | -1.37720000 |
| C           | -1.77940000 | -1.56080000 | -0.77020000 |
| C           | -1.51280000 | -1.46690000 | 0.61670000  |
| C           | -2.23230000 | -0.55570000 | 1.42270000  |
| C           | -4.01120000 | 1.35480000  | 1.39270000  |
| C           | -4.47510000 | 2.16880000  | 0.15420000  |
| C           | -4.43540000 | 1.17130000  | -1.03220000 |
| C           | -1.08010000 | -2.56920000 | -1.61410000 |
| O           | -0.00480000 | -3.18890000 | -1.06940000 |
| C           | 0.60480000  | -2.63690000 | 0.10950000  |
| C           | -0.45880000 | -2.38760000 | 1.18040000  |
| O           | 1.32410000  | -1.43930000 | -0.22650000 |
| C           | 2.26880000  | -1.06030000 | 0.65770000  |
| C           | 3.00100000  | 0.14980000  | 0.20430000  |
| O           | 2.57480000  | -1.66060000 | 1.67920000  |
| C           | 4.36190000  | 0.24580000  | 0.56010000  |
| C           | 5.14570000  | 1.31760000  | 0.13760000  |

|   |             |             |             |
|---|-------------|-------------|-------------|
| C | 4.56490000  | 2.31680000  | -0.62820000 |
| C | 3.21530000  | 2.26590000  | -0.96240000 |
| C | 2.40640000  | 1.19470000  | -0.53890000 |
| C | 0.94810000  | 1.23010000  | -0.90570000 |
| O | 5.28680000  | 3.38560000  | -1.06910000 |
| O | 5.00980000  | -0.68610000 | 1.33280000  |
| O | -1.47970000 | -2.84380000 | -2.73800000 |
| C | -1.99980000 | -0.45440000 | 2.90370000  |
| C | -3.51230000 | 3.34550000  | -0.10360000 |
| C | -5.88960000 | 2.72010000  | 0.35980000  |
| H | -2.94170000 | -0.81050000 | -2.43970000 |
| H | -4.85390000 | 0.87560000  | 1.90380000  |
| H | -3.45990000 | 1.97780000  | 2.10420000  |
| H | -5.38600000 | 0.63930000  | -1.15150000 |
| H | -4.17090000 | 1.65810000  | -1.97630000 |
| H | 1.31070000  | -3.39870000 | 0.46170000  |
| H | 0.00540000  | -1.94770000 | 2.06720000  |
| H | -0.94490000 | -3.32860000 | 1.46260000  |
| H | 6.19330000  | 1.35400000  | 0.41840000  |
| H | 2.79370000  | 3.07720000  | -1.55340000 |
| H | 0.64190000  | 2.23300000  | -1.22400000 |
| H | 0.74310000  | 0.54320000  | -1.73210000 |
| H | 0.32720000  | 0.97890000  | -0.04080000 |
| H | 6.20860000  | 3.28050000  | -0.77890000 |
| H | 4.34390000  | -1.27960000 | 1.74230000  |
| H | -2.83090000 | 0.04100000  | 3.41480000  |
| H | -1.91450000 | -1.44930000 | 3.35260000  |
| H | -1.08490000 | 0.11280000  | 3.10110000  |
| H | -3.50890000 | 4.04170000  | 0.74270000  |
| H | -2.48230000 | 3.00430000  | -0.25590000 |
| H | -3.81060000 | 3.90770000  | -0.99560000 |
| H | -6.23020000 | 3.26970000  | -0.52470000 |
| H | -6.60780000 | 1.91400000  | 0.54660000  |
| H | -5.92560000 | 3.40190000  | 1.21660000  |

| <b>4b-2</b> |             |             |             |
|-------------|-------------|-------------|-------------|
| Atom        | X           | Y           | Z           |
| C           | -3.06990000 | 0.47760000  | 0.71830000  |
| C           | -3.29420000 | 0.36860000  | -0.65920000 |
| C           | -2.63010000 | -0.57250000 | -1.42450000 |
| C           | -1.71200000 | -1.41610000 | -0.79110000 |
| C           | -1.45770000 | -1.30050000 | 0.59600000  |
| C           | -2.15750000 | -0.35020000 | 1.37610000  |

|   |             |             |             |
|---|-------------|-------------|-------------|
| C | -3.89810000 | 1.59740000  | 1.28760000  |
| C | -4.94630000 | 1.85720000  | 0.17110000  |
| C | -4.27340000 | 1.39340000  | -1.14560000 |
| C | -1.02590000 | -2.45400000 | -1.60980000 |
| O | 0.02110000  | -3.09750000 | -1.03850000 |
| C | 0.63150000  | -2.54430000 | 0.13930000  |
| C | -0.43730000 | -2.24010000 | 1.19030000  |
| O | 1.39630000  | -1.37870000 | -0.20800000 |
| C | 2.34070000  | -1.01520000 | 0.68290000  |
| C | 3.12600000  | 0.15640000  | 0.21610000  |
| O | 2.60660000  | -1.60330000 | 1.72270000  |
| C | 4.47930000  | 0.21710000  | 0.60730000  |
| C | 5.31070000  | 1.24960000  | 0.17770000  |
| C | 4.78600000  | 2.24510000  | -0.63200000 |
| C | 3.44530000  | 2.22930000  | -1.00340000 |
| C | 2.58870000  | 1.19830000  | -0.57350000 |
| C | 1.14360000  | 1.27170000  | -0.98480000 |
| O | 5.55590000  | 3.27610000  | -1.08180000 |
| O | 5.07440000  | -0.71320000 | 1.42310000  |
| O | -1.41330000 | -2.73180000 | -2.73720000 |
| C | -1.89700000 | -0.20400000 | 2.84900000  |
| C | -5.31680000 | 3.34230000  | 0.10360000  |
| C | -6.22380000 | 1.03540000  | 0.43590000  |
| H | -2.81960000 | -0.65410000 | -2.49170000 |
| H | -4.37980000 | 1.31800000  | 2.22950000  |
| H | -3.25310000 | 2.46800000  | 1.45230000  |
| H | -4.99180000 | 0.96610000  | -1.85250000 |
| H | -3.72510000 | 2.20720000  | -1.63350000 |
| H | 1.30630000  | -3.32260000 | 0.51540000  |
| H | 0.02880000  | -1.80010000 | 2.07560000  |
| H | -0.95560000 | -3.16050000 | 1.48360000  |
| H | 6.35090000  | 1.25910000  | 0.48700000  |
| H | 3.06840000  | 3.03650000  | -1.62920000 |
| H | 0.88210000  | 2.27400000  | -1.34230000 |
| H | 0.93890000  | 0.56700000  | -1.79620000 |
| H | 0.48920000  | 1.06870000  | -0.13200000 |
| H | 6.46510000  | 3.14880000  | -0.76230000 |
| H | 4.37850000  | -1.27580000 | 1.82630000  |
| H | -2.63500000 | 0.43300000  | 3.34360000  |
| H | -1.94290000 | -1.17950000 | 3.34430000  |
| H | -0.91010000 | 0.24100000  | 3.01140000  |
| H | -5.76660000 | 3.67890000  | 1.04420000  |
| H | -4.43460000 | 3.96450000  | -0.08390000 |
| H | -6.03460000 | 3.53280000  | -0.70190000 |



|   |             |             |             |
|---|-------------|-------------|-------------|
| H | -6.95880000 | 1.18480000  | -0.36300000 |
| H | -6.01250000 | -0.03790000 | 0.49570000  |
| H | -6.69360000 | 1.33390000  | 1.37990000  |

| <b>4b-3</b> |             |             |             |
|-------------|-------------|-------------|-------------|
| Atom        | X           | Y           | Z           |
| C           | -3.05130000 | 0.50660000  | 0.71040000  |
| C           | -3.31680000 | 0.21040000  | -0.63120000 |
| C           | -2.70500000 | -0.85500000 | -1.26580000 |
| C           | -1.78170000 | -1.61810000 | -0.54300000 |
| C           | -1.49340000 | -1.31880000 | 0.81000000  |
| C           | -2.16570000 | -0.26280000 | 1.46710000  |
| C           | -3.87720000 | 1.68350000  | 1.15330000  |
| C           | -4.33670000 | 2.30780000  | -0.19240000 |
| C           | -4.34190000 | 1.13770000  | -1.20970000 |
| C           | -1.14260000 | -2.78050000 | -1.22140000 |
| O           | -0.11330000 | -3.38170000 | -0.57590000 |
| C           | 0.54650000  | -2.68300000 | 0.49190000  |
| C           | -0.47990000 | -2.18880000 | 1.51150000  |
| O           | 1.33050000  | -1.60690000 | -0.04490000 |
| C           | 2.33730000  | -1.16860000 | 0.73580000  |
| C           | 3.03900000  | -0.00300000 | 0.13540000  |
| O           | 2.60880000  | -1.58900000 | 1.85270000  |
| C           | 3.61510000  | 0.92570000  | 1.02750000  |
| C           | 4.24600000  | 2.07910000  | 0.56530000  |
| C           | 4.32230000  | 2.30450000  | -0.80030000 |
| C           | 3.79070000  | 1.39040000  | -1.70420000 |
| C           | 3.15670000  | 0.21560000  | -1.25650000 |
| C           | 2.63410000  | -0.73530000 | -2.29940000 |
| O           | 4.92550000  | 3.41760000  | -1.30530000 |
| O           | 3.59920000  | 0.77530000  | 2.39250000  |
| O           | -1.55210000 | -3.19380000 | -2.29840000 |
| C           | -1.90860000 | 0.06060000  | 2.91190000  |
| C           | -3.34650000 | 3.40180000  | -0.64010000 |
| C           | -5.73250000 | 2.92550000  | -0.06080000 |
| H           | -2.93770000 | -1.09200000 | -2.30070000 |
| H           | -4.72590000 | 1.32060000  | 1.74420000  |
| H           | -3.29370000 | 2.39130000  | 1.75060000  |
| H           | -5.31050000 | 0.62600000  | -1.23960000 |
| H           | -4.07240000 | 1.46310000  | -2.21960000 |
| H           | 1.20940000  | -3.41880000 | 0.96300000  |
| H           | 0.02660000  | -1.63000000 | 2.30330000  |
| H           | -1.01200000 | -3.03690000 | 1.95770000  |

|   |             |             |             |
|---|-------------|-------------|-------------|
| H | 4.66840000  | 2.77770000  | 1.28020000  |
| H | 3.88080000  | 1.59810000  | -2.76910000 |
| H | 3.07840000  | -0.53150000 | -3.28020000 |
| H | 2.89610000  | -1.76890000 | -2.05190000 |
| H | 1.54900000  | -0.63460000 | -2.39930000 |
| H | 5.24950000  | 3.95960000  | -0.56640000 |
| H | 3.32150000  | -0.14170000 | 2.60720000  |
| H | -2.70910000 | 0.66890000  | 3.34370000  |
| H | -1.86180000 | -0.85380000 | 3.51230000  |
| H | -0.96650000 | 0.60860000  | 3.01110000  |
| H | -3.31180000 | 4.22060000  | 0.08740000  |
| H | -2.32870000 | 3.01100000  | -0.74780000 |
| H | -3.64250000 | 3.82700000  | -1.60570000 |
| H | -6.07090000 | 3.34090000  | -1.01650000 |
| H | -6.46970000 | 2.17970000  | 0.25660000  |
| H | -5.73730000 | 3.73300000  | 0.67970000  |

| <b>4b-4</b> |             |             |             |
|-------------|-------------|-------------|-------------|
| Atom        | X           | Y           | Z           |
| C           | 2.96510000  | -0.68720000 | 0.58350000  |
| C           | 3.21010000  | -0.31370000 | -0.74330000 |
| C           | 2.59320000  | 0.78850000  | -1.30640000 |
| C           | 1.70350000  | 1.52700000  | -0.51960000 |
| C           | 1.42900000  | 1.14710000  | 0.81560000  |
| C           | 2.07900000  | 0.02950000  | 1.39060000  |
| C           | 3.73960000  | -1.93280000 | 0.91890000  |
| C           | 4.78970000  | -2.00760000 | -0.22330000 |
| C           | 4.15180000  | -1.26110000 | -1.42220000 |
| C           | 1.07610000  | 2.74040000  | -1.11470000 |
| O           | 0.07150000  | 3.32190000  | -0.41470000 |
| C           | -0.58400000 | 2.57400000  | 0.62180000  |
| C           | 0.44930000  | 1.99560000  | 1.58860000  |
| O           | -1.40340000 | 1.55070000  | 0.03680000  |
| C           | -2.40510000 | 1.08850000  | 0.81020000  |
| C           | -3.14780000 | -0.02000000 | 0.15360000  |
| O           | -2.64360000 | 1.44400000  | 1.95680000  |
| C           | -3.72620000 | -0.99070000 | 0.99800000  |
| C           | -4.39490000 | -2.09730000 | 0.47810000  |
| C           | -4.50700000 | -2.23240000 | -0.89690000 |
| C           | -3.97360000 | -1.27430000 | -1.75290000 |
| C           | -3.30170000 | -0.14540000 | -1.24620000 |
| C           | -2.77960000 | 0.85880000  | -2.23810000 |
| O           | -5.14800000 | -3.29660000 | -1.45750000 |

|   |             |             |             |
|---|-------------|-------------|-------------|
| O | -3.67630000 | -0.92870000 | 2.36900000  |
| O | 1.47430000  | 3.20940000  | -2.17300000 |
| C | 1.79470000  | -0.39830000 | 2.80310000  |
| C | 5.10010000  | -3.46340000 | -0.58640000 |
| C | 6.09640000  | -1.31040000 | 0.20570000  |
| H | 2.79810000  | 1.07320000  | -2.33520000 |
| H | 4.22100000  | -1.86880000 | 1.89950000  |
| H | 3.05750000  | -2.79050000 | 0.90300000  |
| H | 4.89540000  | -0.73200000 | -2.02670000 |
| H | 3.57630000  | -1.93660000 | -2.06530000 |
| H | -1.22020000 | 3.29430000  | 1.15000000  |
| H | -0.05520000 | 1.40470000  | 2.35760000  |
| H | 1.01060000  | 2.80310000  | 2.07300000  |
| H | -4.81810000 | -2.83080000 | 1.15680000  |
| H | -4.09250000 | -1.41070000 | -2.82650000 |
| H | -3.25100000 | 0.72950000  | -3.21890000 |
| H | -3.01030000 | 1.88000000  | -1.91820000 |
| H | -1.69980000 | 0.73980000  | -2.37040000 |
| H | -5.46890000 | -3.87750000 | -0.74730000 |
| H | -3.37370000 | -0.03330000 | 2.63500000  |
| H | 2.49480000  | -1.15830000 | 3.15960000  |
| H | 1.88210000  | 0.45360000  | 3.48550000  |
| H | 0.78550000  | -0.81720000 | 2.87080000  |
| H | 5.52460000  | -4.00040000 | 0.26910000  |
| H | 4.19560000  | -3.99750000 | -0.89800000 |
| H | 5.81910000  | -3.51860000 | -1.41120000 |
| H | 6.83420000  | -1.32760000 | -0.60450000 |
| H | 5.92830000  | -0.26290000 | 0.47900000  |
| H | 6.54230000  | -1.81180000 | 1.07210000  |

| <b>4b-5</b> |             |             |             |
|-------------|-------------|-------------|-------------|
| Atom        | X           | Y           | Z           |
| C           | -3.14300000 | 0.28430000  | 0.78180000  |
| C           | -3.38170000 | 0.20200000  | -0.59480000 |
| C           | -2.72090000 | -0.72100000 | -1.38410000 |
| C           | -1.77320000 | -1.55360000 | -0.77970000 |
| C           | -1.51150000 | -1.46850000 | 0.60860000  |
| C           | -2.23550000 | -0.56420000 | 1.41830000  |
| C           | -4.02040000 | 1.34080000  | 1.39610000  |
| C           | -4.48390000 | 2.16140000  | 0.16180000  |
| C           | -4.43680000 | 1.17240000  | -1.03130000 |
| C           | -1.06870000 | -2.55450000 | -1.62840000 |
| O           | 0.00200000  | -3.18070000 | -1.08220000 |

|   |             |             |             |
|---|-------------|-------------|-------------|
| C | 0.60840000  | -2.63530000 | 0.10160000  |
| C | -0.45890000 | -2.39210000 | 1.17030000  |
| O | 1.32890000  | -1.43630000 | -0.22770000 |
| C | 2.26430000  | -1.05510000 | 0.66560000  |
| C | 3.00220000  | 0.15210000  | 0.21280000  |
| O | 2.55650000  | -1.65110000 | 1.69340000  |
| C | 4.35960000  | 0.24610000  | 0.57820000  |
| C | 5.14430000  | 1.31430000  | 0.15240000  |
| C | 4.57490000  | 2.31030000  | -0.62570000 |
| C | 3.22680000  | 2.26330000  | -0.97090000 |
| C | 2.41470000  | 1.19490000  | -0.54180000 |
| C | 0.95700000  | 1.22780000  | -0.91440000 |
| O | 5.37480000  | 3.33800000  | -1.02850000 |
| O | 4.99880000  | -0.68330000 | 1.36000000  |
| O | -1.46000000 | -2.81630000 | -2.75830000 |
| C | -2.00840000 | -0.47320000 | 2.90090000  |
| C | -3.52510000 | 3.34380000  | -0.08500000 |
| C | -5.90120000 | 2.70570000  | 0.36700000  |
| H | -2.93250000 | -0.79520000 | -2.44770000 |
| H | -4.86280000 | 0.85480000  | 1.90140000  |
| H | -3.47350000 | 1.96100000  | 2.11340000  |
| H | -5.38490000 | 0.63750000  | -1.15720000 |
| H | -4.17140000 | 1.66670000  | -1.97130000 |
| H | 1.31410000  | -3.39830000 | 0.45170000  |
| H | 0.00150000  | -1.95750000 | 2.06160000  |
| H | -0.94560000 | -3.33500000 | 1.44520000  |
| H | 6.19330000  | 1.36790000  | 0.42910000  |
| H | 2.79310000  | 3.06140000  | -1.56890000 |
| H | 0.65080000  | 2.23010000  | -1.23460000 |
| H | 0.75630000  | 0.54000000  | -1.74100000 |
| H | 0.33280000  | 0.97720000  | -0.05160000 |
| H | 4.85880000  | 3.94450000  | -1.58420000 |
| H | 4.32980000  | -1.26970000 | 1.77310000  |
| H | -2.84120000 | 0.01890000  | 3.41250000  |
| H | -1.92520000 | -1.47140000 | 3.34310000  |
| H | -1.09410000 | 0.09230000  | 3.10570000  |
| H | -3.52690000 | 4.03410000  | 0.76610000  |
| H | -2.49330000 | 3.00780000  | -0.23670000 |
| H | -3.82310000 | 3.91100000  | -0.97400000 |
| H | -6.24140000 | 3.26010000  | -0.51470000 |
| H | -6.61670000 | 1.89550000  | 0.54610000  |
| H | -5.94240000 | 3.38140000  | 1.22830000  |

| <b>4b-6</b> |             |             |             |
|-------------|-------------|-------------|-------------|
| Atom        | X           | Y           | Z           |
| C           | -3.04890000 | 0.49730000  | 0.70160000  |
| C           | -3.30850000 | 0.19870000  | -0.64060000 |
| C           | -2.69030000 | -0.86480000 | -1.27190000 |
| C           | -1.76670000 | -1.62390000 | -0.54510000 |
| C           | -1.48510000 | -1.32270000 | 0.80890000  |
| C           | -2.16340000 | -0.26830000 | 1.46230000  |
| C           | -3.88030000 | 1.67170000  | 1.14060000  |
| C           | -4.33770000 | 2.29280000  | -0.20730000 |
| C           | -4.33520000 | 1.12160000  | -1.22330000 |
| C           | -1.11920000 | -2.78320000 | -1.22110000 |
| O           | -0.09430000 | -3.38410000 | -0.56820000 |
| C           | 0.55950000  | -2.68270000 | 0.50160000  |
| C           | -0.47220000 | -2.18900000 | 1.51590000  |
| O           | 1.34320000  | -1.60600000 | -0.03450000 |
| C           | 2.34430000  | -1.16270000 | 0.75120000  |
| C           | 3.03790000  | 0.00600000  | 0.14930000  |
| O           | 2.61300000  | -1.57950000 | 1.86970000  |
| C           | 3.56800000  | 0.96180000  | 1.03880000  |
| C           | 4.18150000  | 2.11890000  | 0.56660000  |
| C           | 4.28940000  | 2.32340000  | -0.80010000 |
| C           | 3.80500000  | 1.38090000  | -1.70320000 |
| C           | 3.18790000  | 0.20000000  | -1.24440000 |
| C           | 2.71350000  | -0.78850000 | -2.27630000 |
| O           | 4.89210000  | 3.46950000  | -1.22600000 |
| O           | 3.51840000  | 0.83330000  | 2.40450000  |
| O           | -1.51710000 | -3.19340000 | -2.30360000 |
| C           | -1.91220000 | 0.05800000  | 2.90760000  |
| C           | -3.35010000 | 3.38990000  | -0.65290000 |
| C           | -5.73630000 | 2.90550000  | -0.08100000 |
| H           | -2.91840000 | -1.10370000 | -2.30740000 |
| H           | -4.72970000 | 1.30640000  | 1.72910000  |
| H           | -3.30130000 | 2.38220000  | 1.73890000  |
| H           | -5.30180000 | 0.60620000  | -1.25580000 |
| H           | -4.06380000 | 1.44680000  | -2.23270000 |
| H           | 1.22210000  | -3.41630000 | 0.97640000  |
| H           | 0.02980000  | -1.62750000 | 2.30880000  |
| H           | -1.00400000 | -3.03760000 | 1.96160000  |
| H           | 4.57460000  | 2.85390000  | 1.26290000  |
| H           | 3.90860000  | 1.55190000  | -2.77220000 |
| H           | 3.18930000  | -0.60710000 | -3.24660000 |
| H           | 2.97970000  | -1.81090000 | -1.98990000 |
| H           | 1.63120000  | -0.70560000 | -2.41550000 |

|   |             |             |             |
|---|-------------|-------------|-------------|
| H | 4.89820000  | 3.48410000  | -2.19700000 |
| H | 3.27380000  | -0.09000000 | 2.62870000  |
| H | -2.71590000 | 0.66460000  | 3.33580000  |
| H | -1.86500000 | -0.85540000 | 3.50950000  |
| H | -0.97200000 | 0.60880000  | 3.00920000  |
| H | -3.32090000 | 4.20970000  | 0.07370000  |
| H | -2.33050000 | 3.00290000  | -0.75690000 |
| H | -3.64450000 | 3.81300000  | -1.62000000 |
| H | -6.07300000 | 3.31850000  | -1.03830000 |
| H | -6.47170000 | 2.15720000  | 0.23480000  |
| H | -5.74650000 | 3.71380000  | 0.65860000  |

| <b>4b-7</b> |             |             |             |
|-------------|-------------|-------------|-------------|
| Atom        | X           | Y           | Z           |
| C           | -3.07330000 | 0.47230000  | 0.71940000  |
| C           | -3.29330000 | 0.37390000  | -0.65960000 |
| C           | -2.62450000 | -0.55950000 | -1.43030000 |
| C           | -1.70670000 | -1.40650000 | -0.80100000 |
| C           | -1.45720000 | -1.30170000 | 0.58770000  |
| C           | -2.16100000 | -0.35870000 | 1.37320000  |
| C           | -3.90710000 | 1.58440000  | 1.29560000  |
| C           | -4.95300000 | 1.84980000  | 0.17820000  |
| C           | -4.27470000 | 1.39920000  | -1.14020000 |
| C           | -1.01590000 | -2.43630000 | -1.62620000 |
| O           | 0.02590000  | -3.08760000 | -1.05440000 |
| C           | 0.63360000  | -2.54280000 | 0.12880000  |
| C           | -0.43860000 | -2.24570000 | 1.17840000  |
| O           | 1.39990000  | -1.37570000 | -0.21050000 |
| C           | 2.33540000  | -1.01110000 | 0.68960000  |
| C           | 3.12690000  | 0.15750000  | 0.22480000  |
| O           | 2.58750000  | -1.59570000 | 1.73450000  |
| C           | 4.47650000  | 0.21550000  | 0.62530000  |
| C           | 5.30930000  | 1.24430000  | 0.19350000  |
| C           | 4.79670000  | 2.23690000  | -0.62700000 |
| C           | 3.45780000  | 2.22580000  | -1.00930000 |
| C           | 2.59740000  | 1.19790000  | -0.57480000 |
| C           | 1.15310000  | 1.27000000  | -0.99160000 |
| O           | 5.64250000  | 3.22510000  | -1.03430000 |
| O           | 5.06230000  | -0.71310000 | 1.44890000  |
| O           | -1.39490000 | -2.69970000 | -2.75990000 |
| C           | -1.90590000 | -0.22480000 | 2.84830000  |
| C           | -5.32830000 | 3.33420000  | 0.12190000  |
| C           | -6.22840000 | 1.02150000  | 0.43260000  |

|   |             |             |             |
|---|-------------|-------------|-------------|
| H | -2.81130000 | -0.63350000 | -2.49860000 |
| H | -4.39060000 | 1.29530000  | 2.23370000  |
| H | -3.26560000 | 2.45580000  | 1.46960000  |
| H | -4.98960000 | 0.97520000  | -1.85260000 |
| H | -3.72790000 | 2.21890000  | -1.62000000 |
| H | 1.30780000  | -3.32330000 | 0.50160000  |
| H | 0.02390000  | -1.81230000 | 2.06880000  |
| H | -0.95800000 | -3.16810000 | 1.46320000  |
| H | 6.35150000  | 1.26980000  | 0.49830000  |
| H | 3.06900000  | 3.02090000  | -1.64110000 |
| H | 0.89220000  | 2.27210000  | -1.35000000 |
| H | 0.95210000  | 0.56510000  | -1.80370000 |
| H | 0.49540000  | 1.06720000  | -0.14120000 |
| H | 5.16350000  | 3.83320000  | -1.62070000 |
| H | 4.36320000  | -1.26850000 | 1.85490000  |
| H | -2.64360000 | 0.41070000  | 3.34500000  |
| H | -1.95660000 | -1.20410000 | 3.33560000  |
| H | -0.91830000 | 0.21610000  | 3.01810000  |
| H | -5.78200000 | 3.66150000  | 1.06400000  |
| H | -4.44770000 | 3.96090000  | -0.05790000 |
| H | -6.04450000 | 3.52890000  | -0.68410000 |
| H | -6.96170000 | 1.17500000  | -0.36720000 |
| H | -6.01360000 | -0.05150000 | 0.48410000  |
| H | -6.70190000 | 1.31060000  | 1.37760000  |

| <b>4b-8</b> |             |             |             |
|-------------|-------------|-------------|-------------|
| Atom        | X           | Y           | Z           |
| C           | 2.96230000  | -0.67990000 | 0.57580000  |
| C           | 3.20190000  | -0.30410000 | -0.75130000 |
| C           | 2.57950000  | 0.79670000  | -1.31120000 |
| C           | 1.69000000  | 1.53160000  | -0.52060000 |
| C           | 1.42180000  | 1.14970000  | 0.81520000  |
| C           | 2.07670000  | 0.03320000  | 1.38660000  |
| C           | 3.74150000  | -1.92360000 | 0.90750000  |
| C           | 4.78840000  | -1.99370000 | -0.23800000 |
| C           | 4.14470000  | -1.24780000 | -1.43410000 |
| C           | 1.05530000  | 2.74240000  | -1.11330000 |
| O           | 0.05560000  | 3.32390000  | -0.40620000 |
| C           | -0.59470000 | 2.57350000  | 0.63200000  |
| C           | 0.44330000  | 1.99490000  | 1.59350000  |
| O           | -1.41460000 | 1.55030000  | 0.04750000  |
| C           | -2.41090000 | 1.08320000  | 0.82550000  |
| C           | -3.14640000 | -0.02770000 | 0.16690000  |

|   |             |             |             |
|---|-------------|-------------|-------------|
| O | -2.64640000 | 1.43490000  | 1.97340000  |
| C | -3.67990000 | -1.02640000 | 1.00570000  |
| C | -4.33230000 | -2.13580000 | 0.47510000  |
| C | -4.47610000 | -2.24880000 | -0.89890000 |
| C | -3.98890000 | -1.26120000 | -1.75110000 |
| C | -3.33250000 | -0.12730000 | -1.23230000 |
| C | -2.85700000 | 0.91480000  | -2.20940000 |
| O | -5.11650000 | -3.35050000 | -1.38290000 |
| O | -3.59640000 | -0.98750000 | 2.37530000  |
| O | 1.44220000  | 3.20870000  | -2.17700000 |
| C | 1.79770000  | -0.39770000 | 2.79930000  |
| C | 5.10230000  | -3.44810000 | -0.60380000 |
| C | 6.09420000  | -1.29300000 | 0.18800000  |
| H | 2.78030000  | 1.08310000  | -2.34020000 |
| H | 4.22560000  | -1.85930000 | 1.88660000  |
| H | 3.06200000  | -2.78330000 | 0.89250000  |
| H | 4.88480000  | -0.71550000 | -2.04010000 |
| H | 3.56940000  | -1.92420000 | -2.07630000 |
| H | -1.23010000 | 3.29180000  | 1.16380000  |
| H | -0.05730000 | 1.40170000  | 2.36330000  |
| H | 1.00490000  | 2.80250000  | 2.07740000  |
| H | -4.72780000 | -2.90510000 | 1.13200000  |
| H | -4.12090000 | -1.36020000 | -2.82600000 |
| H | -3.35940000 | 0.80850000  | -3.17750000 |
| H | -3.09050000 | 1.92240000  | -1.85100000 |
| H | -1.78070000 | 0.81550000  | -2.38020000 |
| H | -5.14550000 | -3.30170000 | -2.35250000 |
| H | -3.32610000 | -0.08600000 | 2.65220000  |
| H | 2.50020000  | -1.15720000 | 3.15220000  |
| H | 1.88590000  | 0.45310000  | 3.48300000  |
| H | 0.78950000  | -0.81850000 | 2.86960000  |
| H | 5.53090000  | -3.98490000 | 0.24970000  |
| H | 4.19850000  | -3.98460000 | -0.91340000 |
| H | 5.81900000  | -3.50010000 | -1.43080000 |
| H | 6.82960000  | -1.30690000 | -0.62440000 |
| H | 5.92370000  | -0.24640000 | 0.46310000  |
| H | 6.54430000  | -1.79400000 | 1.05250000  |

| <b>4b-9</b> |            |             |             |
|-------------|------------|-------------|-------------|
| Atom        | X          | Y           | Z           |
| C           | 4.04090000 | -0.72790000 | -0.44290000 |
| C           | 4.48730000 | 0.54250000  | -0.06190000 |
| C           | 3.60640000 | 1.59790000  | 0.08770000  |



|   |             |             |             |
|---|-------------|-------------|-------------|
| C | 2.24340000  | 1.36040000  | -0.11980000 |
| C | 1.77810000  | 0.07600000  | -0.48970000 |
| C | 2.69160000  | -0.98280000 | -0.69530000 |
| C | 5.20760000  | -1.66890000 | -0.57150000 |
| C | 6.33840000  | -0.92200000 | 0.18710000  |
| C | 5.97770000  | 0.58270000  | 0.08860000  |
| C | 1.29860000  | 2.50520000  | 0.01210000  |
| O | -0.02560000 | 2.21440000  | -0.00720000 |
| C | -0.44090000 | 0.86210000  | 0.24600000  |
| C | 0.29630000  | -0.08780000 | -0.69430000 |
| O | -1.85400000 | 0.78210000  | 0.00480000  |
| C | -2.49290000 | -0.22160000 | 0.63870000  |
| C | -3.94390000 | -0.24820000 | 0.31840000  |
| O | -1.96230000 | -1.08520000 | 1.32460000  |
| C | -4.57470000 | -1.50950000 | 0.30840000  |
| C | -5.91880000 | -1.64390000 | -0.03370000 |
| C | -6.65050000 | -0.50950000 | -0.34940000 |
| C | -6.06250000 | 0.75090000  | -0.31430000 |
| C | -4.70800000 | 0.90690000  | 0.03650000  |
| C | -4.15380000 | 2.30520000  | 0.08300000  |
| O | -7.96730000 | -0.58490000 | -0.69350000 |
| O | -3.93030000 | -2.68010000 | 0.62470000  |
| O | 1.70180000  | 3.65680000  | 0.10520000  |
| C | 2.23460000  | -2.34790000 | -1.12660000 |
| C | 7.70280000  | -1.20130000 | -0.45140000 |
| C | 6.37710000  | -1.36750000 | 1.66270000  |
| H | 3.96720000  | 2.58740000  | 0.35650000  |
| H | 4.99630000  | -2.64590000 | -0.12520000 |
| H | 5.44620000  | -1.79710000 | -1.63350000 |
| H | 6.28170000  | 1.14280000  | 0.97870000  |
| H | 6.41430000  | 1.05050000  | -0.80110000 |
| H | -0.22870000 | 0.65260000  | 1.30370000  |
| H | 0.05550000  | 0.14160000  | -1.73970000 |
| H | -0.02700000 | -1.11520000 | -0.50090000 |
| H | -6.36980000 | -2.63090000 | -0.04310000 |
| H | -6.67400000 | 1.61850000  | -0.55640000 |
| H | -4.95760000 | 3.04840000  | 0.13350000  |
| H | -3.54120000 | 2.45300000  | 0.97810000  |
| H | -3.56450000 | 2.51280000  | -0.81520000 |
| H | -8.24250000 | -1.51690000 | -0.67390000 |
| H | -3.07350000 | -2.46440000 | 1.05290000  |
| H | 3.05620000  | -2.94520000 | -1.53340000 |
| H | 1.80580000  | -2.88570000 | -0.27540000 |
| H | 1.48710000  | -2.27330000 | -1.92310000 |

|   |           |            |            |
|---|-----------|------------|------------|
| H | 7.9460000 | -2.2687000 | -0.4093000 |
| H | 7.7191000 | -0.8984000 | -1.5043000 |
| H | 8.4985000 | -0.6523000 | 0.0642000  |
| H | 7.1500000 | -0.8228000 | 2.2165000  |
| H | 5.4209000 | -1.1906000 | 2.1672000  |
| H | 6.6015000 | -2.4371000 | 1.7436000  |
